# Supplementary material for: Modeling Insertional Mutagenesis Using Gene Length and Expression in Murine Embryonic Stem Cells
Source: PLoS One. 2007 Jul 18;2(7):e617. doi: 10.1371/journal.pone.0000617 (PMC1910612; doi:10.1371/journal.pone.0000617)
Supplement: Table S2 — Summarizes the dataset used for this analysis. Included are the length and expression values for genes included in the analysis, number of traps in each gene by gene-trap vector, and the derived trap score for each gene. Hotspots genes are tagged in the trap score column for each vector. Omniback gene-trap events, used here as a validation set, are listed in the final column. (1.60 MB XLS) [file pone.0000617.s002.xls]

## Sheet: Sheet1
Ensembl Gene ID	MGI_symbol	log2len	log2exp	SA Plasmid	SA Viral	Poly-A	SA Plasmid.Score	SA Viral.Score	Poly-A.Score	Omnibank Traps
ENSMUSG00000000001	Gnai3	5.28044	10.6107	3	0	0	188.424	186.498	21.4372	1
ENSMUSG00000000028	Cdc45l	4.97824	7.8217	0	0	0	58.8934	30.1412	15.3324	1
ENSMUSG00000000058	Cav2	2.94392	4.83935	0	0	0	4.23301	3.90549	8.75794	0
ENSMUSG00000000078	Klf6	2.72137	9.19607	1	0	1	22.0393	24.7428	12.9084	0
ENSMUSG00000000088	Cox5a	3.47845	12.6027	0	0	0	73.8406	161.549	18.3538	21
ENSMUSG00000000093	Tbx2	3.00953	2.38898	0	0	0	1.6565	2.49264	7.03275	0
ENSMUSG00000000094	Tbx4	4.70227	2.89799	0	0	0	7.42643	7.45658	9.18322	0
ENSMUSG00000000120	Ngfr	4.2381	7.41437	0	0	0	29.1729	16.2385	12.6384	1
ENSMUSG00000000126	Wnt9a	4.61164	5.69835	0	0	0	18.8478	9.60077	11.6101	0
ENSMUSG00000000131	Xpo6	6.62488	4.41897	6	0	0	30.3796	17.595	19.7315	13
ENSMUSG00000000142	Axin2	4.92685	7.40277	0	0	0	46.4748	21.7135	14.5709	0
ENSMUSG00000000149	Gna12	6.13916	7.56126	0	0	0	83.6635	35.6059	21.6364	7
ENSMUSG00000000163	Etnk2	4.04282	5.7999	0	0	0	12.6743	7.43879	10.5844	0
ENSMUSG00000000168	Dlat	4.65226	8.49346	1	0	0	66.5665	43.8573	15.0926	0
ENSMUSG00000000184	Ccnd2	4.44035	6.8336	0	0	0	25.7534	12.3847	12.4339	0
ENSMUSG00000000194	AI790205	6.00527	7.33195	2	0	1	71.2325	29.2455	20.1691	44
ENSMUSG00000000214	Th	2.84619	2.17873	0	0	0	1.34718	2.03846	6.85339	0
ENSMUSG00000000216	Scnn1g	4.89356	2.47886	0	0	0	6.80287	6.78088	9.24409	0
ENSMUSG00000000223	Drp2	5.60179	6.00303	0	0	0	34.7312	14.3553	15.5677	0
ENSMUSG00000000247	Lhx2	4.20328	2.17474	0	0	0	3.60487	4.34638	7.81036	0
ENSMUSG00000000253	Gmpr	5.28255	5.86937	0	0	0	29.0191	12.6776	13.9499	0
ENSMUSG00000000263	Glra1	5.91227	2.92891	0	0	0	13.2503	11.3986	13.0824	0
ENSMUSG00000000266	Mid2	6.68315	3.17823	0	0	0	19.349	14.8052	18.0682	0
ENSMUSG00000000276	Dgke	4.84383	2.49208	3	0	0	6.65268	6.68801	9.1446	2
ENSMUSG00000000278	Scpep1	4.97329	10.2066	1	1	2	146.627	138.673	19.0132	81
ENSMUSG00000000282	Mnt	3.88626	7.59899	1	0	0	24.1767	15.5625	12.1928	7
ENSMUSG00000000290	Itgb2	5.14196	2.74172	0	0	0	8.83631	8.32681	10.0962	0
ENSMUSG00000000295	Hddc2	3.88147	9.5874	0	0	0	56.1386	61.2687	14.5948	0
ENSMUSG00000000296	Tpd52l1	6.82708	8.12768	0	0	0	139.391	63.1355	30.1172	0
ENSMUSG00000000303	Cdh1	6.06348	12.2661	2	0	1	335.774	424.001	32.2394	32
ENSMUSG00000000305	Cdh4	8.82431	3.1769	0	0	0	36.5645	18.6089	52.4901	1
ENSMUSG00000000317	Bcl6b	2.33485	7.13584	0	0	0	7.03505	4.44006	10.668	0
ENSMUSG00000000320	Alox12	3.79566	8.02749	0	0	0	27.8055	20.5096	12.532	0
ENSMUSG00000000325	Arvcf	5.87819	5.90202	0	0	0	37.1968	15.2969	16.9297	30
ENSMUSG00000000326	Comt	4.24588	7.86317	0	0	0	36.6908	22.7058	13.1811	12
ENSMUSG00000000339	Rtcd1	4.2589	9.24635	0	0	0	67.5024	60.5996	14.9771	0
ENSMUSG00000000340	Dbt	5.21669	7.46875	0	0	0	55.7346	25.3265	15.829	3
ENSMUSG00000000346	Dazap2	2.35473	8.96411	0	0	0	16.687	16.7948	12.5921	0
ENSMUSG00000000355	Mcts1	3.68538	10.3404	0	0	0	59.508	81.1406	15.2618	11
ENSMUSG00000000359	Rem1	3.03281	2.97612	0	0	0	2.23801	3.21998	7.42614	0
ENSMUSG00000000374	Tmem1	4.59311	7.4129	0	0	0	37.9139	19.0699	13.5119	0
ENSMUSG00000000378	Ccm2	5.63775	7.55653	1	0	0	69.5952	30.9517	18.135	19
ENSMUSG00000000392	Fap	6.19142	2.69971	0	0	0	13.102	11.1941	14.1959	0
ENSMUSG00000000420	Galnt1	6.34643	8.78279	0	0	0	159.28	92.2683	26.1806	24
ENSMUSG00000000435	Myf5	1.69019	3.48242	0	0	0	1.44912	1.52335	7.79101	0
ENSMUSG00000000439	Mkrn2	4.06531	7.9096	0	0	0	32.5543	21.5377	12.8607	0
ENSMUSG00000000486	1-Sep	2.00144	6.18457	0	0	0	4.02276	2.29825	9.83994	12
ENSMUSG00000000489	Pdgfb	4.24298	5.956	0	0	0	15.6482	8.38459	11.0809	1
ENSMUSG00000000530	Acvrl1	3.87941	2.90542	0	0	0	4.00471	5.07496	7.95677	0
ENSMUSG00000000531	Grasp	3.09559	5.49439	0	0	0	5.67526	4.29285	9.36387	1
ENSMUSG00000000538	Tom1l2	6.97906	6.37061	3	0	0	64.0004	21.6175	27.4593	0
ENSMUSG00000000552	Zfp385	4.71138	8.39166	0	0	0	66.0999	41.7345	15.1491	8
ENSMUSG00000000560	Gabra2	7.07979	3.56724	0	0	0	25.9538	17.5632	22.2812	0
ENSMUSG00000000561	Wdr77	3.35938	8.78539	0	0	0	28.1514	28.0135	12.8495	4
ENSMUSG00000000563	Atp5f1	4.05041	11.3437	1	0	0	97.9585	148.33	17.5243	10
ENSMUSG00000000567	Sox9	2.46624	5.53793	0	0	0	4.0103	2.88488	9.22779	0
ENSMUSG00000000581	C1d	3.53094	10.3889	0	0	0	53.501	76.2008	15.0869	8
ENSMUSG00000000627	Sema4f	4.79795	2.33023	0	0	1	5.96302	6.09796	8.91417	0
ENSMUSG00000000628	Hk2	5.62682	10.7394	0	1	0	224.01	220.334	24.1219	3
ENSMUSG00000000631	Myo18a	6.4712	8.37639	1	0	0	139.304	71.0472	26.5235	13
ENSMUSG00000000693	Loxl3	4.197	5.15562	0	0	0	11.7155	7.79266	10.2259	0
ENSMUSG00000000708	Pcaf	6.67718	2.81611	2	0	0	16.3305	13.0206	17.44	61
ENSMUSG00000000711	Rab5b	4.20069	5.13061	0	0	0	11.6615	7.80752	10.2089	14
ENSMUSG00000000724	Cryba1	2.73704	2.28059	0	0	0	1.33351	1.99757	6.89435	15
ENSMUSG00000000751	Rpa1	5.58646	10.3213	2	0	0	200.114	180.779	22.923	20
ENSMUSG00000000753	Serpinf1	3.67197	3.19528	0	0	0	3.88191	5.01449	7.96834	0
ENSMUSG00000000759	Tubgcp3	5.8536	6.09606	1	0	0	39.4427	15.7263	17.0831	0
ENSMUSG00000000766	Oprm1	8.13405	2.34339	0	0	0	20.1941	12.8583	33.4723	0
ENSMUSG00000000776	Polr3d	2.21785	6.06515	0	0	0	4.23673	2.59934	9.69053	0
ENSMUSG00000000782	Tcf7	4.93433	8.38665	1	0	0	75.3919	45.4785	15.9614	1
ENSMUSG00000000787	Ddx3x	3.53319	12.955	0	0	0	79.3981	182.37	19.047	0
ENSMUSG00000000792	Slc5a5	3.30247	6.0069	0	0	0	7.7075	5.12463	9.94222	0
ENSMUSG00000000794	Kcnn3	7.19978	3.83348	0	0	0	29.8922	18.7194	24.1197	2
ENSMUSG00000000804	Usp32	6.90053	9.10914	1	0	0	217.335	127.347	33.9994	0
ENSMUSG00000000811	Txnrd3	4.9792	5.14214	0	0	0	19.8723	10.9338	12.0257	0
ENSMUSG00000000823	Gm632	3.37226	6.73902	0	0	0	10.7982	6.79068	10.6828	2
ENSMUSG00000000827	Tpd52l2	4.28991	9.57644	0	0	0	77.3229	74.5894	15.5153	4
ENSMUSG00000000838	Fmr1	5.30053	9.60105	0	0	0	144.7	113.979	19.6744	3
ENSMUSG00000000876	Pxmp4	4.05572	5.0188	0	0	0	10.0531	7.27853	9.87898	6
ENSMUSG00000000881	Dlgh3	5.66352	6.92028	0	0	0	51.5922	20.5033	17.2627	11
ENSMUSG00000000889	Dbh	4.14462	5.56895	0	0	0	12.7586	7.67027	10.5275	0
ENSMUSG00000000901	Mmp11	3.20883	5.7641	0	0	0	6.66197	4.68593	9.66206	2
ENSMUSG00000000915	Hip1r	4.8984	7.83151	0	0	0	56.6058	29.4432	15.043	0
ENSMUSG00000000916	Nsun5	2.76893	6.56736	0	0	0	6.82034	4.35259	10.1815	2
ENSMUSG00000000942	Hoxa4	0.0949116	3.30733	0	0	0	0.883445	0.429839	8.79376	0
ENSMUSG00000000948	Snrpn	4.46669	10.6639	0	0	0	118.356	138.304	17.6917	22
ENSMUSG00000000957	Mmp14	3.14714	7.27398	0	0	0	11.9088	8.164	11.038	0
ENSMUSG00000001016	Ilf2	3.60632	9.03659	2	0	0	37.2958	38.0017	13.4448	4
ENSMUSG00000001020	S100a4	1.18523	2.55959	0	0	0	0.803027	0.765153	7.39037	1
ENSMUSG00000001021	S100a3	3.97021	2.13075	0	0	0	2.92747	3.78875	7.50813	0
ENSMUSG00000001023	S100a5	0.975997	2.63936	0	0	0	0.787663	0.675637	7.56891	1
ENSMUSG00000001027	Scn4a	4.91107	6.35785	0	0	0	28.6709	12.3229	13.201	0
ENSMUSG00000001036	Epn2	5.96382	8.46603	1	0	0	121.721	67.2767	22.0236	18
ENSMUSG00000001039	Eppb9	2.96014	7.69676	0	0	0	13.0472	9.86026	11.3585	0
ENSMUSG00000001052	Sec24b	6.28031	7.99894	1	0	0	109.135	51.1937	23.7601	1
ENSMUSG00000001056	Nola2	1.97893	12.4602	0	0	0	31.1383	59.7234	17.4021	9
ENSMUSG00000001065	Zfp276	3.95364	6.38771	0	0	0	14.5746	8.06543	11.0231	1
ENSMUSG00000001089	Luzp1	6.31366	8.31024	2	1	0	128.086	65.3349	24.7607	24
ENSMUSG00000001098	Kctd10	4.08015	7.28083	1	0	0	24.1123	13.7088	12.1746	2
ENSMUSG00000001100	Poldip2	3.38585	8.14638	0	0	0	21.5684	17.8973	12.1515	13
ENSMUSG00000001119	Col6a1	4.10886	6.18499	0	0	0	15.2735	8.22859	11.0707	0
ENSMUSG00000001120	Pcbp3	5.28437	6.17144	1	0	0	32.2847	13.4164	14.3451	3
ENSMUSG00000001127	Araf	3.57797	7.65004	0	0	0	19.4725	13.691	11.8211	4
ENSMUSG00000001138	Cnnm3	3.98057	7.6726	0	0	0	27.0469	17.253	12.433	2
ENSMUSG00000001143	Lman2l	4.4629	7.00693	0	0	0	28.3752	13.7996	12.686	1
ENSMUSG00000001144	Ankrd39	3.17457	4.29104	0	0	0	4.12993	4.50152	8.4345	0
ENSMUSG00000001155	Ftcd	3.84529	2.16973	0	0	0	2.70336	3.61983	7.41031	0
ENSMUSG00000001156	Mxd1	4.24192	5.59606	0	0	0	13.8901	8.05338	10.7229	0
ENSMUSG00000001157	Gcl	5.3782	8.47717	0	0	0	97.6254	56.9938	18.1782	2
ENSMUSG00000001173	Ocrl	5.73912	5.69739	0	0	0	33.0401	14.3651	15.843	3
ENSMUSG00000001211	Agpat3	6.33546	4.5453	0	0	0	28.6839	16.5572	17.7459	4
ENSMUSG00000001225	Slc26a3	5.14637	2.95061	0	0	0	9.78083	9.03453	10.3018	0
ENSMUSG00000001227	Sema6b	3.14388	5.78427	0	0	0	6.42369	4.51748	9.64034	0
ENSMUSG00000001229	Dpp9	5.00697	7.56845	1	0	0	52.727	25.2195	15.0947	1
ENSMUSG00000001260	Gabrg1	6.51682	2.95966	0	0	0	16.5708	13.308	16.528	0
ENSMUSG00000001280	Sp1	4.70077	10.2316	3	4	0	125.487	125.848	17.8598	43
ENSMUSG00000001281	Itgb7	3.99458	5.13769	0	0	0	9.9212	7.0494	9.89765	9
ENSMUSG00000001285	Myg1	2.61659	8.32955	0	0	0	14.56	12.8136	11.9069	0
ENSMUSG00000001289	Pfdn5	2.41468	10.6944	0	0	0	28.8034	43.8509	14.7319	9
ENSMUSG00000001300	Efnb2	5.43763	7.55239	0	0	0	64.0918	28.9885	17.0178	1
ENSMUSG00000001313	Rnd2	1.81147	8.03931	0	0	0	8.7629	5.93546	11.719	4
ENSMUSG00000001323	Srr	4.26266	5.75672	0	0	0	14.8635	8.24333	10.9188	7
ENSMUSG00000001333	Sync	4.3884	3.59363	0	0	0	8.08121	7.96512	9.17625	2
ENSMUSG00000001334	Fndc5	2.9138	7.38064	0	0	0	10.839	7.6158	11.0158	1
ENSMUSG00000001349	Cnn1	3.36247	8.10127	0	0	0	20.758	17.061	12.079	2
ENSMUSG00000001379	Apbb3	3.0365	3.93775	0	0	0	3.3463	4.05209	8.10481	0
ENSMUSG00000001380	Hars	4.05233	9.21285	1	0	0	56.6649	53.6757	14.4473	2
ENSMUSG00000001383	Zmat2	2.52105	9.79698	0	0	0	24.1262	30.6569	13.5867	3
ENSMUSG00000001403	Ube2c	2.86711	11.6995	0	0	1	44.1575	85.7651	16.2724	7
ENSMUSG00000001415	BC024683	4.7036	8.46497	3	0	0	67.9843	43.8986	15.2239	8
ENSMUSG00000001417	Rhbg	3.56206	5.12664	0	0	0	7.03387	5.59893	9.38688	0
ENSMUSG00000001419	Mef2d	4.71683	8.0639	0	0	0	56.832	32.6676	14.7231	17
ENSMUSG00000001424	AL033314	8.67394	9.08563	14	1	0	364.269	150.715	82.5442	6
ENSMUSG00000001440	Kpnb1	4.80256	11.3631	5	0	0	169.869	210.144	20.2556	6
ENSMUSG00000001441	Npepps	6.20224	9.00879	9	0	3	165.772	103.605	25.2697	131
ENSMUSG00000001444	Tbx21	4.11453	2.17077	0	0	0	3.354	4.15412	7.6975	0
ENSMUSG00000001467	Cyp51	4.54269	8.25833	0	0	0	55.4366	35.1477	14.4385	0
ENSMUSG00000001472	D8Ertd325e	4.90939	6.28059	2	0	0	27.8048	12.0325	13.1034	10
ENSMUSG00000001473	Tubb6	3.58868	11.3162	1	0	0	67.6831	115.084	16.505	0
ENSMUSG00000001482	Def8	4.3864	7.87383	1	0	0	41.071	24.4481	13.5267	14
ENSMUSG00000001493	Meox1	4.07425	2.05837	0	0	0	3.06338	3.85211	7.57258	7
ENSMUSG00000001494	Sost	2.1635	4.28282	0	0	0	2.36012	2.34596	8.25013	0
ENSMUSG00000001496	Titf1	2.30859	1.94929	0	0	0	0.898561	1.2797	6.66409	0
ENSMUSG00000001497	Pax9	3.9607	3.88817	0	0	0	6.47234	6.78183	8.79465	0
ENSMUSG00000001506	Col1a1	3.96347	7.95214	0	0	0	30.6424	21.1322	12.7219	0
ENSMUSG00000001507	Itga3	5.01074	9.2925	0	0	0	113.25	85.893	17.6683	4
ENSMUSG00000001508	Sgca	3.41251	2.3034	0	0	1	2.07845	3.0427	7.16659	0
ENSMUSG00000001510	Dlx3	4.12573	5.90627	0	0	0	14.0297	7.86051	10.8225	0
ENSMUSG00000001517	Foxm1	4.42667	7.75036	0	0	0	39.8091	22.6783	13.4774	1
ENSMUSG00000001520	Nrip2	3.08508	8.08169	0	0	0	17.0552	14.2606	11.8351	0
ENSMUSG00000001524	Gtf2h4	2.57894	9.49053	0	0	0	22.5826	26.8803	13.2225	0
ENSMUSG00000001525	Tubb5	1.77695	11.4936	0	0	0	25.3289	38.3764	16.0562	7
ENSMUSG00000001542	Ell2	3.1398	10.0031	0	0	0	36.758	50.3958	14.1337	8
ENSMUSG00000001555	Fkbp10	3.19046	6.15992	0	0	0	7.54313	4.95101	10.0035	2
ENSMUSG00000001558	Klhl10	3.91657	2.5269	0	0	0	3.43283	4.43543	7.72597	0
ENSMUSG00000001566	Hlxb9	2.38128	2.04044	0	0	0	0.976374	1.40726	6.71738	0
ENSMUSG00000001583	Tnk1	2.94972	2.5043	0	0	0	1.69203	2.5308	7.08733	0
ENSMUSG00000001588	Centb1	3.80457	3.60306	0	0	0	5.12149	5.97651	8.39691	5
ENSMUSG00000001627	Ifrd1	4.43429	10.2076	2	0	0	103.572	110.763	16.8685	3
ENSMUSG00000001630	Stk38l	5.74698	7.2857	2	0	0	63.424	26.4028	18.3478	3
ENSMUSG00000001632	Brpf1	4.15113	8.49098	0	0	0	45.8709	34.8122	13.7383	2
ENSMUSG00000001655	Hoxc13	2.94186	2.39292	0	0	0	1.59206	2.39503	7.01369	0
ENSMUSG00000001657	Hoxc8	1.60312	3.04207	0	0	0	1.15807	1.25863	7.51832	1
ENSMUSG00000001661	Hoxc6	1.1865	4.164	0	0	0	1.5849	1.154	8.54785	0
ENSMUSG00000001663	Gstt1	3.8846	2.34356	0	0	0	3.0505	4.01467	7.56637	2
ENSMUSG00000001670	Tat	3.22419	2.13052	0	0	0	1.66703	2.50834	6.95519	0
ENSMUSG00000001674	Ddx18	3.81721	10.2048	0	0	0	63.7872	81.6673	15.3101	1
ENSMUSG00000001707	Eef1e1	3.73552	11.3278	1	0	0	76.0031	125.218	16.7875	7
ENSMUSG00000001729	Akt1	4.35396	8.56035	0	0	0	55.3551	40.3037	14.3109	2
ENSMUSG00000001751	Naglu	2.91648	2.33773	0	0	0	1.52439	2.29805	6.97132	0
ENSMUSG00000001755	Coasy	2.00432	5.75406	0	0	0	3.47072	2.14094	9.46217	0
ENSMUSG00000001761	Smo	4.69248	8.88346	0	0	0	80.5431	58.4449	15.7742	0
ENSMUSG00000001763	Tspan33	4.60407	2.16911	0	0	0	4.8401	5.20605	8.41493	0
ENSMUSG00000001768	Rin2	6.66495	3.66001	0	0	0	23.5626	16.6422	18.731	1
ENSMUSG00000001773	Folh1	5.98395	2.60234	0	0	0	11.6138	10.2019	13.0298	0
ENSMUSG00000001774	Chordc1	4.44188	9.86458	2	0	0	94.7357	93.5574	16.3753	0
ENSMUSG00000001783	D10Wsu52e	4.2598	9.51836	0	0	0	74.1331	71.156	15.3537	0
ENSMUSG00000001785	Pwp1	4.10702	10.0102	0	0	0	76.2951	86.0489	15.6605	1
ENSMUSG00000001819	Hoxd13	1.71765	5.99473	0	0	0	3.36021	1.80583	9.77357	0
ENSMUSG00000001823	Hoxd12	1.38902	2.8555	0	0	0	0.98736	1.00535	7.48492	0
ENSMUSG00000001829	Skd3	7.03821	5.39598	0	0	0	46.7724	18.8298	25.8122	2
ENSMUSG00000001833	7-Sep	5.80248	11.2008	2	0	0	262.051	278.575	26.6736	4
ENSMUSG00000001847	Rac1	4.4955	10.3802	0	0	0	113.132	123.492	17.3397	26
ENSMUSG00000001852	Kdelr2	4.12458	10.2576	1	0	1	82.6522	97.9856	16.0598	6
ENSMUSG00000001865	Cpa3	4.73145	2.40129	0	0	0	5.93174	6.13262	8.83598	0
ENSMUSG00000001870	Ltbp1	8.60454	6.50375	0	0	2	109.204	26.7705	62.8559	1
ENSMUSG00000001891	Ugp2	5.64553	4.34826	0	0	0	21.0584	13.8083	13.5887	2
ENSMUSG00000001909	D8Ertd812e	3.40803	8.70121	1	1	0	28.1474	27.1979	12.8025	4
ENSMUSG00000001910	Btbd14b	4.12978	9.09448	2	0	0	57.707	51.8219	14.4629	10
ENSMUSG00000001924	Ube1x	4.62988	11.1938	0	0	0	147.619	183.783	19.1911	2
ENSMUSG00000001986	Gria3	8.11455	3.50542	0	0	0	34.5394	19.5222	36.8168	0
ENSMUSG00000001988	Npas1	4.31962	2.15771	0	0	0	3.91037	4.55544	7.9552	0
ENSMUSG00000001995	Sipa1l2	7.2449	6.1244	0	0	0	63.4352	21.0631	30.3237	0
ENSMUSG00000001999	Blvra	4.7229	5.78671	0	0	0	20.881	10.1526	11.9907	16
ENSMUSG00000002006	Pdzk4	4.9534	7.48088	2	0	0	49.031	23.1894	14.7723	17
ENSMUSG00000002010	Idh3g	2.98823	10.3911	0	0	0	36.9422	55.4177	14.5231	14
ENSMUSG00000002015	Bcap31	4.90655	10.2279	0	0	0	142.064	136.53	18.7348	6
ENSMUSG00000002020	Ltbp2	6.52799	2.74342	0	0	0	15.008	12.2816	16.2812	0
ENSMUSG00000002028	Mll	6.25399	6.61173	1	0	0	55.5491	20.5206	20.7372	1
ENSMUSG00000002032	Tmem25	2.44864	3.40672	0	0	0	1.94913	2.53127	7.60455	0
ENSMUSG00000002043	Trappc6a	2.8922	6.55109	0	0	0	7.27905	4.67305	10.2083	0
ENSMUSG00000002052	Supt6h	5.2721	8.03754	2	0	0	75.7986	39.5306	16.9322	3
ENSMUSG00000002057	Foxn1	4.82125	2.23339	0	0	0	5.75442	5.87927	8.88465	1
ENSMUSG00000002058	Unc119	2.35727	6.32899	0	0	0	4.98826	3.05204	9.91386	0
ENSMUSG00000002059	Rab34	1.90651	8.56548	0	0	0	11.6125	9.39904	12.249	6
ENSMUSG00000002064	Sdf2	3.28407	9.25261	0	0	0	31.9295	36.1863	13.3295	31
ENSMUSG00000002076	Hsf2bp	6.49371	6.93665	0	0	0	69.6963	25.5164	23.4888	8
ENSMUSG00000002100	Mybpc3	4.19787	5.34688	0	0	0	12.4219	7.80593	10.4065	1
ENSMUSG00000002102	Psmc3	3.58712	10.8623	0	0	0	62.0762	96.5308	15.8364	3
ENSMUSG00000002103	Acp2	3.35332	5.50982	0	0	0	6.78507	5.00455	9.54076	2
ENSMUSG00000002105	Slc39a13	3.0757	7.12586	0	0	0	10.5808	7.09676	10.8463	2
ENSMUSG00000002107	Cugbp2	7.49021	2.94421	1	0	0	22.428	15.5104	25.5356	0
ENSMUSG00000002111	Sfpi1	4.24489	2.73329	0	0	0	4.93162	5.69786	8.27378	0
ENSMUSG00000002129	Sf3a1	6.58319	9.44381	0	0	0	220.519	146.945	30.5949	8
ENSMUSG00000002147	Stat6	4.15202	6.32625	0	0	0	16.6685	8.73615	11.2897	4
ENSMUSG00000002221	Paxip1	5.6632	8.19502	3	0	0	96.1848	50.5248	19.3777	2
ENSMUSG00000002228	Ppm1j	2.30071	2.33605	0	0	0	1.0945	1.53856	6.90252	0
ENSMUSG00000002233	Rhoc	2.43989	7.91768	0	0	0	10.9029	8.34407	11.451	10
ENSMUSG00000002250	Ppard	7.54605	6.48516	1	0	0	79.8744	24.3677	36.182	15
ENSMUSG00000002257	Def6	4.37643	6.78856	0	0	0	24.0607	11.7478	12.2355	5
ENSMUSG00000002274	Metrn	1.30743	8.71414	0	0	0	10.0014	6.74971	12.8065	0
ENSMUSG00000002290	Rab11b	3.77653	9.89665	0	0	0	56.7445	68.5034	14.8143	8
ENSMUSG00000002326	Gmpr2	2.80012	7.40333	0	0	0	10.2513	7.20452	10.9941	10
ENSMUSG00000002332	Dhrs1	2.71699	7.96782	0	0	0	12.9415	10.3899	11.5456	2
ENSMUSG00000002342	BC021367	3.49249	7.73516	0	0	0	19.0525	13.9086	11.8154	2
ENSMUSG00000002343	Armc6	3.83512	8.19833	0	0	0	31.1494	23.8526	12.7901	9
ENSMUSG00000002365	Snx9	6.44095	6.88127	0	0	0	66.7369	24.46	22.8769	27
ENSMUSG00000002393	Nr2f6	2.91476	7.4215	0	0	0	11.067	7.8423	11.0571	0
ENSMUSG00000002428	Smarca3	5.91934	9.35359	0	0	0	170.113	119.321	23.4952	0
ENSMUSG00000002459	Rgs20	6.77879	3.57114	0	0	0	23.6043	16.7066	19.5052	0
ENSMUSG00000002475	Abhd3	5.96084	3.41377	0	0	0	16.7428	13.4328	13.9094	0
ENSMUSG00000002489	Tiam1	8.4784	6.94817	0	0	0	128.274	32.9972	61.0901	2
ENSMUSG00000002500	Rpl3l	1.92524	2.66955	0	0	0	1.09647	1.37574	7.1691	2
ENSMUSG00000002504	Slc9a3r2	3.47301	7.64608	0	0	1	17.9652	12.8702	11.6995	6
ENSMUSG00000002550	Uck1	2.34028	7.01568	0	0	0	6.66003	4.13719	10.552	1
ENSMUSG00000002578	Zfpn1a4	3.74545	4.28283	0	0	0	6.25017	6.22327	8.86823	0
ENSMUSG00000002588	Pon1	4.68061	2.4107	0	0	0	5.76731	6.0297	8.74408	0
ENSMUSG00000002602	Axl	4.96795	5.84518	0	0	0	24.6115	11.2742	12.7814	0
ENSMUSG00000002603	Tgfb1	4.1589	3.53536	0	0	0	6.61071	7.05712	8.77335	0
ENSMUSG00000002608	D7Ertd462e	2.98859	6.46299	0	0	0	7.44371	4.79496	10.1685	1
ENSMUSG00000002625	Akap8l	4.86646	7.4216	0	0	0	45.3178	21.4886	14.3815	3
ENSMUSG00000002633	Shh	3.36275	9.23218	0	0	0	33.488	37.4148	13.3848	0
ENSMUSG00000002658	Gtf2f1	3.00342	9.33528	0	0	0	27.3503	32.1316	13.2057	6
ENSMUSG00000002660	Clpp	2.55655	9.38301	0	0	0	21.5255	24.885	13.0905	7
ENSMUSG00000002679	Med6	4.42921	9.02182	1	0	0	70.7117	57.0104	15.133	1
ENSMUSG00000002688	Prkcm	8.26623	4.65252	0	0	0	53.9502	21.7003	44.259	0
ENSMUSG00000002699	Lcp2	5.49627	3.22161	0	0	0	12.9344	11.1286	11.697	0
ENSMUSG00000002718	Cse1l	5.33181	10.9208	2	0	0	205.961	216.064	22.3813	10
ENSMUSG00000002728	Nat5	3.70907	10.4336	2	0	0	62.0171	85.7895	15.4323	18
ENSMUSG00000002731	Prkra	4.17505	6.51631	0	0	0	18.3106	9.43556	11.5286	0
ENSMUSG00000002732	Fkbp7	3.32582	4.83793	0	0	0	5.4299	4.91395	8.95728	0
ENSMUSG00000002733	Plekha3	4.41136	8.4093	0	0	0	54.0348	37.0886	14.2665	6
ENSMUSG00000002748	Baz1b	5.86982	9.26162	2	0	0	161.82	111.414	22.8973	2
ENSMUSG00000002763	Pex6	3.83026	6.8483	0	0	0	16.0738	9.25428	11.3084	0
ENSMUSG00000002767	Mrpl2	1.95791	10.4259	0	0	0	22.0183	28.4882	14.4778	18
ENSMUSG00000002768	Mea1	0.905351	9.43492	1	0	0	11.6985	7.86399	14.1088	5
ENSMUSG00000002769	Gnmt	1.80818	3.77886	0	0	0	1.70453	1.75501	7.96228	0
ENSMUSG00000002799	Jag2	4.43716	7.14871	0	0	0	29.7956	14.8914	12.7868	0
ENSMUSG00000002803	Btbd6	1.25278	3.37027	0	0	0	1.19422	1.07399	7.91551	0
ENSMUSG00000002804	Nudt14	2.88616	6.47108	0	0	0	7.01784	4.51299	10.1321	0
ENSMUSG00000002808	Epdr2	4.8124	5.44331	0	0	0	19.7927	10.28	11.8643	0
ENSMUSG00000002812	Fliih	3.70852	9.03386	0	0	0	40.3303	40.1147	13.5906	2
ENSMUSG00000002814	Top3a	5.22137	6.53488	1	0	0	36.131	14.7272	14.562	3
ENSMUSG00000002820	Atg4d	3.25384	6.31612	0	0	0	8.34628	5.35898	10.1894	0
ENSMUSG00000002833	Hdgfrp2	4.38322	7.15022	4	0	0	28.6436	14.5433	12.6596	4
ENSMUSG00000002844	Adprh	2.85718	9.3816	0	0	1	25.4348	30.1565	13.1809	8
ENSMUSG00000002845	Tmem39a	4.82838	8.66409	0	2	0	80.1294	53.2417	15.952	66
ENSMUSG00000002847	Pla1a	5.21047	3.05955	0	0	0	10.6087	9.60276	10.5906	6
ENSMUSG00000002870	Mcm2	3.92865	11.3262	0	0	0	88.6005	138.546	17.197	1
ENSMUSG00000002881	Nab1	5.40667	7.16227	0	0	0	52.1931	21.9139	16.2721	0
ENSMUSG00000002900	Lamb1-1	6.02321	9.81448	0	0	0	204.648	158.815	25.4307	4
ENSMUSG00000002908	Kcnn1	3.75243	3.04335	0	0	0	3.86016	4.98497	7.93126	1
ENSMUSG00000002910	Arrdc2	2.19724	4.00779	0	0	0	2.18238	2.36521	8.04247	0
ENSMUSG00000002930	Gsbs	3.92495	6.3456	0	0	0	14.011	7.84059	10.9381	0
ENSMUSG00000002944	Cd36	6.75061	3.57427	0	0	0	23.4181	16.6313	19.2757	0
ENSMUSG00000002948	Map2k7	3.65444	7.64992	0	0	0	20.6496	14.279	11.9153	0
ENSMUSG00000002949	Timm44	4.01418	8.32713	0	0	0	38.1835	28.8248	13.2572	3
ENSMUSG00000002957	Ap2a2	6.14521	8.16522	2	0	0	112.863	56.2804	22.9074	6
ENSMUSG00000002968	Med25	3.71172	7.69657	0	0	0	22.1008	15.252	12.0418	4
ENSMUSG00000002981	Clptm1	4.98959	9.68166	0	0	0	127.362	106.546	18.2042	0
ENSMUSG00000002983	Relb	4.53711	4.74097	0	0	0	13.3555	9.17232	10.4811	1
ENSMUSG00000002996	Hbp1	4.59138	9.01877	1	0	0	79.3286	61.1421	15.626	8
ENSMUSG00000002997	Prkar2b	6.69409	3.42414	0	0	0	21.6067	15.8987	18.5618	0
ENSMUSG00000003031	Cdkn1b	1.96014	8.03608	0	0	0	9.28445	6.57791	11.6543	2
ENSMUSG00000003032	Klf4	2.37907	9.67434	0	0	0	21.6361	26.1086	13.4296	1
ENSMUSG00000003033	Ap1m1	4.11353	8.11767	0	0	0	37.4377	25.8576	13.2025	0
ENSMUSG00000003037	Rab8a	4.23089	9.14669	1	0	0	63.7067	56.2379	14.772	0
ENSMUSG00000003051	Elf3	2.28096	7.05747	0	0	0	6.60425	4.0766	10.5963	0
ENSMUSG00000003070	Efna2	3.32005	7.27331	0	0	0	13.3822	9.03922	11.1678	4
ENSMUSG00000003099	Ppp5c	4.53817	9.28895	1	0	0	84.3926	70.6641	15.8396	2
ENSMUSG00000003119	Crk7	5.85848	8.32309	3	0	0	109.817	58.8425	20.9448	4
ENSMUSG00000003123	Lipe	4.04116	2.37949	0	0	0	3.52145	4.42248	7.75814	0
ENSMUSG00000003131	Pafah1b2	4.20649	8.12038	1	0	0	40.3408	27.1131	13.4037	18
ENSMUSG00000003135	D1Bwg0212e	3.47119	9.14115	0	0	0	35.0368	37.638	13.3973	0
ENSMUSG00000003153	Slc2a3	3.87725	10.1546	2	0	0	66.0376	82.2577	15.3573	32
ENSMUSG00000003154	Foxj2	4.66408	6.7249	0	0	1	28.7019	12.9219	12.8877	0
ENSMUSG00000003166	Dgcr2	5.68117	7.56942	0	0	0	71.2164	31.6518	18.417	2
ENSMUSG00000003190	Bcl2l12	2.90458	2.65672	0	0	2	1.77559	2.62773	7.17267	2
ENSMUSG00000003200	Sh3gl1	4.30947	7.9945	0	0	0	41.109	25.8654	13.4867	6
ENSMUSG00000003226	Ranbp2	5.56888	10.1092	1	0	0	188.082	162.392	22.3599	7
ENSMUSG00000003227	Edar	6.2273	3.00225	0	0	0	15.3173	12.6722	14.7923	0
ENSMUSG00000003233	Dvl3	3.86146	2.03076	0	0	0	2.54689	3.4078	7.33257	0
ENSMUSG00000003234	Abcf3	3.67129	7.69066	1	0	0	21.3508	14.8552	11.9813	0
ENSMUSG00000003235	Eif2b5	3.39328	9.82569	0	0	0	41.5468	53.3681	14.1605	0
ENSMUSG00000003273	Car11	2.23511	5.77291	0	0	0	3.86596	2.51587	9.43486	1
ENSMUSG00000003279	Dlgap1	8.63056	3.6497	0	0	2	42.331	20.7828	49.212	31
ENSMUSG00000003282	Plag1	5.16084	2.47779	0	0	0	7.82955	7.49267	9.90839	1
ENSMUSG00000003283	Hck	5.42388	7.22189	0	0	0	54.12	22.912	16.4459	3
ENSMUSG00000003299	Mrpl4	2.60644	9.56871	0	0	0	23.5079	28.6099	13.3219	39
ENSMUSG00000003308	Keap1	3.26333	6.50338	0	0	0	9.04898	5.7442	10.371	13
ENSMUSG00000003309	Ap1m2	4.27791	8.90232	0	0	0	60.1974	49.1749	14.5642	1
ENSMUSG00000003316	Glg1	6.69149	7.5447	0	0	0	100.034	39.6639	26.9487	4
ENSMUSG00000003344	Btbd2	2.61259	7.29805	0	0	0	8.76792	5.93869	10.8422	3
ENSMUSG00000003346	D10Bwg1364	1.58928	9.23028	0	0	0	13.4087	11.6124	13.1924	1
ENSMUSG00000003348	Mobkl2a	4.05041	5.46575	0	0	0	11.4625	7.28401	10.2798	3
ENSMUSG00000003352	Cacnb3	3.23189	6.58968	0	0	0	9.18227	5.83951	10.4298	4
ENSMUSG00000003363	Pld3	4.35135	8.08198	0	0	0	44.2867	28.1984	13.6964	12
ENSMUSG00000003382	Etv3	3.80147	7.362	0	0	0	20.0864	12.5586	11.8059	0
ENSMUSG00000003410	Elavl3	5.13566	6.20213	0	0	0	30.4335	12.8284	13.7972	2
ENSMUSG00000003411	Rab3b	6.00574	6.25528	0	0	0	44.1544	17.0224	18.2948	7
ENSMUSG00000003418	st8sia6	7.21776	2.60636	0	0	0	17.532	13.0843	21.7589	0
ENSMUSG00000003421	Nosip	3.93782	8.56777	0	0	0	40.0227	33.0517	13.4054	96
ENSMUSG00000003435	Supt5h	4.63674	10.583	2	0	1	130.99	143.866	18.1829	8
ENSMUSG00000003436	Dll3	3.30845	4.19513	0	0	0	4.38107	4.85567	8.43864	1
ENSMUSG00000003444	Ixl	2.62199	7.83375	0	0	1	11.4988	8.82302	11.384	1
ENSMUSG00000003458	Ncstn	4.06428	7.44457	1	0	0	25.8143	15.2381	12.3273	1
ENSMUSG00000003464	Pex19	3.28333	7.62486	1	0	0	15.5303	11.3567	11.4985	1
ENSMUSG00000003476	Crhr2	5.42243	4.75442	0	0	0	21.8547	12.8599	13.1408	0
ENSMUSG00000003484	Cyp4f18	4.43109	3.72243	0	0	0	8.77704	8.31707	9.35889	0
ENSMUSG00000003500	Impdh1	3.99222	8.37711	0	0	0	38.3917	29.5855	13.2756	0
ENSMUSG00000003518	Dusp3	3.49429	6.24602	0	0	0	9.64245	6.03528	10.3236	0
ENSMUSG00000003526	Prodh	4.12284	8.45958	0	0	0	44.2301	33.5576	13.6383	0
ENSMUSG00000003527	Es2el	3.40667	7.42307	0	0	0	15.3199	10.5398	11.3991	0
ENSMUSG00000003528	Slc25a1	1.5612	9.36846	0	0	0	13.9372	12.3615	13.3791	1
ENSMUSG00000003534	Ddr1	4.58129	8.82146	0	0	0	72.8955	53.4783	15.3165	2
ENSMUSG00000003545	Fosb	2.19912	2.27826	0	0	0	1.01361	1.39723	6.87408	0
ENSMUSG00000003546	Knsl8	3.87115	5.17017	0	0	0	9.07629	6.61435	9.76174	4
ENSMUSG00000003549	Ercc1	3.51412	8.56612	2	0	0	28.7176	26.2759	12.7664	4
ENSMUSG00000003573	Homer3	3.51627	5.61167	1	0	0	7.88592	5.52438	9.76606	9
ENSMUSG00000003575	Mect1	5.84341	2.02158	1	0	0	8.20768	7.48201	11.7611	1
ENSMUSG00000003585	Sec14l2	4.43956	5.43858	0	0	0	15.3659	8.7618	10.9537	1
ENSMUSG00000003617	Cp	5.63877	3.73786	0	0	0	16.9522	13.1196	12.8281	0
ENSMUSG00000003623	Crot	4.95991	7.86774	0	0	0	59.6505	30.996	15.3252	0
ENSMUSG00000003644	Rps6ka1	5.33953	9.22771	5	0	0	129.752	92.8552	19.2373	4
ENSMUSG00000003660	Ascc3l1	5.00306	10.9489	2	0	0	176.543	194.283	20.4934	0
ENSMUSG00000003662	Wdr39	2.7666	9.15505	0	0	0	22.2738	24.83	12.8757	1
ENSMUSG00000003665	Has1	3.56876	5.38453	0	0	0	7.64382	5.63085	9.61552	0
ENSMUSG00000003675	Rom1	0.84559	4.87469	0	0	0	1.80685	0.89262	9.37708	0
ENSMUSG00000003680	Taf6l	3.79618	7.33826	1	0	0	19.7693	12.3194	11.7729	7
ENSMUSG00000003682	B3gat3	2.77484	7.50044	0	0	0	10.6028	7.59772	11.0831	2
ENSMUSG00000003693	Polr2g	2.44599	10.3122	0	0	0	26.7498	37.7445	14.2306	14
ENSMUSG00000003721	Insig2	4.81906	8.3041	0	0	0	67.8875	40.8649	15.4053	0
ENSMUSG00000003731	Kpna6	4.66027	5.20632	0	0	0	16.7207	9.61566	11.2193	1
ENSMUSG00000003746	Man1a	7.40699	5.40975	0	0	0	52.6827	19.863	30.6839	0
ENSMUSG00000003762	Adck4	4.63413	4.80327	0	0	0	14.5555	9.55623	10.7556	6
ENSMUSG00000003778	Brd8	4.69822	5.30081	1	0	0	17.6402	9.77671	11.4105	3
ENSMUSG00000003809	Gcdh	2.86037	5.51681	0	0	0	4.94358	3.71696	9.28281	0
ENSMUSG00000003810	Mast2	7.29541	8.47693	2	0	0	190.126	88.2433	38.4402	5
ENSMUSG00000003813	Rad23a	2.584	9.28627	0	0	0	21.1188	23.9175	12.9805	2
ENSMUSG00000003849	Nqo1	3.91188	3.27553	0	0	0	4.86308	5.83399	8.26389	5
ENSMUSG00000003865	Gys1	4.44002	6.75826	0	0	0	24.8877	11.9091	12.3484	7
ENSMUSG00000003868	Ruvbl2	4.0072	10.974	0	0	0	88.4507	126.179	16.8396	4
ENSMUSG00000003872	Lin7b	1.13093	4.21386	0	0	0	1.58585	1.10916	8.62286	0
ENSMUSG00000003873	Bax	2.35304	10.765	0	0	0	28.3743	43.3498	14.8278	12
ENSMUSG00000003934	Efnb3	2.59789	6.21397	0	0	0	5.3981	3.46548	9.82415	0
ENSMUSG00000003948	Mmd	6.50607	6.50293	0	0	0	57.8209	20.7455	22.6964	0
ENSMUSG00000003949	Hlf	5.70959	3.01307	0	0	0	12.794	11.0968	12.2955	0
ENSMUSG00000003970	Rpl8	1.1551	2.19345	0	0	0	0.660943	0.631817	7.16507	7
ENSMUSG00000003974	Grm3	7.92417	2.78017	0	0	0	23.6057	15.2626	31.2357	0
ENSMUSG00000003992	Ssbp2	7.48345	2.28523	0	0	0	16.182	11.7276	23.9747	0
ENSMUSG00000004032	Gstm5	1.50843	7.31823	0	0	0	5.49295	2.79821	11.1407	0
ENSMUSG00000004035	Gstm7	2.4359	4.86621	0	0	0	3.22148	2.81548	8.68115	0
ENSMUSG00000004040	Stat3	5.76307	8.16847	1	0	0	98.6089	50.9821	19.9866	15
ENSMUSG00000004044	Ptrf	3.59252	3.67534	0	0	0	4.46599	5.40137	8.25369	1
ENSMUSG00000004054	Map3k11	3.71105	6.8254	0	0	0	14.4762	8.57816	11.1256	0
ENSMUSG00000004056	Akt2	5.62202	2.37872	1	0	0	9.08769	8.34016	11.2779	23
ENSMUSG00000004098	Col5a3	5.48559	6.50325	0	0	0	40.0392	15.8893	15.7025	1
ENSMUSG00000004105	Angptl2	4.92457	4.76089	0	0	0	17.1924	10.7656	11.4583	0
ENSMUSG00000004110	Cacna1e	8.36619	2.35174	0	0	0	21.6618	13.1208	37.8894	0
ENSMUSG00000004127	Rg9mtd2	6.47254	8.50735	0	0	1	147.834	78.2148	26.8552	0
ENSMUSG00000004221	Ikbkg	4.75002	6.02667	0	0	0	23.0452	10.6377	12.33	0
ENSMUSG00000004233	Wars2	6.30586	4.69286	0	0	0	29.7179	16.4216	17.7776	0
ENSMUSG00000004266	Ptpn6	3.63238	6.56811	0	0	0	12.1657	7.27306	10.7758	0
ENSMUSG00000004268	Grcc2f	2.97911	11.7906	0	0	0	47.869	94.7306	16.4829	20
ENSMUSG00000004270	Grcc3f	5.36681	7.9296	0	0	0	74.9977	37.5879	17.2383	2
ENSMUSG00000004285	Atp6v1f	1.44731	10.9454	0	0	1	20.4291	24.6188	15.5395	14
ENSMUSG00000004317	Clcn5	4.86859	2.45286	0	0	0	6.61836	6.63657	9.16648	2
ENSMUSG00000004319	Clcn3	6.17658	8.9142	0	0	0	158.376	96.8266	24.8105	37
ENSMUSG00000004328	Hif3a	4.3886	2.28735	0	0	0	4.40529	5.00647	8.15078	0
ENSMUSG00000004347	Pde1c	8.22785	6.1469	0	0	0	85.6188	23.4733	49.6653	0
ENSMUSG00000004364	Cul3	5.8178	10.4216	3	0	0	223.833	202.641	24.9839	3
ENSMUSG00000004366	Sst	0.337996	1.77674	0	0	0	0.435179	0.271989	7.44695	0
ENSMUSG00000004371	Il11	1.78534	3.44701	0	0	0	1.47975	1.61733	7.73328	1
ENSMUSG00000004383	Large	9.06764	7.2329	1	0	0	172.674	40.3718	86.9946	1
ENSMUSG00000004393	Ddx56	3.34837	8.44725	1	0	0	24.1593	21.9375	12.4504	1
ENSMUSG00000004394	Tmed4	2.04754	7.68317	0	0	0	8.09123	5.34977	11.2597	0
ENSMUSG00000004460	Dnajb11	3.85848	8.64655	0	0	0	38.8576	33.5309	13.3606	0
ENSMUSG00000004473	Clec11a	1.58304	2.01037	0	0	0	0.688763	0.792531	6.85364	0
ENSMUSG00000004508	Gab2	7.83558	5.6455	0	0	0	64.4858	21.0983	38.7235	0
ENSMUSG00000004530	Coro1c	6.05041	5.0967	1	1	0	30.7155	15.3433	16.7396	12
ENSMUSG00000004535	Tax1bp1	5.70948	10.1902	1	0	0	202.873	176.231	23.5826	2
ENSMUSG00000004552	Ctse	5.21692	6.34486	0	0	0	33.4077	13.7455	14.2951	0
ENSMUSG00000004558	Ndrg2	3.01275	6.26939	0	0	0	7.00535	4.57327	10.0029	1
ENSMUSG00000004591	Pkn2	6.48198	8.39719	1	0	0	141.144	72.3129	26.6901	11
ENSMUSG00000004610	Etfb	3.77368	8.88604	0	0	0	40.084	37.7349	13.5115	4
ENSMUSG00000004613	Lim2	2.55851	4.30236	0	0	0	2.87824	3.06008	8.25525	2
ENSMUSG00000004633	Chn2	5.19472	2.84749	0	0	0	9.53703	8.84539	10.3431	0
ENSMUSG00000004637	Wwox	9.8331	3.57893	6	0	0	56.6615	21.0477	97.4483	0
ENSMUSG00000004642	Slbp	3.61553	10.6858	0	0	0	61.1112	91.0965	15.6302	4
ENSMUSG00000004651	Tyr	6.04455	3.42838	0	0	0	17.3534	13.7785	14.3569	0
ENSMUSG00000004654	Ghrhr	3.60739	4.13438	0	0	0	5.34153	5.73726	8.61787	0
ENSMUSG00000004655	Aqp1	3.59979	2.30608	0	0	0	2.3924	3.38535	7.29467	0
ENSMUSG00000004661	Arid3b	5.53459	6.79769	3	0	0	46.3784	18.4438	16.3769	38
ENSMUSG00000004665	Cnn2	2.75916	11.7979	0	0	0	42.0682	82.7207	16.3621	2
ENSMUSG00000004677	Myo9b	6.11485	8.40449	4	0	0	124.867	66.8436	23.1455	0
ENSMUSG00000004698	Hdac9	8.60447	3.00547	0	0	0	31.8434	17.4103	45.757	0
ENSMUSG00000004768	Rab23	4.43309	4.96814	1	0	0	13.2651	8.72142	10.483	5
ENSMUSG00000004771	Rab11a	4.47735	6.92194	2	0	0	27.5568	13.2195	12.624	0
ENSMUSG00000004788	Eif2b2	2.83107	3.64837	2	0	0	2.64826	3.42111	7.82714	0
ENSMUSG00000004789	Dlst	4.5855	9.40431	0	0	0	90.7861	77.2548	16.1626	1
ENSMUSG00000004798	Ulk2	6.30301	5.08808	0	0	2	33.4464	16.3092	18.4063	1
ENSMUSG00000004815	Dgkq	3.81957	2.19901	0	0	0	2.68904	3.62231	7.40608	0
ENSMUSG00000004837	Grap	4.28222	3.60989	0	0	0	7.50239	7.6054	9.01636	0
ENSMUSG00000004843	Chmp2b	4.56712	8.98408	1	0	0	76.9713	59.164	15.4987	0
ENSMUSG00000004846	Plod3	3.25081	7.12457	0	0	0	11.8689	7.87468	10.9628	1
ENSMUSG00000004849	Ap1s1	3.46819	7.25308	0	0	0	14.733	9.71014	11.2847	9
ENSMUSG00000004864	Mapk13	3.22497	7.0769	0	0	0	11.3993	7.52718	10.8962	1
ENSMUSG00000004865	Srpk1	5.03848	9.62153	1	0	0	128.27	104.986	18.3354	28
ENSMUSG00000004872	Pax3	6.55974	6.75947	0	0	0	65.7177	23.5136	23.7487	0
ENSMUSG00000004885	Crabp2	2.24823	6.50131	0	0	0	5.07277	3.00783	10.0781	2
ENSMUSG00000004892	Bcan	3.6819	2.71394	0	0	0	3.12536	4.23948	7.6361	0
ENSMUSG00000004894	Hapln2	2.50868	2.72673	0	0	0	1.47379	2.09774	7.15189	1
ENSMUSG00000004895	Prcc	4.71968	7.06967	5	0	0	34.8897	16.02	13.4615	19
ENSMUSG00000004896	BC023814	2.91073	4.22378	0	0	0	3.41938	3.82344	8.27078	0
ENSMUSG00000004897	Hdgf	3.28718	10.3328	0	0	0	44.2741	64.5621	14.7057	56
ENSMUSG00000004902	Slc25a18	3.02538	3.94262	0	0	0	3.32883	4.02661	8.10388	0
ENSMUSG00000004929	Thop1	3.63331	9.40008	2	0	0	43.3969	48.1857	13.9348	2
ENSMUSG00000004934	Pias4	3.35924	8.31697	1	0	0	22.9379	20.0473	12.3146	2
ENSMUSG00000004936	Map2k1	6.10461	9.42499	0	6	2	186.121	130.548	25.2947	49
ENSMUSG00000004937	Sgta	4.008	8.95016	0	0	0	49.5633	44.4575	14.0159	4
ENSMUSG00000004939	Itgb1bp3	1.51551	2.15406	0	0	0	0.725355	0.810252	6.9696	0
ENSMUSG00000004952	Rasa4	4.80256	2.03461	0	0	0	5.13076	5.29187	8.68757	5
ENSMUSG00000004961	Syt5	2.74996	5.94328	0	0	0	5.32908	3.61548	9.61594	0
ENSMUSG00000004980	Hnrpa2b1	3.1311	10.3712	2	4	0	40.255	59.903	14.6063	13
ENSMUSG00000005034	Prkacb	6.3812	7.92452	0	0	0	108.914	49.4782	24.5545	1
ENSMUSG00000005043	Sgsh	3.59072	5.03647	0	0	0	6.99696	5.69372	9.33711	0
ENSMUSG00000005069	Pex5	4.1884	6.83943	0	0	0	21.2983	11.0398	11.8974	0
ENSMUSG00000005103	Wdr1	5.12321	10.7845	2	0	2	181.614	189.965	20.841	1
ENSMUSG00000005124	Wisp1	4.99127	6.89507	0	0	0	37.7087	16.1071	14.1428	0
ENSMUSG00000005125	Ndrg1	5.3335	6.92973	0	0	0	45.2748	18.5659	15.5886	0
ENSMUSG00000005148	Klf5	3.88088	11.504	0	0	3	87.8127	143.958	17.366	14
ENSMUSG00000005204	Senp3	3.16463	10.761	3	0	0	44.9947	72.5531	15.1628	0
ENSMUSG00000005220	Corin	7.67372	3.42434	0	0	0	29.3526	18.3756	29.1854	0
ENSMUSG00000005225	Plekha8	5.58442	2.9713	0	0	0	11.9593	10.5319	11.7575	0
ENSMUSG00000005232	G6pc2	2.9782	2.5595	0	0	0	1.76989	2.63887	7.13193	0
ENSMUSG00000005251	Ripk4	4.44513	7.00163	0	0	0	27.938	13.6464	12.6365	0
ENSMUSG00000005262	Ufd1l	4.51916	7.79874	1	0	0	43.6164	24.5182	13.7831	3
ENSMUSG00000005267	Zfp287	4.36744	5.10339	0	0	0	13.1533	8.44908	10.4831	0
ENSMUSG00000005299	Letm1	5.40538	7.54301	0	0	0	62.9293	28.4898	16.8376	0
ENSMUSG00000005320	Fgfr4	4.00845	2.29663	0	0	0	3.28854	4.18507	7.66345	0
ENSMUSG00000005338	Igsf4b	5.06359	5.06134	0	0	0	20.2816	11.2937	12.2021	0
ENSMUSG00000005357	Slc1a6	5.11412	2.99206	0	0	0	9.81339	9.06303	10.2504	0
ENSMUSG00000005360	Slc1a3	6.25948	3.91233	0	0	0	22.6169	15.8413	16.2661	22
ENSMUSG00000005362	Crbn	4.44778	7.67151	0	0	0	38.877	21.5824	13.4353	0
ENSMUSG00000005370	Msh6	3.9982	11.2981	0	3	1	93.2233	142.102	17.3199	2
ENSMUSG00000005371	Fbxo11	4.63517	9.15798	0	0	0	86.1042	68.0271	15.9719	1
ENSMUSG00000005374	Tbl2	3.698	7.28966	1	0	0	17.8647	11.3054	11.5873	0
ENSMUSG00000005397	Nid1	6.22045	8.02558	0	0	0	108.305	51.5207	23.274	0
ENSMUSG00000005410	Mcm5	4.21234	10.8965	0	0	0	102.491	135.366	17.2606	1
ENSMUSG00000005413	Hmox1	2.79992	8.86899	2	0	0	20.3488	21.1018	12.558	1
ENSMUSG00000005442	Cic	3.50297	8.31472	0	0	0	25.4317	21.7257	12.4655	2
ENSMUSG00000005447	Pafah1b3	1.53953	8.78452	0	0	0	11.1086	8.40577	12.7038	2
ENSMUSG00000005470	Asf1b	3.86116	8.15366	0	0	0	31.1331	23.3746	12.7806	2
ENSMUSG00000005474	Mylc2pl	6.20259	5.6419	0	0	0	38.2953	16.1572	18.6193	0
ENSMUSG00000005481	Bat1a	3.80064	11.7619	0	3	0	85.6327	150.501	17.5979	14
ENSMUSG00000005483	Dnajb1	1.89181	9.35892	0	0	0	15.7165	15.5894	13.1702	1
ENSMUSG00000005493	Msh4	5.60993	2.43119	0	0	0	9.28868	8.51161	11.2875	0
ENSMUSG00000005501	Usp40	5.98657	4.80632	0	0	0	27.52	15.1596	15.9298	1
ENSMUSG00000005503	Evx1	2.28718	4.75037	0	0	0	2.89366	2.55308	8.5942	0
ENSMUSG00000005505	Kbtbd4	2.53032	7.32366	0	0	0	8.50157	5.72695	10.8561	0
ENSMUSG00000005506	Cugbp1	6.25923	8.34049	3	4	0	127.489	65.9963	24.3087	58
ENSMUSG00000005510	Ndufs3	3.33428	10.2659	0	0	0	44.9828	64.3067	14.6683	3
ENSMUSG00000005514	Por	5.52882	6.37596	2	0	0	38.7194	15.3973	15.7334	31
ENSMUSG00000005533	Igf1r	8.09959	7.01252	1	0	0	118.769	33.3958	50.219	1
ENSMUSG00000005580	Adcy9	7.04726	5.41066	0	0	0	47.1186	18.8645	25.9525	1
ENSMUSG00000005609	Sh2bp1	4.77516	7.02403	0	0	0	35.3544	15.9408	13.576	0
ENSMUSG00000005610	Eif4g2	3.47236	12.3445	1	1	0	71.5651	149.98	17.9189	4
ENSMUSG00000005615	Pcyt1a	5.45233	4.97389	0	0	0	23.6444	12.9359	13.528	6
ENSMUSG00000005621	Zfp592	5.05697	7.15995	0	0	0	44.256	19.3643	14.7361	47
ENSMUSG00000005628	Tmod4	1.88557	4.06695	0	0	0	1.95067	1.91242	8.14937	1
ENSMUSG00000005629	Scnm1	2.09896	7.6216	0	0	0	8.02294	5.29623	11.1837	5
ENSMUSG00000005640	Insrr	4.25096	7.61567	0	0	0	32.5708	18.8985	12.8995	0
ENSMUSG00000005649	Cabp5	3.4264	2.91683	0	0	0	2.84016	3.97814	7.5858	0
ENSMUSG00000005667	Mthfd2	3.59	9.3576	0	0	0	41.3722	45.8852	13.8192	3
ENSMUSG00000005683	Cs	4.6234	10.2378	3	0	0	119.392	122.153	17.5721	10
ENSMUSG00000005686	Ampd3	5.31437	2.70854	0	0	0	9.42636	8.72613	10.5684	0
ENSMUSG00000005696	Sh2d1a	4.3906	2.90105	0	0	0	5.97334	6.51108	8.62079	0
ENSMUSG00000005698	Ctcf	5.53838	9.45885	3	0	0	152.788	113.619	20.8752	79
ENSMUSG00000005716	Pvalb	3.93045	2.28669	0	0	0	3.07376	4.00275	7.57355	1
ENSMUSG00000005718	Tcfap4	3.91294	6.12427	2	0	0	12.7742	7.34749	10.7033	23
ENSMUSG00000005732	Ranbp1	3.15818	13.0922	4	8	0	61.6497	151.715	18.7276	65
ENSMUSG00000005779	Psmb4	1.3835	12.3219	0	1	0	24.6603	37.389	17.6776	1
ENSMUSG00000005802	Slc30a4	4.42122	6.06258	0	0	0	18.6022	9.2885	11.5515	0
ENSMUSG00000005804	Pldn	3.26003	8.61493	0	0	0	24.4616	23.4986	12.5585	0
ENSMUSG00000005813	Metap1	4.92709	8.92758	6	0	0	94.4657	66.1456	16.7343	0
ENSMUSG00000005864	Cnga2	4.19724	2.13102	0	0	0	3.50725	4.24192	7.77171	0
ENSMUSG00000005871	Apc	6.60878	9.32895	2	0	1	213.847	138.048	30.6018	18
ENSMUSG00000005873	Dp1	4.83071	7.84973	0	0	0	54.9055	29.0631	14.8238	8
ENSMUSG00000005881	Sdbcag84	3.34653	8.97311	0	0	0	30.0612	31.49	13.057	0
ENSMUSG00000005886	Ncoa2	7.89374	7.64822	1	0	1	152.815	50.6046	47.8355	6
ENSMUSG00000005897	Nr2c1	5.56569	6.47018	1	0	0	40.7984	16.092	16.0549	9
ENSMUSG00000005907	Pex1	3.71578	6.76703	0	0	0	14.1528	8.34402	11.0728	0
ENSMUSG00000005917	Otx1	2.77631	4.34817	0	0	0	3.29195	3.52542	8.32615	0
ENSMUSG00000005949	Ctns	3.98977	4.73151	0	0	0	8.74554	7.07446	9.53294	0
ENSMUSG00000005951	Carkl	4.6453	4.00558	0	0	0	11.3387	9.46412	10.0285	0
ENSMUSG00000005952	Trpv1	4.47968	5.49025	0	0	0	16.0787	8.93913	11.091	0
ENSMUSG00000005958	Ephb3	4.21023	7.3419	0	0	0	27.5397	15.2326	12.4972	0
ENSMUSG00000005968	Tuft1	5.52507	5.44854	0	0	0	28.1208	13.2669	14.4463	0
ENSMUSG00000005973	Rcn1	3.62141	9.55204	0	0	0	45.2255	52.2477	14.1107	1
ENSMUSG00000005981	Trap1	5.24199	9.7811	1	0	0	148.964	123.253	19.6649	4
ENSMUSG00000005986	Ankrd13d	3.69555	2.23267	0	0	0	2.48105	3.44514	7.32087	0
ENSMUSG00000005994	Tyrp1	3.98286	4.80891	0	0	0	8.90391	7.04032	9.59076	0
ENSMUSG00000006005	Tpr	5.83162	9.86823	4	0	0	194.136	155.198	23.8738	4
ENSMUSG00000006007	Pdc	3.85699	3.10641	0	0	0	4.31674	5.38153	8.07979	0
ENSMUSG00000006010	BC003331	4.80085	6.83154	0	0	0	32.8434	14.4396	13.4208	4
ENSMUSG00000006095	Ckap1	2.9594	10.5722	0	0	0	37.8787	59.0543	14.7446	1
ENSMUSG00000006134	Crkl	5.09883	8.29187	0	0	0	78.7487	45.0853	16.513	2
ENSMUSG00000006154	Eps8l1	4.23358	1.9171	0	0	0	3.22513	3.87644	7.66845	0
ENSMUSG00000006169	AI642036	4.75377	10.246	1	0	0	130.284	129.532	18.0977	1
ENSMUSG00000006191	Cdkal1	9.05079	6.60926	8	0	0	128.878	28.4452	81.4247	4
ENSMUSG00000006205	Htra1	5.62714	6.96405	0	0	0	51.9247	20.7967	17.1264	4
ENSMUSG00000006215	Zbtb17	4.53897	7.38077	0	0	0	35.9299	18.2096	13.3232	16
ENSMUSG00000006221	Hspb7	1.81803	4.22982	0	0	0	2.00751	1.83871	8.29164	0
ENSMUSG00000006235	Epor	1.78031	5.0836	0	0	0	2.57825	1.78388	8.97336	0
ENSMUSG00000006269	Atp6v1b1	3.9813	2.11216	0	0	0	2.92512	3.77546	7.50715	0
ENSMUSG00000006270	Vax1	1.94223	5.00167	0	0	0	2.68196	2.00307	8.85398	0
ENSMUSG00000006273	Atp6v1b2	4.63981	9.8448	0	0	0	108.321	101.006	17.016	0
ENSMUSG00000006288	Ttc5	4.32912	9.04658	1	0	0	66.2065	55.3114	14.8897	0
ENSMUSG00000006289	Osgep	4.19826	9.13058	0	0	0	61.7328	54.8084	14.6707	3
ENSMUSG00000006301	Tmbim1	3.99159	6.68081	0	0	0	16.9685	9.24514	11.3806	1
ENSMUSG00000006304	Arpc2	4.95949	11.337	1	0	0	185.177	221.462	20.9937	37
ENSMUSG00000006307	Wbp7	4.04273	8.73216	0	0	0	46.6788	39.1054	13.811	1
ENSMUSG00000006313	Upk1a	3.26948	4.78196	0	0	0	5.13463	4.75934	8.87494	17
ENSMUSG00000006356	Crip2	2.29514	9.68788	0	0	0	20.8673	24.8573	13.4515	1
ENSMUSG00000006360	Crip1	0.869477	10.3037	0	0	0	14.9481	12.0605	15.3145	1
ENSMUSG00000006362	Cbfa2t3h	6.11867	6.29607	0	0	0	46.6604	17.719	19.1422	0
ENSMUSG00000006369	Fbln1	6.32603	7.31232	0	0	1	78.8757	31.1892	22.7269	6
ENSMUSG00000006373	Pgrmc1	2.97435	10.1473	0	0	0	34.4208	48.9512	14.1963	1
ENSMUSG00000006378	Gcat	2.89433	8.5746	0	0	0	19.026	18.2907	12.267	1
ENSMUSG00000006389	Mpl	3.91361	2.44241	0	0	0	3.2826	4.26489	7.66392	0
ENSMUSG00000006392	Med8	2.52482	6.21684	0	0	0	5.2001	3.30602	9.81816	0
ENSMUSG00000006398	Cdc20	2.15023	11.7696	1	0	0	30.8046	54.7241	16.2789	1
ENSMUSG00000006411	Pvrl4	4.18595	3.16076	0	0	0	5.75029	6.46513	8.51723	1
ENSMUSG00000006412	Pfdn2	3.64051	10.6201	0	0	0	61.3977	89.7825	15.5782	24
ENSMUSG00000006418	Zfp313	3.67084	8.73406	0	1	0	34.7619	32.2257	13.1706	0
ENSMUSG00000006435	Neurl	6.32986	6.03608	0	0	0	45.6376	17.507	20.2719	10
ENSMUSG00000006456	Rbm14	3.46519	5.33157	4	0	0	6.9614	5.30669	9.47641	4
ENSMUSG00000006463	Zdhhc24	2.73682	5.83681	0	0	0	5.10292	3.53144	9.5202	0
ENSMUSG00000006471	Ndor1	3.40054	5.82711	0	0	0	7.76956	5.27929	9.85713	0
ENSMUSG00000006494	Pdk1	4.84689	9.97635	0	0	0	128.224	117.77	18.0487	9
ENSMUSG00000006498	Ptbp1	3.29337	6.75777	1	2	0	10.3031	6.5471	10.6361	0
ENSMUSG00000006517	Mvd	3.29602	6.23927	1	0	0	8.34467	5.3754	10.1493	0
ENSMUSG00000006522	Itih3	3.9042	3.55569	0	0	0	5.43998	6.23543	8.46801	0
ENSMUSG00000006527	Sfmbt1	6.62267	4.96193	0	0	0	35.8639	17.4837	20.7089	0
ENSMUSG00000006529	Itih1	3.79088	6.07506	0	0	0	11.3871	6.82015	10.491	0
ENSMUSG00000006538	Ihh	2.6638	2.3844	0	0	0	1.35007	2.00054	6.94802	0
ENSMUSG00000006546	Cryba2	1.67446	2.23626	0	0	0	0.800499	0.946572	6.96316	0
ENSMUSG00000006567	Atp7b	6.03848	4.573	0	0	0	26.0987	15.4141	15.893	0
ENSMUSG00000006574	Slc4a1	4.02636	4.02758	0	0	0	7.17118	7.10751	8.99019	0
ENSMUSG00000006575	Rap2ip	3.15056	5.53728	0	0	0	5.96094	4.4466	9.43046	1
ENSMUSG00000006576	Slc4a3	3.66369	3.01571	0	0	0	3.55543	4.70624	7.83247	1
ENSMUSG00000006586	Cbfa2t1h	7.21072	5.89621	0	0	0	57.9584	20.1099	29.2329	2
ENSMUSG00000006638	Abhd1	2.32769	4.94473	0	0	0	3.12812	2.61505	8.74468	1
ENSMUSG00000006641	Slc5a6	3.68807	2.50534	0	0	0	2.83332	3.8922	7.49803	0
ENSMUSG00000006646	Mpv17	3.72868	6.89485	0	0	0	15.1521	8.9931	11.2185	5
ENSMUSG00000006651	Aplp1	2.97984	5.4135	0	0	0	5.14579	3.98793	9.24101	3
ENSMUSG00000006678	Pola1	8.35486	8.64576	4	0	0	279.587	110.528	66.6704	10
ENSMUSG00000006699	Cdc42	5.24709	6.80899	0	1	0	41.1936	16.8739	15.0379	44
ENSMUSG00000006705	Pknox1	4.5846	7.20113	1	0	0	33.9659	16.4468	13.2312	64
ENSMUSG00000006717	Them2	3.75862	8.15742	0	0	0	28.7492	22.2031	12.6244	3
ENSMUSG00000006720	Zfp184	3.95364	4.54942	0	0	0	8.03314	6.95969	9.32942	0
ENSMUSG00000006724	Cyp27b1	2.25005	2.12825	0	0	0	0.960175	1.34538	6.77673	0
ENSMUSG00000006728	Cdk4	1.91877	10.2553	0	1	0	20.7699	25.5985	14.2732	53
ENSMUSG00000006731	Galgt1	2.83956	3.24374	0	0	0	2.24677	3.11713	7.5471	0
ENSMUSG00000006732	Mettl1	1.81967	7.36639	0	0	0	6.29857	3.62277	11.0212	8
ENSMUSG00000006736	Tspan31	1.57773	9.49074	0	0	0	14.6071	13.4344	13.5162	3
ENSMUSG00000006740	Kif5b	5.25826	10.2063	4	0	0	169.091	153.805	20.5335	5
ENSMUSG00000006764	Tph2	6.72528	2.80622	0	0	0	16.5119	13.0893	17.7841	0
ENSMUSG00000006800	Sulf2	6.35221	9.83051	1	5	1	230.494	173.343	28.8577	61
ENSMUSG00000006818	Sod2	2.93112	9.9688	0	0	0	31.9229	43.594	13.942	4
ENSMUSG00000006958	Chrd	3.20977	3.55202	0	0	0	3.2299	4.23156	7.90525	0
ENSMUSG00000006998	Psmd2	3.55176	10.9521	1	0	0	61.5359	98.1423	15.91	0
ENSMUSG00000007021	Syngr3	2.41873	6.12957	0	0	0	4.77223	3.0177	9.73542	0
ENSMUSG00000007029	Vars2	3.92543	9.21434	0	1	0	51.2212	50.3678	14.1916	4
ENSMUSG00000007034	Slc44a4	3.98914	3.83684	0	0	0	6.49707	6.8376	8.78877	3
ENSMUSG00000007035	Msh5	4.17967	1.63676	0	0	1	2.66251	3.26204	7.40956	5
ENSMUSG00000007038	Neu1	2.21412	5.39804	0	0	0	3.40082	2.42122	9.12174	0
ENSMUSG00000007039	Ddah2	1.58832	8.63084	0	0	0	10.5953	7.83455	12.4945	2
ENSMUSG00000007041	Clic1	3.08491	9.85327	0	0	0	33.984	45.1284	13.8991	9
ENSMUSG00000007044	Ly6g6c	1.44573	2.39697	0	0	0	0.802702	0.863853	7.15442	1
ENSMUSG00000007097	Atp1a2	4.9819	2.96715	0	0	0	9.05525	8.55128	9.8785	1
ENSMUSG00000007107	Atp1a4	5.09748	3.95176	0	0	0	14.4829	11.2625	11.1332	0
ENSMUSG00000007122	Casq1	3.31223	5.42232	0	0	0	6.4163	4.8699	9.43541	2
ENSMUSG00000007207	Stx1a	4.78346	4.13029	0	0	0	12.9405	10.113	10.4607	3
ENSMUSG00000007415	Gatad1	2.99077	8.16751	0	0	0	16.7475	14.3713	11.8707	1
ENSMUSG00000007440	Pcdha1	7.56817	4.83498	0	0	0	46.5141	20.2902	31.4887	0
ENSMUSG00000007476	Lrrc8	5.47336	2.37421	0	0	0	8.54418	7.94661	10.7545	1
ENSMUSG00000007480	Mc5r	1.0895	2.30371	0	0	0	0.686554	0.633833	7.27404	0
ENSMUSG00000007594	Hapln4	2.65214	6.20002	0	0	0	5.52968	3.57703	9.82067	0
ENSMUSG00000007610	Gtpbp3	2.40572	6.34194	0	0	0	5.13373	3.16529	9.92477	0
ENSMUSG00000007613	Tgfbr1	5.94533	8.64156	2	0	0	130.558	75.8891	22.2296	1
ENSMUSG00000007617	Homer1	6.63438	6.24387	0	0	0	54.5136	19.5719	23.3782	1
ENSMUSG00000007646	Rad51c	4.81363	4.68955	0	0	0	15.7705	10.3148	11.0831	10
ENSMUSG00000007653	Gabrb2	7.70924	4.44497	0	0	1	43.0224	20.6918	32.5888	0
ENSMUSG00000007670	Khsrp	3.3864	8.41284	1	0	0	24.4369	21.8659	12.4494	0
ENSMUSG00000007687	Psme2	1.64339	9.93644	0	0	0	17.1493	17.9545	14.0263	4
ENSMUSG00000007739	Cct4	3.67175	13.159	0	0	1	89.7241	206.857	19.6807	2
ENSMUSG00000007777	Trappc2	1.70044	8.57079	0	0	2	10.75	8.1444	12.3573	18
ENSMUSG00000007783	Cpt1c	4.02139	8.15838	5	0	0	35.4715	25.4726	13.0694	2
ENSMUSG00000007815	Rhoa	4.98331	11.2895	5	11	0	186.076	219.657	21.0301	67
ENSMUSG00000007817	Rai17	7.68258	7.98986	1	0	0	170.041	64.1552	44.3619	7
ENSMUSG00000007833	Aldh16a1	3.66664	7.20682	0	0	0	16.7413	10.5163	11.4608	3
ENSMUSG00000007850	Hnrph1	3.1334	12.0435	3	0	0	54.6001	112.644	17.0022	1
ENSMUSG00000007872	Id3	0.648005	9.0258	0	0	1	9.48551	5.02104	13.9231	1
ENSMUSG00000007880	Arid1a	5.41647	11.1674	3	0	2	223.958	244.636	23.4736	41
ENSMUSG00000007908	Hmgcll1	6.92332	2.42322	0	0	0	14.5778	11.5251	18.7217	0
ENSMUSG00000007946	Phox2a	2.0844	4.23612	0	0	0	2.2443	2.21797	8.22804	0
ENSMUSG00000007950	Abhd8	2.7966	4.26696	0	0	0	3.24334	3.56408	8.26999	0
ENSMUSG00000007987	Rabl5	2.34908	6.42944	0	0	0	5.16844	3.13655	10.0049	0
ENSMUSG00000007989	Fzd3	5.90898	5.20392	0	0	0	30.1672	14.778	16.0636	0
ENSMUSG00000008035	Mid1ip1	1.14339	9.17243	0	0	0	11.3891	8.05159	13.5101	0
ENSMUSG00000008036	Ap2s1	4.51992	9.40158	0	0	0	86.6133	74.9475	15.9435	6
ENSMUSG00000008153	Clstn3	5.07429	4.03026	0	0	0	14.7175	11.2448	11.1437	6
ENSMUSG00000008200	Fnbp4	5.15591	9.07803	1	0	0	112.804	79.3759	18.011	1
ENSMUSG00000008226	Scrn3	4.65151	7.56832	0	0	0	42.6181	21.8659	13.875	15
ENSMUSG00000008305	Tle1	6.38805	5.60694	1	0	0	40.3587	16.8167	19.9515	6
ENSMUSG00000008318	Tnfrsf19l	4.13323	6.87342	0	0	0	20.7101	10.9465	11.8292	1
ENSMUSG00000008333	Snrpb2	1.72028	2.67237	0	0	0	1.01386	1.19026	7.22875	4
ENSMUSG00000008384	Sertad1	1.76553	8.32624	0	0	0	9.86862	7.1385	12.051	12
ENSMUSG00000008393	Carhsp1	3.76203	7.29312	1	0	0	18.8191	11.7294	11.6768	11
ENSMUSG00000008398	Elk3	5.96781	6.07879	0	0	0	40.8393	16.1603	17.7593	5
ENSMUSG00000008435	Rdh13	4.38149	6.21013	0	0	0	19.0503	9.43105	11.6206	0
ENSMUSG00000008450	Nutf2	4.30531	11.3716	6	0	1	120.254	169.568	18.3098	81
ENSMUSG00000008475	Arpc5	3.14633	10.7459	0	0	0	44.3132	71.3085	15.1252	0
ENSMUSG00000008489	Elavl2	6.92235	8.34042	0	1	0	158.9	75.367	32.0157	70
ENSMUSG00000008540	Mgst1	4.01935	2.31903	0	0	0	3.3556	4.25282	7.69114	0
ENSMUSG00000008575	Nfib	7.71113	5.21435	0	0	3	54.4081	20.5261	34.9784	16
ENSMUSG00000008601	Rab25	2.64409	6.8512	0	0	0	7.20803	4.60392	10.4169	3
ENSMUSG00000008604	Ubqln4	4.00108	9.28691	5	0	0	55.8439	54.7147	14.4365	3
ENSMUSG00000008658	A2bp1	8.41483	2.86396	0	0	0	28.2685	16.361	40.7448	0
ENSMUSG00000008668	Rps18	1.86552	5.44141	0	0	0	2.9705	1.90174	9.2386	1
ENSMUSG00000008682	Rpl10	1.18713	13.6885	1	0	0	25.9978	45.2381	20.2866	3
ENSMUSG00000008683	Rps15a	3.5623	6.65236	0	0	0	11.9527	7.25845	10.7811	20
ENSMUSG00000008730	Hipk1	5.25327	8.14192	0	0	0	79.03	42.529	17.0014	2
ENSMUSG00000008734	Gprc5b	4.53076	6.1634	0	0	0	20.8874	9.97201	11.91	1
ENSMUSG00000008763	Man1a2	6.89252	7.5233	0	0	0	105.657	40.5	29.3385	3
ENSMUSG00000008855	Hdac5	5.10333	5.80493	0	0	0	26.0718	11.8015	13.1928	0
ENSMUSG00000008859	Rala	4.04701	9.16681	0	0	0	55.4902	52.0351	14.3757	20
ENSMUSG00000008932	Slc1a7	5.49819	3.64933	0	0	0	15.4899	12.3705	12.1673	0
ENSMUSG00000008958	Vps72	3.56523	6.87927	0	0	0	13.2574	8.15242	11.0086	12
ENSMUSG00000008976	Gabpa	4.84403	9.30064	2	0	0	103.43	80.9058	16.9636	40
ENSMUSG00000008999	Bmp7	6.14176	3.99276	0	0	1	22.3491	15.5246	15.6665	3
ENSMUSG00000009013	Dnclc1	1.92941	12.0224	0	0	0	29.0068	50.8076	16.7499	34
ENSMUSG00000009073	Nf2	6.37643	7.39575	0	0	0	83.6157	33.4187	23.3598	37
ENSMUSG00000009075	Cabp7	2.99241	3.51038	0	0	0	2.75996	3.67633	7.77978	1
ENSMUSG00000009076	Zmat5	5.04391	5.01413	0	0	1	19.7934	11.218	12.0872	53
ENSMUSG00000009090	Ap1b1	6.57306	8.70106	0	0	0	166.192	91.5589	28.4809	3
ENSMUSG00000009092	Derl3	1.3471	4.83232	0	0	0	2.05612	1.30557	8.98015	0
ENSMUSG00000009108	Gnat2	3.06385	5.73744	0	0	0	6.00752	4.28301	9.55621	3
ENSMUSG00000009145	Dqx1	3.20555	2.39059	0	0	0	1.88182	2.80812	7.1125	0
ENSMUSG00000009207	Lnp	5.87083	7.35937	0	0	0	68.817	28.7545	19.2738	0
ENSMUSG00000009246	Trpm5	4.52344	6.38457	0	0	0	22.5957	10.5785	12.1335	0
ENSMUSG00000009292	Trpm2	5.93864	2.10261	0	0	0	8.86179	7.99539	12.2514	0
ENSMUSG00000009293	Ube2g2	4.56499	7.68833	4	0	0	42.6449	23.0226	13.7733	0
ENSMUSG00000009350	Mpo	3.43523	3.1803	0	0	0	3.22543	4.37375	7.77527	0
ENSMUSG00000009376	Met	6.3324	5.84856	0	0	0	42.836	17.0031	19.9498	0
ENSMUSG00000009378	Slc16a12	6.29846	3.32366	0	0	0	18.127	14.2542	15.6551	0
ENSMUSG00000009406	Elk1	3.93546	2.90058	0	0	0	4.17883	5.21509	8.01289	0
ENSMUSG00000009418	Nav1	7.39615	6.90662	1	0	0	91.7608	29.1951	34.9666	4
ENSMUSG00000009470	Tnpo1	5.5834	9.09007	2	1	0	136.529	92.2005	20.4796	19
ENSMUSG00000009471	Myod1	1.38902	2.59289	0	0	0	0.869249	0.903737	7.30866	0
ENSMUSG00000009487	Otog	6.13849	6.26471	0	0	0	46.4285	17.6481	19.2299	0
ENSMUSG00000009545	Kcnq1	8.32101	5.33049	0	0	0	67.2385	21.6456	48.4622	3
ENSMUSG00000009555	Cdk9	2.40381	10.2229	0	0	0	25.6037	35.1776	14.1148	1
ENSMUSG00000009566	Fpgs	3.52895	8.54538	0	0	0	28.7762	26.1062	12.7604	1
ENSMUSG00000009575	Cbx5	5.47275	7.69323	0	45	0	69.7649	Hotspot	17.4236	429
ENSMUSG00000009614	Sardh	5.86829	4.39725	0	0	0	23.2387	14.7305	14.7177	0
ENSMUSG00000009621	Vav2	7.36462	6.24026	2	0	0	68.6877	22.0255	32.4236	2
ENSMUSG00000009630	Ppp2cb	4.33478	3.23537	0	2	0	6.67113	7.09978	8.79626	8
ENSMUSG00000009646	Pla2g12b	4.19424	2.11465	0	0	0	3.46928	4.20172	7.75636	0
ENSMUSG00000009654	Oit3	4.23419	2.94436	0	0	0	5.40801	6.14781	8.41856	0
ENSMUSG00000009681	Bcr	6.92036	7.00479	3	0	0	82.7684	28.7829	28.3362	0
ENSMUSG00000009731	Kcnd1	3.8518	3.55278	0	0	0	5.21077	6.06357	8.40822	0
ENSMUSG00000009733	Tcfcp2	5.62015	4.78532	0	0	0	23.8957	13.6771	14.0221	1
ENSMUSG00000009734	Pou6f2	8.54506	3.4357	0	0	0	37.885	19.7522	46.0569	3
ENSMUSG00000009739	Pou6f1	4.2252	2.41667	0	0	0	4.15122	4.92405	8.01284	0
ENSMUSG00000009772	Nuak2	4.11869	6.30781	0	0	0	16.1195	8.5471	11.2118	1
ENSMUSG00000009828	Ick	5.87877	5.4807	0	0	1	32.4716	14.7355	16.298	19
ENSMUSG00000009863	Sdhb	4.1639	10.4331	0	0	0	89.0576	108.382	16.4196	14
ENSMUSG00000009900	Wnt3a	5.41684	6.08125	0	0	0	33.1173	13.746	14.7971	0
ENSMUSG00000009905	Fvt1	5.1631	7.14731	5	0	0	46.3901	19.9657	15.1462	1
ENSMUSG00000009907	Vps4b	4.75542	3.38373	0	0	0	9.55748	8.90038	9.71262	0
ENSMUSG00000009995	Taz	2.88577	7.11661	0	0	0	9.36884	6.27574	10.7432	0
ENSMUSG00000010025	Aldh3a2	5.45058	7.66115	0	0	0	68.0301	31.5404	17.2548	4
ENSMUSG00000010045	C78915	2.23634	8.00531	0	0	0	10.3189	7.77878	11.5534	0
ENSMUSG00000010047	Hyal2	1.86631	7.34269	0	0	0	6.34023	3.68392	10.9781	5
ENSMUSG00000010054	Tusc2	1.51299	6.34431	0	0	0	3.5515	1.69285	10.1956	2
ENSMUSG00000010057	Tusc4	1.79494	6.18174	0	0	0	3.69877	1.9847	9.90766	1
ENSMUSG00000010064	Slc38a3	4.15462	5.22102	0	0	0	11.5563	7.63353	10.2165	0
ENSMUSG00000010066	Cacna2d2	7.01804	7.23965	0	0	0	95.5979	33.9321	30.2368	1
ENSMUSG00000010080	Epn3	3.15914	2.19572	0	0	0	1.65126	2.49107	6.96731	0
ENSMUSG00000010086	Zfp179	2.4351	5.21712	0	0	0	3.5782	2.80337	8.96203	0
ENSMUSG00000010097	Nxf1	3.78743	7.7607	1	0	0	24.2214	16.6678	12.22	0
ENSMUSG00000010110	Stx5a	3.82782	4.54234	0	0	0	7.24869	6.51916	9.17041	3
ENSMUSG00000010175	Prox1	5.34728	3.76925	0	0	0	15.2254	12.018	11.7493	0
ENSMUSG00000010290	AI597479	4.10744	7.61573	0	0	0	29.0935	17.6274	12.6028	1
ENSMUSG00000010392	Gosr1	5.20766	6.22537	2	0	0	31.7844	13.2409	14.1042	1
ENSMUSG00000010406	Mrpl52	1.55533	9.87698	0	1	0	16.3414	16.3295	14.0154	23
ENSMUSG00000010461	Eya4	7.94118	4.76318	0	0	0	50.8283	21.1117	37.7218	0
ENSMUSG00000010476	Ebf3	6.90351	2.65358	0	0	0	16.2466	12.7038	18.9505	0
ENSMUSG00000010492	Uckl1	3.68055	7.34653	0	0	0	18.1233	11.6433	11.6247	0
ENSMUSG00000010505	Myt1	6.00991	5.41925	0	0	0	33.3878	15.2254	16.9838	0
ENSMUSG00000010517	Faf1	8.16658	10.1061	16	0	0	438.17	258.915	68.8722	17
ENSMUSG00000010592	Dazl	3.82772	4.18979	0	0	0	6.46831	6.47981	8.88155	0
ENSMUSG00000010651	Acaa1	3.17808	2.38164	0	0	0	1.83931	2.75117	7.0942	0
ENSMUSG00000010660	Plcd1	4.45766	5.93619	0	0	0	18.2866	9.2337	11.4996	3
ENSMUSG00000010721	Lmbr1	7.19167	5.17172	0	0	0	45.8566	19.2292	27.1319	3
ENSMUSG00000010755	Cars	5.42052	8.66437	1	0	0	107.836	66.0253	18.7269	2
ENSMUSG00000010796	Asz1	5.86022	2.82841	0	0	0	12.4003	10.8206	12.7288	0
ENSMUSG00000010797	Wnt2	5.37215	3.26315	0	0	0	12.5036	10.8214	11.3051	0
ENSMUSG00000010803	Gabra1	5.68513	3.45166	0	0	0	15.3804	12.5534	12.6912	0
ENSMUSG00000010830	Kdelr3	3.40163	5.95038	0	0	0	8.10602	5.37571	9.96892	1
ENSMUSG00000010911	Apip	4.2439	6.70023	1	0	0	20.9004	10.5661	11.8569	0
ENSMUSG00000010914	Pdhx	5.71246	7.6608	0	0	0	75.4219	34.1739	18.7645	0
ENSMUSG00000010936	Vac14	6.66976	8.2801	2	0	0	142.334	68.8247	28.5448	1
ENSMUSG00000011034	Slc5a1	5.86948	3.51445	0	0	0	16.8982	13.4256	13.5903	2
ENSMUSG00000011114	Tbrg1	3.0291	11.0469	0	0	0	43.6837	75.0186	15.4441	0
ENSMUSG00000011148	Adssl1	4.41041	3.06135	0	0	0	6.53107	6.95565	8.77954	1
ENSMUSG00000011158	Brf1	5.33317	6.83353	0	0	0	43.3084	17.6048	15.4516	2
ENSMUSG00000011171	Vipr2	6.07859	3.13971	0	0	0	15.4861	12.7986	14.1621	0
ENSMUSG00000011256	Adam19	6.51242	9.19782	0	2	0	197.68	125.04	29.0598	6
ENSMUSG00000011306	Sf4	4.90867	8.5559	1	0	0	80.1486	50.9243	16.1057	3
ENSMUSG00000011349	Dmrtc2	2.92372	6.12427	0	0	0	6.2864	4.17443	9.83275	0
ENSMUSG00000011589	Fsd1	3.19393	7.08716	0	0	0	11.2194	7.43686	10.8841	0
ENSMUSG00000011831	Evi5	7.02584	8.63661	1	1	0	187.351	95.0039	34.4443	75
ENSMUSG00000011877	Git1	3.84429	7.91499	0	0	0	27.353	19.3106	12.4799	2
ENSMUSG00000011958	Bnip2	4.23427	9.18507	0	0	0	64.777	57.6851	14.8319	2
ENSMUSG00000011960	Ccnt1	4.64599	7.28472	1	0	0	36.894	17.8534	13.5063	4
ENSMUSG00000012017	Scarf2	3.45956	4.67237	0	0	0	5.68213	5.32133	8.92167	0
ENSMUSG00000012076	Brms1l	5.05576	7.15534	1	0	0	44.1298	19.2983	14.7253	0
ENSMUSG00000012114	Pcqap	6.1635	8.10429	3	0	0	110.313	53.9696	22.9386	4
ENSMUSG00000012117	Dhdds	4.991	4.00455	1	0	0	13.9605	10.8765	10.8789	1
ENSMUSG00000012123	Aim1l	3.76203	3.33801	0	0	0	4.43471	5.48685	8.15543	3
ENSMUSG00000012126	Ubxd5	4.59634	2.02359	0	0	0	4.46228	4.82757	8.29108	60
ENSMUSG00000012282	Wnt8a	2.57555	6.50252	0	0	0	5.97013	3.7438	10.0817	0
ENSMUSG00000012296	Tjap1	4.65186	7.88492	0	0	0	49.895	27.7272	14.2805	9
ENSMUSG00000012350	Ehf	5.2912	2.8646	0	0	0	10.0552	9.20722	10.6472	1
ENSMUSG00000012405	Rpl15	1.01863	10.9793	0	0	0	18.0779	18.098	16.076	19
ENSMUSG00000012443	Kif11	5.50643	8.38963	2	4	0	99.018	55.7159	18.7556	7
ENSMUSG00000012520	Phox2b	2.24184	6.84904	0	0	0	5.88331	3.51973	10.4019	0
ENSMUSG00000012535	Tnpo3	6.10398	8.95059	0	0	0	156.632	97.412	24.2231	15
ENSMUSG00000012609	Ttll5	7.83524	3.08822	0	0	0	26.5694	16.9362	30.6983	2
ENSMUSG00000012848	Rps5	2.12697	14.3574	1	0	0	37.9478	102.575	20.5969	25
ENSMUSG00000013033	Lphn1	4.64374	8.32162	0	0	0	61.218	38.5043	14.8318	3
ENSMUSG00000013076	Amotl1	5.64726	2.11767	0	0	0	8.02263	7.41759	11.1049	0
ENSMUSG00000013089	Etv5	5.86401	11.4455	1	0	0	279.436	309.721	27.8594	118
ENSMUSG00000013160	Atp6v0d1	5.37751	9.07135	0	0	0	124.558	85.3214	19.1813	2
ENSMUSG00000013236	Ptprs	5.99955	9.06014	1	0	0	157.45	101.787	23.5448	4
ENSMUSG00000013275	Slc41a1	4.38198	6.36078	0	0	0	20.1812	9.84856	11.7816	1
ENSMUSG00000013415	Igf2bp1	5.43232	10.3789	1	14	1	190.673	Hotspot	21.9581	27
ENSMUSG00000013539	D16H22S680	5.42861	6.55305	0	0	0	39.9175	15.9118	15.4997	3
ENSMUSG00000013584	Aldh1a2	6.32972	3.52821	0	0	0	19.9698	15.1065	16.1448	0
ENSMUSG00000013593	Ndufs2	3.61506	10.8269	0	0	0	62.9566	96.6212	15.8309	8
ENSMUSG00000013629	Cad	4.56493	9.60962	2	0	0	95.7445	86.0972	16.3966	0
ENSMUSG00000013662	Atad1	5.31335	9.1286	1	1	0	123.71	86.5697	18.9192	3
ENSMUSG00000013663	Pten	5.98932	9.71067	0	0	0	195.952	148.889	24.8844	20
ENSMUSG00000013698	Pea15	3.31904	8.49196	0	0	0	24.1456	22.2799	12.4727	4
ENSMUSG00000013707	Tnfaip8l2	1.50589	3.07343	0	0	0	1.13592	1.1849	7.58022	1
ENSMUSG00000013736	Trnt1	3.73314	7.86883	0	0	0	24.4827	17.5733	12.2615	2
ENSMUSG00000013787	Ehmt2	4.04212	10.1764	0	0	0	75.7853	90.4549	15.7436	2
ENSMUSG00000013822	Elof1	2.06385	8.63653	0	0	0	12.7846	11.0348	12.2724	2
ENSMUSG00000013833	Thrap5	3.82619	6.89196	0	0	0	16.3461	9.45768	11.3475	0
ENSMUSG00000013846	St3gal1	3.47496	4.8401	0	0	0	6.0472	5.3532	9.07101	0
ENSMUSG00000013858	ORF61	3.20398	9.06048	0	0	0	28.1838	30.6315	13.0271	1
ENSMUSG00000013878	Rnf170	4.46584	4.68737	0	0	0	12.4822	8.89355	10.2838	0
ENSMUSG00000013936	Myl2	2.55483	3.79197	0	0	0	2.4025	2.9333	7.88128	3
ENSMUSG00000013973	Dedd	3.37351	6.48258	0	0	0	9.68869	6.07706	10.4381	17
ENSMUSG00000013997	Nit1	2.33027	7.63626	0	0	0	8.9851	6.27074	11.1639	1
ENSMUSG00000014030	Pax5	7.48329	2.84526	0	0	0	21.3599	14.9351	25.2227	1
ENSMUSG00000014158	Trpv4	5.17995	2.88962	0	0	0	9.66084	8.94066	10.3401	0
ENSMUSG00000014195	Dnajc7	5.22257	10.6508	2	5	0	185.107	185.99	21.1631	66
ENSMUSG00000014226	Cacybp	3.37532	12.5853	0	4	0	68.4094	151.596	18.1635	49
ENSMUSG00000014232	Cluap1	5.00625	7.4423	0	0	0	49.4998	23.0183	14.9201	1
ENSMUSG00000014303	Glis2	4.40878	8.14888	0	0	0	47.7527	30.4681	13.9266	38
ENSMUSG00000014329	Bicc1	7.87372	6.5637	0	0	0	90.953	26.0253	42.9117	0
ENSMUSG00000014349	D11Moh35	4.16446	9.87798	0	0	0	76.8938	82.6982	15.6143	0
ENSMUSG00000014355	Anapc1	6.2718	9.48829	1	0	0	201.452	140.963	27.1088	10
ENSMUSG00000014361	Mertk	6.69991	3.95688	0	0	0	26.6506	17.4628	19.5294	0
ENSMUSG00000014402	Tsg101	4.9323	10.1704	0	0	0	141.993	134.135	18.7565	4
ENSMUSG00000014418	Hps5	5.15121	4.14426	0	0	0	15.909	11.6518	11.4956	21
ENSMUSG00000014453	Blk	5.47089	2.19793	0	0	0	7.79756	7.30435	10.5758	0
ENSMUSG00000014503	Pkd2l2	5.11487	2.40971	0	0	0	7.39587	7.14598	9.72474	2
ENSMUSG00000014504	Srp19	2.43723	9.84241	0	0	0	23.4321	29.7089	13.6363	1
ENSMUSG00000014550	Zfyve20	4.83086	6.69382	0	0	0	31.4477	13.6355	13.3481	1
ENSMUSG00000014551	Mrps25	3.8532	8.71865	0	0	0	39.8873	35.1528	13.4392	2
ENSMUSG00000014592	Camta1	6.70704	5.58874	0	0	0	44.6329	17.9271	22.7153	8
ENSMUSG00000014602	Kif1a	6.385	6.93186	0	0	0	67.0357	24.8598	22.4732	1
ENSMUSG00000014603	Alx3	3.42479	7.29579	0	0	0	14.576	9.74982	11.2855	0
ENSMUSG00000014606	Slc25a11	1.4844	8.04393	0	0	0	7.80475	4.70046	11.9157	1
ENSMUSG00000014609	Chrne	2.10836	2.23469	0	0	0	0.95176	1.28562	6.85794	0
ENSMUSG00000014668	Chfr	5.17433	9.18043	0	0	0	118.206	85.1831	18.2717	0
ENSMUSG00000014704	Hoxa2	1.21475	3.55383	0	0	0	1.27459	1.09073	8.07057	0
ENSMUSG00000014748	Tex261	2.41792	8.33934	0	0	0	13.1981	11.3247	11.8972	3
ENSMUSG00000014767	Tbp	4.13258	2.67383	1	0	0	4.38618	5.26634	8.07978	1
ENSMUSG00000014771	Pdcd2	2.51526	9.69071	0	0	0	23.2881	28.8387	13.4556	2
ENSMUSG00000014773	Dll1	3.04159	5.12496	0	0	0	4.89997	4.13066	9.0291	0
ENSMUSG00000014776	Nol3	2.45759	4.77918	0	0	0	3.17229	2.86078	8.61347	0
ENSMUSG00000014778	Fhod1	4.23189	4.708	0	0	0	10.5212	7.9758	9.87591	0
ENSMUSG00000014791	Elmo3	2.36737	5.7525	0	0	0	4.08888	2.74541	9.40827	0
ENSMUSG00000014813	Stc1	3.41549	3.64025	0	0	0	3.86148	4.85718	8.09299	0
ENSMUSG00000014850	Msh3	7.15049	7.53312	1	0	0	115.238	42.5167	32.9828	2
ENSMUSG00000014856	Hspc171	1.41954	8.9323	0	0	0	11.3212	8.49237	12.9671	5
ENSMUSG00000014905	Dnajb9	2.06074	8.19345	0	0	0	10.4476	7.95577	11.7896	2
ENSMUSG00000014907	BC053440	2.82151	11.5019	0	0	0	41.7166	77.9445	15.9582	3
ENSMUSG00000014932	Yes1	6.29247	4.35802	3	0	0	26.6355	16.3808	17.1557	31
ENSMUSG00000014956	Ppp1cb	5.86495	11.5193	0	0	0	282.855	317.88	28.0558	6
ENSMUSG00000015016	BC021611	5.21276	6.18369	0	0	0	31.3733	13.1257	14.0711	0
ENSMUSG00000015023	Ddx19a	4.51084	8.19572	1	0	0	52.6151	33.0554	14.265	7
ENSMUSG00000015027	Galns	5.03905	4.66795	0	0	0	17.7821	11.2617	11.6985	1
ENSMUSG00000015092	Edf1	2.07073	9.38071	0	0	0	17.0576	17.9014	13.1276	10
ENSMUSG00000015093	Clic3	0.953824	2.35842	0	0	0	0.6803	0.586492	7.39227	1
ENSMUSG00000015095	Fbxw5	2.23051	5.49675	0	0	0	3.53258	2.45702	9.20187	2
ENSMUSG00000015112	Slc25a13	7.45862	7.63089	2	1	0	133.067	47.6504	38.4789	45
ENSMUSG00000015120	Ube2i	3.78461	10.3971	0	0	0	65.2436	87.8609	15.5177	7
ENSMUSG00000015133	Lrrk1	7.01791	5.83387	0	0	0	53.4191	19.3632	26.6138	0
ENSMUSG00000015134	Aldh1a3	5.19227	4.9914	0	0	0	21.1697	11.8436	12.5559	0
ENSMUSG00000015143	Actn1	6.53205	11.0157	3	0	0	326.401	309.773	34.5487	15
ENSMUSG00000015149	Sirt2	4.45871	2.61978	0	0	0	5.4853	6.0028	8.51273	4
ENSMUSG00000015165	Hnrpl	3.50297	11.0997	1	0	0	61.0359	101.173	16.0498	21
ENSMUSG00000015189	Cast1	5.40313	7.69488	0	0	0	67.8132	31.8485	17.0597	1
ENSMUSG00000015202	Cnksr3	6.55218	8.36958	0	0	0	142.688	71.8876	27.3994	0
ENSMUSG00000015214	Mtmr1	5.76652	4.19863	0	0	0	20.9812	14.2421	13.957	0
ENSMUSG00000015217	Hmgb3	2.22095	9.85036	0	0	0	21.1719	25.7859	13.6619	0
ENSMUSG00000015243	Abca1	7.0124	7.49691	0	0	0	108.353	40.5369	30.8725	0
ENSMUSG00000015247	Nipsnap3a	3.34142	9.10261	0	0	0	31.4632	34.1044	13.2061	2
ENSMUSG00000015290	Ubl4	1.47871	8.60041	0	0	0	10.0718	7.0776	12.5371	1
ENSMUSG00000015305	Sash1	7.3546	8.79205	1	0	0	221.517	110.952	40.6782	3
ENSMUSG00000015312	Gadd45b	1.0827	7.41006	0	0	0	5.03868	2.17127	11.568	5
ENSMUSG00000015337	Endog	1.34823	5.51866	0	0	0	2.53228	1.3101	9.55654	0
ENSMUSG00000015340	Cybb	5.05589	2.4915	0	0	0	7.47913	7.25543	9.64431	0
ENSMUSG00000015342	Xkh	5.25731	2.22472	0	0	0	7.20408	6.89133	9.94904	0
ENSMUSG00000015354	Pcolce2	5.68167	7.8631	0	0	0	82.4338	39.4433	18.9176	3
ENSMUSG00000015357	Clpx	5.18388	8.03915	0	0	0	72.7893	38.3765	16.5177	1
ENSMUSG00000015405	Ace2	5.57728	3.60661	0	0	0	15.7192	12.5756	12.4268	0
ENSMUSG00000015461	Crebl1	2.91667	6.52248	0	0	0	7.29935	4.69081	10.1916	0
ENSMUSG00000015468	Notch4	4.616	2.52787	0	0	0	5.85815	6.18257	8.71532	1
ENSMUSG00000015474	Ppt2	3.40844	8.88624	0	0	0	30.3635	30.8294	13.0197	0
ENSMUSG00000015478	Rnf5	1.35896	8.71793	0	0	0	10.1807	7.03171	12.7668	13
ENSMUSG00000015501	Hivep2	4.51538	6.64914	0	0	0	25.0578	11.691	12.4083	0
ENSMUSG00000015522	Arnt	5.97347	6.27308	3	0	0	43.9461	16.9629	18.112	12
ENSMUSG00000015536	Mocs2	3.42613	2.75913	0	0	0	2.63405	3.74346	7.47784	0
ENSMUSG00000015542	Nat9	2.16511	5.7825	0	0	0	3.75652	2.40069	9.45264	0
ENSMUSG00000015568	Lpl	4.74179	7.93724	0	0	0	54.2809	29.9633	14.6369	0
ENSMUSG00000015579	Nkx2-5	1.56169	5.84516	0	0	0	3.01934	1.57671	9.71754	0
ENSMUSG00000015605	Srf	3.22095	7.12281	0	0	0	11.6216	7.72823	10.9387	0
ENSMUSG00000015619	Gata3	4.3591	4.60952	0	0	0	11.2571	8.47897	10.0084	0
ENSMUSG00000015652	Steap1	3.69933	7.65075	0	0	0	21.3932	14.6413	11.9751	7
ENSMUSG00000015653	Steap2	4.56261	7.98053	0	0	0	49.1963	28.7008	14.1365	12
ENSMUSG00000015659	Serac1	5.15672	2.47799	0	0	0	7.81464	7.48228	9.89735	0
ENSMUSG00000015668	Pdzk11	2.48594	8.59911	0	0	0	15.3398	14.3114	12.184	3
ENSMUSG00000015671	Psma2	5.93038	11.9279	1	0	0	307.238	370.062	29.7946	12
ENSMUSG00000015688	Bub3	3.51866	7.52833	1	0	0	17.5245	12.1119	11.624	5
ENSMUSG00000015697	Setdb1	5.07181	3.88401	1	0	0	13.9478	11.0756	10.9895	15
ENSMUSG00000015709	Arnt2	7.35475	6.51344	0	0	1	76.2346	24.0483	33.0819	0
ENSMUSG00000015711	Prune	4.82797	8.32094	2	0	0	68.7869	41.5314	15.4614	88
ENSMUSG00000015733	Capza2	4.87956	10.5277	0	0	0	150.555	155.12	19.1248	0
ENSMUSG00000015747	Vps45	5.873	3.84433	0	0	0	19.2537	14.2497	14.0205	3
ENSMUSG00000015748	Prpf3	4.65145	8.01355	2	0	4	53.1315	30.5825	14.4468	9
ENSMUSG00000015749	Anp32e	4.14454	10.046	4	0	0	79.3825	89.2449	15.8039	8
ENSMUSG00000015750	Aph1a	1.91762	6.02681	0	0	0	3.67222	2.09455	9.72496	3
ENSMUSG00000015755	Map3k7ip2	5.65733	10.5526	0	0	0	217.432	205.161	23.954	1
ENSMUSG00000015757	Ppil4	4.90285	8.61884	0	0	0	82.0893	53.1263	16.1748	0
ENSMUSG00000015759	Cnih	3.66993	10.6644	0	0	0	63.4371	92.9987	15.6906	3
ENSMUSG00000015766	Eps8	7.41791	5.22735	0	1	0	50.005	19.8353	30.3385	7
ENSMUSG00000015804	Med28	2.40681	10.2766	0	0	0	25.9974	36.1609	14.1837	6
ENSMUSG00000015806	Qdpr	4.01167	9.77026	0	0	0	65.9511	72.4101	15.1067	0
ENSMUSG00000015839	Nfe2l2	4.86513	9.43469	1	0	0	109.653	88.3119	17.2585	36
ENSMUSG00000015843	Rxrg	5.36678	4.82792	0	0	0	21.8203	12.6101	13.0092	1
ENSMUSG00000015869	Prpsap1	4.28562	10.6157	0	0	0	102.187	124.613	17.0371	10
ENSMUSG00000015932	Dstn	4.79254	12.0611	0	0	0	186.922	263.475	21.5298	27
ENSMUSG00000015942	Gtf2ird2	5.09238	5.20191	0	0	0	21.4701	11.4052	12.4537	15
ENSMUSG00000015943	Bola1	-0.00144342	2.52724	0	0	1	0.602343	0.299142	8.28583	9
ENSMUSG00000015944	Gats	5.36201	5.61503	0	0	0	27.6702	12.6935	13.9526	1
ENSMUSG00000015950	Ncf1	3.20085	3.00485	0	0	0	2.52921	3.59992	7.51792	4
ENSMUSG00000015957	Wnt11	4.25301	5.33215	0	0	0	12.9105	8.01307	10.4888	0
ENSMUSG00000015961	Adss	5.05914	10.7361	1	0	0	174.006	181.828	20.3973	2
ENSMUSG00000015971	Actr8	3.89025	8.44641	0	0	0	36.5132	29.544	13.1744	1
ENSMUSG00000015981	Stk32c	6.30258	2.01256	0	0	0	9.60081	8.36343	13.9214	0
ENSMUSG00000015994	Fnta	4.07724	10.6411	0	0	0	87.2416	113.876	16.508	1
ENSMUSG00000016018	Skiv2l2	5.90889	10.0381	1	1	0	209.5	172.941	24.9086	1
ENSMUSG00000016028	Celsr1	7.08039	3.14016	0	0	0	21.6178	15.6696	21.44	0
ENSMUSG00000016087	Fli1	6.87209	3.3319	0	0	0	22.0123	16.03	19.8769	0
ENSMUSG00000016128	Stard13	7.25331	6.51105	0	0	0	73.8116	23.6942	31.5302	0
ENSMUSG00000016150	Odz1	9.80842	2.26158	0	0	2	30.4634	13.1065	85.2134	0
ENSMUSG00000016179	Camk1g	4.57803	2.53486	0	0	0	5.72694	6.10064	8.65175	0
ENSMUSG00000016181	AA408296	4.69204	8.53035	1	0	0	69.4615	45.8021	15.2753	1
ENSMUSG00000016239	Lonrf3	5.08432	3.36429	0	0	0	11.4139	10.0643	10.5182	0
ENSMUSG00000016253	Th1l	3.5477	8.31087	0	0	0	26.2511	22.2137	12.5143	0
ENSMUSG00000016308	Ube2a	3.3013	11.1269	0	0	0	53.0752	91.0549	15.8209	27
ENSMUSG00000016327	Atp1b4	4.35382	2.92216	0	0	0	5.86805	6.45174	8.57919	0
ENSMUSG00000016346	Kcnq2	5.89838	5.83527	0	0	0	36.6376	15.2427	16.9473	1
ENSMUSG00000016349	Eef1a2	3.2211	6.56573	0	0	0	9.02404	5.74411	10.3996	0
ENSMUSG00000016382	Pls3	6.47372	10.5	0	0	0	286.713	246.533	32.1935	7
ENSMUSG00000016487	Ppfibp1	7.15951	6.75362	0	0	0	79.5528	26.0437	30.8582	5
ENSMUSG00000016520	Lnx2	5.89305	6.11546	0	0	0	40.2878	15.9635	17.3511	5
ENSMUSG00000016526	Dyrk3	3.41792	8.92004	0	0	0	30.9827	31.6957	13.0702	8
ENSMUSG00000016528	Mapkapk2	5.45497	8.18234	0	0	0	88.006	46.9148	18.1149	2
ENSMUSG00000016541	Sca10	6.98829	12.103	1	0	0	448.822	489.419	46.3878	12
ENSMUSG00000016552	D15Bwg0759	3.96023	6.27491	0	0	0	14.027	7.81852	10.9208	0
ENSMUSG00000016554	Eif3s7	3.55729	11.7436	0	0	0	70.6799	131.053	17.1041	9
ENSMUSG00000016624	Phf21b	6.14458	2.40714	1	0	0	11.1457	9.74581	13.5812	2
ENSMUSG00000016637	Rabl4	3.87273	3.80739	0	0	0	5.85428	6.41398	8.62794	0
ENSMUSG00000016756	Cmah	7.17136	2.81263	1	0	0	19.1032	14.1385	21.6983	0
ENSMUSG00000016757	BC055368	4.32387	8.4555	0	0	0	51.6496	36.8471	14.0988	1
ENSMUSG00000016763	Scube1	6.90677	6.35764	0	0	0	62.2208	21.2688	26.5599	0
ENSMUSG00000016918	Sulf1	7.39874	9.10248	5	0	0	253.445	136.654	42.7299	18
ENSMUSG00000016921	Sfrs6	2.48104	11.7121	0	0	0	35.7774	67.1451	16.1608	0
ENSMUSG00000016934	Top1	6.2627	10.1161	7	11	0	242.299	196.472	28.5972	104
ENSMUSG00000016942	Tmprss6	4.85519	4.82978	0	0	0	16.8688	10.4634	11.3365	1
ENSMUSG00000016946	Kctd5	4.68661	8.91519	0	0	0	81.2482	59.5343	15.7993	2
ENSMUSG00000016995	Matn4	3.93253	2.12094	0	0	0	2.82599	3.69831	7.46259	0
ENSMUSG00000017007	Rbpsuhl	3.6153	2.37136	0	0	0	2.50301	3.52012	7.34975	0
ENSMUSG00000017009	Sdc4	4.24352	4.89974	0	0	0	11.2513	7.99378	10.069	2
ENSMUSG00000017132	Pscd1	6.39897	3.13721	0	0	0	17.2769	13.7882	16.0152	0
ENSMUSG00000017144	Rnd3	4.22288	9.64496	0	0	0	75.0195	75.0593	15.4345	2
ENSMUSG00000017167	Cntnap1	3.77936	4.76174	0	0	0	7.46162	6.33719	9.29941	0
ENSMUSG00000017172	Aoc3	3.14274	3.95466	0	0	0	3.60443	4.32886	8.16499	5
ENSMUSG00000017188	D11Ertd99e	-0.0306192	5.60528	0	0	0	1.87773	0.451495	10.9939	2
ENSMUSG00000017204	Gsdm1	3.73963	3.72696	0	0	0	5.10819	5.90484	8.42627	1
ENSMUSG00000017221	Psmd3	3.74685	9.97322	0	0	0	56.6559	70.1352	14.8653	5
ENSMUSG00000017291	Taok1	5.79158	8.84846	0	0	0	134.539	83.8077	21.4661	9
ENSMUSG00000017299	Dnttip1	4.49914	8.80719	2	0	1	68.3835	51.0886	15.0439	2
ENSMUSG00000017300	Tnnc2	1.36401	2.75771	0	0	0	0.934663	0.949889	7.43082	3
ENSMUSG00000017307	Acot8	3.62632	8.10076	0	0	0	25.2317	19.7924	12.3758	3
ENSMUSG00000017314	Mpp2	4.97723	6.76817	0	0	0	35.3254	14.9755	13.9308	0
ENSMUSG00000017376	Nlk	7.02467	9.552	2	0	0	263.75	169.28	37.408	42
ENSMUSG00000017386	Traf4	3.03861	8.72139	0	0	0	22.1271	22.157	12.5118	5
ENSMUSG00000017390	Aldoc	1.75489	2.68164	0	0	0	1.03177	1.22492	7.22372	1
ENSMUSG00000017400	Stac2	4.07373	2.90991	0	0	0	4.68801	5.61289	8.18031	1
ENSMUSG00000017404	Rpl19	1.82171	13.8946	0	0	0	32.6402	75.2769	19.9287	14
ENSMUSG00000017412	Cacnb4	6.96025	2.6001	0	0	0	16.1147	12.5389	19.3393	0
ENSMUSG00000017417	Plxdc1	5.98055	2.30344	0	0	1	9.97937	8.90935	12.6656	14
ENSMUSG00000017418	Arl8	4.89588	6.14691	0	0	0	26.2552	11.5656	12.9025	2
ENSMUSG00000017421	Zfp207	4.48897	7.97818	0	0	0	46.6299	27.7329	13.9256	13
ENSMUSG00000017428	Psmd11	5.44847	11.59	3	0	0	243.619	287.59	24.6303	12
ENSMUSG00000017453	Pipox	3.724	6.54259	0	0	0	12.9268	7.56531	10.8597	40
ENSMUSG00000017466	Timp2	5.76654	6.99388	0	0	0	55.5052	22.0488	17.987	5
ENSMUSG00000017485	Top2b	6.03576	9.53643	0	0	0	188.505	136.787	24.9109	0
ENSMUSG00000017491	Rarb	8.59714	3.25362	0	0	0	35.5428	18.8541	46.6114	0
ENSMUSG00000017548	Suz12	5.35819	9.00913	3	0	0	120.636	81.4735	18.9639	13
ENSMUSG00000017588	Krt1-c29	2.46963	6.39653	0	0	0	5.41522	3.36137	9.9757	0
ENSMUSG00000017615	Tnfaip1	3.73844	8.59468	0	0	0	34.5508	30.3346	13.1044	2
ENSMUSG00000017631	Abr	7.27278	3.07596	0	0	0	22.2994	15.7851	23.2974	11
ENSMUSG00000017639	Rab11fip4	6.73805	7.15272	0	0	0	83.7386	30.5384	26.5279	8
ENSMUSG00000017664	Slc35c2	3.49493	1.76172	0	0	0	1.66193	2.43106	6.87265	0
ENSMUSG00000017670	Elmo2	5.26487	4.64707	0	0	0	19.7337	12.217	12.4219	0
ENSMUSG00000017686	Rhot1	5.86797	5.62893	0	0	0	33.8866	14.8147	16.4564	63
ENSMUSG00000017688	Hnf4g	7.22182	3.02458	0	0	0	21.4384	15.3997	22.6433	0
ENSMUSG00000017692	Rhbdl4	5.77821	3.1705	0	0	0	14.0989	11.9246	12.7643	0
ENSMUSG00000017697	Ada	4.56035	7.35937	0	0	0	36.0913	18.1093	13.3555	0
ENSMUSG00000017724	Etv4	3.95708	6.41101	0	0	0	14.7501	8.1431	11.0517	5
ENSMUSG00000017734	D2Bwg0891e	2.31063	3.01322	0	0	0	1.53026	2.04818	7.33948	0
ENSMUSG00000017740	Slc12a5	4.97609	3.76667	0	0	0	12.691	10.5176	10.6062	0
ENSMUSG00000017754	Pltp	4.17943	6.57893	0	0	0	18.8603	9.69928	11.6025	8
ENSMUSG00000017756	Slc12a7	6.39542	7.15787	1	0	0	74.897	28.5875	23.0343	6
ENSMUSG00000017760	Ppgb	3.02112	8.17719	0	0	0	17.146	14.7497	11.8985	3
ENSMUSG00000017764	Zswim1	2.06419	8.18877	0	2	0	10.4399	7.94662	11.7836	4
ENSMUSG00000017765	Slc12a4	4.48954	7.70103	1	0	0	40.6726	22.4812	13.5813	0
ENSMUSG00000017774	Myo1c	4.5568	9.13338	0	0	0	80.8462	64.7614	15.6769	3
ENSMUSG00000017776	Crk	4.78701	10.4041	1	0	0	138.357	141.371	18.5002	15
ENSMUSG00000017778	Cox7c	0.965692	12.4532	0	0	1	22.1297	28.3242	18.4581	2
ENSMUSG00000017781	Pitpna	5.34593	8.74185	1	0	3	107.869	67.9552	18.4424	463
ENSMUSG00000017817	Jph2	5.91116	6.35358	0	0	0	44.3286	17.0884	17.8438	0
ENSMUSG00000017831	Rab5a	4.8301	10.7251	3	0	3	152.856	165.675	19.2406	6
ENSMUSG00000017837	Nkiras2	2.87125	7.45507	0	0	0	10.9643	7.81604	11.0723	8
ENSMUSG00000017843	Ppp2r5c	7.05936	8.10758	1	2	1	148.703	64.6437	33.331	214
ENSMUSG00000017858	BC037708	4.84117	6.96429	3	0	0	35.7749	15.8027	13.7134	34
ENSMUSG00000017861	Mybl2	4.90944	10.0287	4	4	0	134.909	123.955	18.4122	46
ENSMUSG00000017868	Sgk2	4.73471	5.06842	0	0	0	16.8372	9.92716	11.2639	1
ENSMUSG00000017897	Eya2	7.14249	2.56719	0	0	0	16.7956	12.7241	20.94	2
ENSMUSG00000017914	Ankrd5	5.54155	3.11616	0	0	0	12.5661	10.921	11.7515	0
ENSMUSG00000017929	B4galt5	5.58577	2.24181	0	0	0	8.35383	7.73398	11.0091	1
ENSMUSG00000017943	Gdap1l1	3.95187	5.16238	0	0	0	9.65909	6.89668	9.86066	1
ENSMUSG00000017950	Hnf4a	6.04597	3.72519	0	0	0	19.5737	14.659	14.7566	1
ENSMUSG00000017969	Ptgis	5.60668	8.52443	0	0	0	109.47	63.4142	19.6012	4
ENSMUSG00000017978	Cadps2	9.15755	2.63007	0	0	0	30.923	15.3574	60.3052	3
ENSMUSG00000017999	Ddx27	4.29286	9.39957	1	0	0	73.0958	67.4822	15.2762	6
ENSMUSG00000018008	Pscd4	4.63552	2.78499	0	0	0	6.73335	6.9414	8.95822	1
ENSMUSG00000018042	Cyb5r3	4.22597	2.77632	0	0	0	4.96146	5.74465	8.27974	4
ENSMUSG00000018076	Thrap2	7.66615	8.47042	4	0	0	212.157	91.9337	45.9627	11
ENSMUSG00000018143	Mafk	3.47353	6.89894	0	0	0	12.4919	7.82806	10.933	1
ENSMUSG00000018160	Pparbp	5.36247	8.16814	3	0	0	84.0397	45.0261	17.5928	10
ENSMUSG00000018166	Erbb3	4.33156	7.52063	0	0	0	33.0533	18.3116	12.9699	5
ENSMUSG00000018167	Stard3	4.50564	6.1604	1	0	0	20.4934	9.8548	11.847	4
ENSMUSG00000018168	Zfpn1a3	5.69349	4.30196	0	0	0	21.1263	13.9924	13.7473	1
ENSMUSG00000018169	Mfng	4.1357	3.00461	0	0	0	5.14721	5.98863	8.33008	1
ENSMUSG00000018171	Tmem49	6.64325	10.5655	1	0	0	308.017	262.687	34.7335	15
ENSMUSG00000018189	Uchl5	4.91581	11.0027	0	0	0	170.061	191.933	20.1454	93
ENSMUSG00000018199	Trove2	4.42001	7.44684	0	0	0	34.0556	18.0889	13.0947	5
ENSMUSG00000018209	Stk4	6.34646	8.88459	10	0	1	165.956	98.7801	26.4239	2
ENSMUSG00000018217	Pmp22	4.80926	8.68678	0	0	0	79.9759	53.6729	15.9129	0
ENSMUSG00000018263	Tbx5	5.63874	3.01634	0	0	0	12.4725	10.8786	12.015	0
ENSMUSG00000018286	Psmb6	1.17632	11.4689	1	0	0	20.6248	24.472	16.599	0
ENSMUSG00000018287	Spag7	2.46048	9.10154	0	0	0	18.5273	19.6795	12.7507	7
ENSMUSG00000018293	Pfn1	1.47871	12.8294	1	0	0	26.7574	45.9631	18.4021	7
ENSMUSG00000018322	Tomm34	4.13439	9.28923	0	0	0	62.1553	58.5601	14.7314	1
ENSMUSG00000018334	Ksr	7.03951	2.24259	0	0	0	13.7954	10.7959	19.3999	5
ENSMUSG00000018340	Anxa6	5.12842	8.55248	1	0	0	89.9227	55.18	17.0438	13
ENSMUSG00000018362	Kpna2	3.43683	12.7238	0	2	0	72.4553	162.879	18.4883	0
ENSMUSG00000018363	Smurf2	6.62258	8.17989	1	0	0	133.661	63.2234	27.731	1
ENSMUSG00000018377	Vezf1	4.02883	8.21823	1	0	0	36.7133	26.7557	13.1548	0
ENSMUSG00000018378	Cuedc1	4.99426	6.99412	0	0	0	39.5551	17.0697	14.2814	81
ENSMUSG00000018379	Sfrs1	1.97233	10.9684	0	0	0	24.9362	36.2548	15.2017	0
ENSMUSG00000018381	Abi3	3.59562	4.42206	0	0	0	5.81915	5.74937	8.83516	2
ENSMUSG00000018395	Kif3a	5.11124	7.05483	0	0	0	43.2569	18.4924	14.8089	2
ENSMUSG00000018398	8-Sep	4.60271	5.26485	0	0	0	16.3696	9.38436	11.1412	0
ENSMUSG00000018401	Mtmr4	4.58976	7.73802	0	0	1	44.4725	24.1552	13.9068	1
ENSMUSG00000018425	Dhx40	5.24352	8.40463	0	0	0	88.9611	51.6301	17.3633	0
ENSMUSG00000018442	Derl2	3.59443	7.66183	0	0	0	19.8347	13.9382	11.8535	6
ENSMUSG00000018446	C1qbp	2.38073	11.719	0	0	0	34.0625	62.9499	16.1676	3
ENSMUSG00000018459	Slc13a3	6.0854	4.43928	0	0	0	25.4425	15.6005	15.9749	0
ENSMUSG00000018470	Kcnab3	2.76214	3.70158	0	0	0	2.59891	3.30628	7.84851	0
ENSMUSG00000018474	Chd3	4.7406	6.36957	0	0	0	26.0074	11.5509	12.6925	1
ENSMUSG00000018476	Jmjd3	4.04579	7.79965	0	0	0	30.3547	19.6183	12.6961	0
ENSMUSG00000018481	Appbp2	5.57128	8.85642	0	0	0	124.127	78.9415	19.9723	8
ENSMUSG00000018486	Wnt9b	4.48922	3.14891	0	0	0	7.20036	7.41777	8.98481	0
ENSMUSG00000018500	Adora2b	4.12673	3.32478	0	0	0	5.89832	6.5932	8.56359	0
ENSMUSG00000018501	Ncor1	7.14075	9.24808	6	4	0	246.728	144.229	38.3647	182
ENSMUSG00000018507	Trpv2	4.69008	2.32384	0	0	1	5.55243	5.81517	8.69352	3
ENSMUSG00000018537	Pcgf2	3.39602	7.10875	0	0	0	13.0363	8.48445	11.0687	12
ENSMUSG00000018547	Pip5k2b	4.88499	6.99285	0	0	0	37.1983	16.3514	13.895	2
ENSMUSG00000018559	Dullard	3.23787	7.80938	0	0	0	16.5037	12.697	11.6553	2
ENSMUSG00000018567	Gabarap	1.84117	10.2159	0	0	0	19.9341	23.7777	14.2616	5
ENSMUSG00000018569	Cldn7	1.24975	9.85881	0	0	0	14.7221	12.9034	14.2657	2
ENSMUSG00000018572	Phf23	2.04963	9.49015	0	0	0	17.5372	18.7995	13.2654	5
ENSMUSG00000018574	Acadvl	2.38294	7.09883	0	0	0	7.07422	4.47993	10.6306	0
ENSMUSG00000018581	Dnahc11	8.53266	3.99257	0	0	0	46.8463	21.6665	48.1176	0
ENSMUSG00000018583	G3bp	4.96051	10.8872	3	1	0	170.395	186.472	20.1592	5
ENSMUSG00000018589	Glra2	7.6291	2.53599	0	0	0	19.1955	13.377	26.3366	0
ENSMUSG00000018593	Sparc	4.66482	11.1516	0	0	0	149.961	183.59	19.2622	94
ENSMUSG00000018595	Glra4	4.48839	2.23054	0	0	0	4.60495	5.09781	8.26502	0
ENSMUSG00000018604	Tbx3	3.7721	6.53309	0	0	0	13.3735	7.73348	10.9116	6
ENSMUSG00000018620	Mmp20	5.54659	2.2562	0	0	0	8.28634	7.69371	10.8867	0
ENSMUSG00000018630	Rpl23	2.28007	2.16521	2	0	0	0.992633	1.39821	6.79747	86
ENSMUSG00000018634	Crhr1	4.46486	2.37869	0	0	0	4.88359	5.40912	8.33844	0
ENSMUSG00000018651	Tada2l	5.5903	8.86899	0	0	0	125.69	80.0711	20.1173	36
ENSMUSG00000018654	Zfpn1a1	6.42843	4.15937	0	0	0	26.1254	16.7746	17.7802	0
ENSMUSG00000018659	Pnpo	2.62223	6.83538	0	0	0	7.0721	4.50074	10.398	0
ENSMUSG00000018661	Cog1	3.72094	5.97857	0	0	0	10.4171	6.45219	10.3143	0
ENSMUSG00000018666	Cbx1	4.28407	4.91646	0	12	0	11.669	Hotspot	10.1546	106
ENSMUSG00000018669	Cdk5rap3	3.12052	9.32259	0	0	1	29.3344	34.2453	13.2722	7
ENSMUSG00000018672	Copz2	3.50208	6.09954	0	0	1	9.19136	5.85211	10.1946	4
ENSMUSG00000018677	D11Ertd333	2.12565	5.26744	0	0	0	3.14072	2.27339	9.02748	12
ENSMUSG00000018678	Sp2	4.60449	7.09922	1	3	0	32.7807	15.5401	13.1641	54
ENSMUSG00000018698	Lhx1	2.63204	2.77809	0	0	0	1.61248	2.32129	7.19648	0
ENSMUSG00000018707	Dnchc1	6.03333	9.63142	2	0	0	194.17	144.182	25.1043	1
ENSMUSG00000018733	Pex12	2.11537	6.2117	0	0	0	4.26702	2.50465	9.83716	4
ENSMUSG00000018736	Ndel1	5.65612	8.54928	2	0	0	112.804	65.523	19.9643	6
ENSMUSG00000018740	Slc25a35	2.63645	2.51133	0	0	0	1.41795	2.08135	7.02491	1
ENSMUSG00000018761	Mpdu1	2.57022	8.92683	1	0	0	18.3407	18.909	12.5617	4
ENSMUSG00000018765	Fxr2h	4.34533	8.4998	1	0	0	53.549	38.4348	14.2102	1
ENSMUSG00000018770	Atp5g3	1.51349	13.1775	0	0	0	27.8526	51.348	18.9542	4
ENSMUSG00000018775	Eif4a1	2.42787	13.4797	0	1	0	41.6134	104.501	18.9687	5
ENSMUSG00000018776	Amac1	0.874994	2.12043	0	0	0	0.589556	0.492597	7.28413	0
ENSMUSG00000018796	Acsl1	5.99921	7.28947	0	0	0	69.6099	28.3646	20.0474	3
ENSMUSG00000018800	Abca5	6.09394	2.18873	0	0	0	9.79095	8.68178	13.0652	0
ENSMUSG00000018820	Zfyve27	4.58334	6.37304	0	0	0	23.4613	10.8188	12.2702	1
ENSMUSG00000018822	Sfrp5	2.05693	7.01946	0	0	0	5.86469	3.41553	10.5991	1
ENSMUSG00000018845	Cmya4	5.00401	3.49025	0	0	0	11.5416	10.0784	10.4176	3
ENSMUSG00000018846	Pank3	4.09085	4.6797	0	0	0	9.33211	7.44877	9.63046	1
ENSMUSG00000018848	Rars	4.7073	10.5885	0	0	0	137.409	148.573	18.4745	5
ENSMUSG00000018849	BC037006	5.90535	5.57741	0	0	0	33.7898	14.9153	16.5961	2
ENSMUSG00000018861	Fdxr	3.16108	4.86147	0	0	0	4.88994	4.4565	8.87518	0
ENSMUSG00000018862	Otop3	3.60265	2.34973	0	0	0	2.4517	3.46073	7.32577	0
ENSMUSG00000018865	Sult4a1	4.89035	6.53326	0	0	0	30.405	13.0141	13.3448	1
ENSMUSG00000018893	Mb	5.13685	4.52762	0	0	0	17.8936	11.6882	11.856	8
ENSMUSG00000018900	Slc22a5	4.76198	3.07825	0	0	0	8.3867	8.14681	9.46125	0
ENSMUSG00000018906	P4ha2	4.9373	6.01991	0	0	0	25.6867	11.4491	12.886	1
ENSMUSG00000018919	Tm4sf5	2.55974	2.43528	0	0	0	1.31007	1.91361	6.96871	2
ENSMUSG00000018931	Gtlf3b	3.52932	8.02998	0	0	0	22.6473	17.7679	12.1777	0
ENSMUSG00000018965	Ywhah	3.18349	10.9528	0	0	1	47.3912	79.3572	15.4473	9
ENSMUSG00000018973	Hoxb1	0.940355	2.23428	0	0	0	0.636103	0.547424	7.31789	0
ENSMUSG00000018974	Sart3	4.86809	8.25841	1	0	0	68.4092	40.2664	15.5222	1
ENSMUSG00000018983	E2f2	4.48033	2.93338	0	0	0	6.47995	6.86269	8.79542	5
ENSMUSG00000018995	AI875199	6.82307	6.11946	0	0	0	55.3936	19.6689	25.056	1
ENSMUSG00000019054	Ttc11	2.05207	9.99742	0	0	0	20.4904	24.7622	13.8895	15
ENSMUSG00000019055	Plod1	4.73574	3.93181	0	0	0	11.7154	9.76209	10.1624	1
ENSMUSG00000019066	Rab3d	3.40762	5.44505	0	0	0	6.91249	5.15008	9.52687	2
ENSMUSG00000019082	Slc25a22	3.014	6.88124	0	0	0	9.06784	5.90974	10.5746	3
ENSMUSG00000019102	Aldh3a1	3.27352	3.04882	0	0	0	2.71117	3.81553	7.58552	1
ENSMUSG00000019124	Scrn1	5.91829	7.08309	0	0	0	61.189	24.2755	19.1132	2
ENSMUSG00000019132	BC005537	3.57459	9.84113	0	0	0	47.7165	59.6136	14.4167	3
ENSMUSG00000019143	Harsl	3.21568	5.13092	0	0	0	5.49821	4.58698	9.12666	0
ENSMUSG00000019146	Cacng2	6.96848	3.79217	0	0	0	27.361	17.9563	21.628	9
ENSMUSG00000019173	Rab5c	4.53481	8.59763	0	0	0	64.2546	44.9103	14.8663	33
ENSMUSG00000019179	Mdh2	3.55533	1.94446	2	0	0	1.91601	2.76437	7.02781	5
ENSMUSG00000019188	H13	5.22354	9.25317	2	0	0	124.214	90.6259	18.6473	15
ENSMUSG00000019210	Atp6v1e1	4.82355	2.43544	1	0	0	6.38825	6.4673	9.05398	4
ENSMUSG00000019230	Lhx9	4.11045	2.76841	0	0	0	4.51235	5.41347	8.12136	0
ENSMUSG00000019232	Agxt2l1	4.19385	4.06253	0	0	0	8.29152	7.74086	9.25547	0
ENSMUSG00000019302	Atp6v0a1	5.76123	5.34141	0	0	0	29.804	14.2006	15.4543	15
ENSMUSG00000019303	Psmc3ip	1.69911	8.09244	0	0	0	8.61766	5.70276	11.8331	3
ENSMUSG00000019312	Grb7	3.09288	8.01851	0	0	0	16.6232	13.6532	11.7725	3
ENSMUSG00000019325	G6pc	3.34852	1.9122	0	0	0	1.6195	2.41731	6.8807	0
ENSMUSG00000019326	Psme3	2.86414	9.47448	0	0	0	26.3514	31.9719	13.2958	14
ENSMUSG00000019338	Zfp687	3.12697	7.77696	0	1	0	15.087	11.596	11.5396	2
ENSMUSG00000019372	Nrbp2	2.5634	3.08166	0	0	0	1.79225	2.4805	7.39003	0
ENSMUSG00000019373	Cops3	4.45753	11.2473	1	0	5	131.966	173.818	18.6205	2
ENSMUSG00000019428	Fkbp8	2.91112	9.34413	1	0	0	25.9283	30.508	13.1629	19
ENSMUSG00000019432	Ddx39	3.0268	11.9993	1	2	0	50.7136	104.172	16.8363	11
ENSMUSG00000019433	Gipc1	1.88557	8.3202	0	0	0	10.3119	7.74055	11.9881	14
ENSMUSG00000019461	Plscr3	2.50767	8.02609	0	0	0	11.9003	9.48048	11.5684	0
ENSMUSG00000019464	Ptger1	2.55778	1.94867	0	0	0	1.01752	1.51008	6.66752	0
ENSMUSG00000019467	D10Ertd610	2.88343	7.36813	0	0	0	10.5782	7.40787	10.9903	6
ENSMUSG00000019471	Cdc37	3.50665	10.7619	2	0	0	57.2094	88.5366	15.5706	3
ENSMUSG00000019478	Rab4a	4.87101	7.60484	1	0	0	49.7761	24.5764	14.6387	6
ENSMUSG00000019494	Cops6	1.52807	10.7871	1	0	0	20.3222	24.4907	15.2453	9
ENSMUSG00000019518	Ap4m1	2.73682	3.76698	0	0	0	2.62731	3.28788	7.8899	1
ENSMUSG00000019528	Gyg1	5.04348	6.87674	0	0	0	38.4413	16.2611	14.3114	0
ENSMUSG00000019539	Rcn3	3.2082	6.95605	0	0	0	10.6455	6.93201	10.7653	4
ENSMUSG00000019558	Slc6a8	3.22543	9.10353	0	0	0	29.0579	31.8799	13.0966	0
ENSMUSG00000019564	Arid3a	4.78477	6.84403	0	0	0	32.7076	14.4418	13.3858	1
ENSMUSG00000019577	Pdk4	3.69588	5.06605	0	0	0	7.65721	6.02945	9.46772	0
ENSMUSG00000019578	Ubxd1	2.99693	7.54808	0	0	0	12.3931	9.03684	11.2251	1
ENSMUSG00000019579	D17Wsu104e	2.88362	7.97439	0	0	0	14.2928	11.6046	11.612	0
ENSMUSG00000019590	Cyb561	3.39012	5.09563	0	0	0	6.13974	5.08066	9.2161	2
ENSMUSG00000019647	Sema6a	7.08067	5.25355	0	0	0	45.3933	18.9128	25.9759	0
ENSMUSG00000019659	Ccdc12	5.78364	4.52559	3	0	1	23.4665	14.3933	14.4613	35
ENSMUSG00000019699	Akt3	7.83722	6.17251	0	0	0	77.1967	22.8519	40.6542	2
ENSMUSG00000019715	Gle1l	4.55471	8.82361	0	0	0	71.6171	52.9386	15.2358	5
ENSMUSG00000019732	Calr3	4.27277	5.58115	0	0	0	14.1598	8.16479	10.7649	5
ENSMUSG00000019755	AI840826	6.13603	7.53691	0	0	0	82.5643	34.9525	21.5633	1
ENSMUSG00000019768	Esr1	8.17198	3.63108	0	0	1	36.9456	20.1335	38.3787	1
ENSMUSG00000019769	Syne1	7.68483	2.72241	0	0	0	21.3925	14.5623	27.5359	0
ENSMUSG00000019774	Mtrf1l	3.43976	5.07202	0	0	0	6.3186	5.22838	9.23509	0
ENSMUSG00000019775	Rgs17	6.4971	6.41978	0	0	0	55.7413	20.0885	22.4435	0
ENSMUSG00000019779	Frk	6.99064	3.2053	0	0	0	21.6323	15.7648	20.7106	0
ENSMUSG00000019782	Rwdd1	4.52776	10.6861	0	0	0	124.287	143.472	17.9429	1
ENSMUSG00000019789	Hey2	3.38198	4.20908	0	0	0	4.63535	5.07028	8.49802	0
ENSMUSG00000019790	Stxbp5	7.15912	6.02808	0	0	0	59.6807	20.3971	28.8867	0
ENSMUSG00000019794	Katna1	5.20727	8.86664	2	0	0	106.536	70.4806	17.9224	5
ENSMUSG00000019802	Sec63	6.15005	8.06797	0	0	0	107.888	52.3229	22.7475	1
ENSMUSG00000019803	Nr2e1	4.43716	2.84262	0	0	0	6.01491	6.50549	8.65072	0
ENSMUSG00000019804	Snx3	5.05957	10.5853	1	0	0	168.335	170.455	20.1224	16
ENSMUSG00000019808	Deadc1	3.31368	8.29235	0	0	1	21.9633	19.1669	12.2439	3
ENSMUSG00000019810	Fuca2	4.02219	5.46744	0	0	0	11.2128	7.18185	10.2389	0
ENSMUSG00000019820	Utrn	8.92975	9.75692	8	0	1	490.085	225.313	101.178	44
ENSMUSG00000019823	Mical1	3.41359	3.4246	0	0	0	3.53053	4.62691	7.93487	0
ENSMUSG00000019826	Zbtb24	3.92419	5.46478	0	0	0	10.3582	6.83081	10.0968	1
ENSMUSG00000019828	Grm1	8.63603	3.97307	0	0	1	47.8727	21.743	50.8302	0
ENSMUSG00000019831	Wasf1	5.78301	10.3484	0	0	0	217.075	194.015	24.5243	41
ENSMUSG00000019832	Rab32	3.71907	3.13145	0	0	0	3.91395	5.04183	7.96412	0
ENSMUSG00000019838	Slc16a10	6.72065	3.05232	0	0	0	18.5037	14.3111	18.1499	0
ENSMUSG00000019842	Traf3ip2	5.40514	5.83028	0	0	0	30.2286	13.1431	14.4128	6
ENSMUSG00000019843	Fyn	7.60386	6.68157	0	0	0	88.3069	26.6577	37.8913	5
ENSMUSG00000019845	Tube1	4.05996	3.00898	0	0	0	4.85612	5.77692	8.23715	1
ENSMUSG00000019846	Lama4	7.17677	4.7083	0	0	2	39.6971	19.312	25.8358	3
ENSMUSG00000019848	Popdc3	4.84955	3.8019	0	0	0	11.9722	10.0629	10.3129	0
ENSMUSG00000019849	Prep	6.51995	9.37078	1	0	0	210.634	138.995	29.6106	2
ENSMUSG00000019850	Tnfaip3	3.85718	5.93429	0	0	0	11.4294	6.88706	10.4439	0
ENSMUSG00000019851	Perp	3.58532	9.42501	0	0	0	42.183	47.6151	13.8974	0
ENSMUSG00000019852	D10Bwg1379	5.87679	3.00652	0	0	0	13.564	11.6077	13.0113	2
ENSMUSG00000019853	Hebp2	2.57386	3.27301	0	0	0	1.96293	2.65094	7.52045	0
ENSMUSG00000019854	Reps1	5.15737	9.08034	1	0	0	112.983	79.5336	18.022	1
ENSMUSG00000019857	Asf1a	3.60834	11.086	0	0	0	65.9256	106.733	16.1963	33
ENSMUSG00000019858	Mcmdc1	4.23626	4.87213	2	0	0	11.0952	7.96998	10.0315	4
ENSMUSG00000019861	Gopc	5.5063	5.11862	0	0	0	25.2479	13.1384	13.938	1
ENSMUSG00000019863	Qrsl1	4.78414	6.14949	0	0	0	24.5944	11.067	12.5663	0
ENSMUSG00000019864	Rtn4ip1	5.52532	4.44422	0	0	0	20.7132	13.3232	13.189	0
ENSMUSG00000019865	Nmbr	3.36008	3.22901	0	0	0	3.12309	4.25164	7.76115	0
ENSMUSG00000019872	Smpdl3a	4.1035	2.41123	0	0	0	3.76089	4.62903	7.85391	0
ENSMUSG00000019874	Fabp7	1.64847	3.62971	0	0	0	1.51535	1.52536	7.91182	0
ENSMUSG00000019877	Tde2	4.06376	10.3195	0	0	0	79.9911	97.8903	16.0008	2
ENSMUSG00000019878	Hsf2	4.73606	2.70782	1	3	0	6.92805	7.0198	9.09468	1
ENSMUSG00000019880	Rspo3	6.38146	5.53812	0	0	0	39.4051	16.7235	19.7754	0
ENSMUSG00000019883	Echdc1	5.09677	6.02239	0	0	0	27.9793	12.1631	13.4321	0
ENSMUSG00000019889	Ptprk	9.03213	7.51683	1	0	0	196.786	49.144	87.4834	11
ENSMUSG00000019890	Nts	3.11736	3.00083	0	0	0	2.38945	3.41945	7.47682	0
ENSMUSG00000019894	Slc6a15	5.67816	8.39689	0	0	0	106.271	59.0371	19.8335	0
ENSMUSG00000019899	Lama2	9.35034	3.1114	0	0	0	40.8744	18.4853	70.3876	0
ENSMUSG00000019906	Lin7a	7.2251	2.48311	0	0	0	16.5265	12.412	21.5905	0
ENSMUSG00000019907	Ppp1r12a	6.87756	10.3362	3	0	0	314.758	247.219	37.6219	6
ENSMUSG00000019913	Sim1	6.54693	5.10915	0	0	0	36.5518	17.1889	20.3378	0
ENSMUSG00000019916	P4ha1	5.61403	7.48791	0	0	1	66.6428	29.2398	17.884	3
ENSMUSG00000019920	Lims1	4.92182	4.89385	0	0	0	17.8692	10.7289	11.5895	16
ENSMUSG00000019927	Ube2d1	2.86869	8.5017	0	0	0	18.1483	17.0832	12.1744	2
ENSMUSG00000019929	Dcn	5.2607	4.66747	0	0	0	19.8197	12.1962	12.4301	0
ENSMUSG00000019932	Kera	2.70155	2.42909	0	0	0	1.41001	2.09211	6.98188	0
ENSMUSG00000019942	Cdc2a	4.02485	11.1867	0	2	0	93.3765	138.206	17.2117	10
ENSMUSG00000019944	Rhobtb1	6.34605	4.22987	0	0	0	26.0129	16.5246	17.3172	0
ENSMUSG00000019947	Arid5b	7.51007	5.53872	1	4	1	56.5782	20.2251	32.6274	116
ENSMUSG00000019948	Actr6	4.34504	8.79792	0	0	0	60.7747	47.3328	14.5991	4
ENSMUSG00000019952	Wdr51b	6.48993	5.56357	0	0	0	41.2028	17.1421	20.7051	0
ENSMUSG00000019953	Tbpl1	4.81019	7.01753	0	0	0	36.0088	16.1061	13.6791	0
ENSMUSG00000019960	Dusp6	2.08882	10.4215	0	0	0	23.2479	31.151	14.4221	0
ENSMUSG00000019961	Tmpo	5.03817	10.1978	0	0	0	151.449	141.514	19.3182	14
ENSMUSG00000019969	Psen1	5.55453	8.57662	0	0	0	109.72	64.7778	19.368	3
ENSMUSG00000019970	Sgk	6.91455	11.4166	0	2	0	397.419	386.522	42.1793	2
ENSMUSG00000019971	BC004690	5.41078	3.91798	1	0	0	16.5379	12.5109	12.1373	0
ENSMUSG00000019977	Hbs1l	6.19936	4.93427	1	0	0	30.8177	15.9523	17.4398	0
ENSMUSG00000019978	Epb4.1l2	6.99071	8.22841	0	1	0	154.132	70.0804	32.6717	64
ENSMUSG00000019979	Apaf1	6.52518	8.29236	1	0	0	136.446	67.4882	26.9077	1
ENSMUSG00000019984	Crsp3	5.44039	7.64474	2	0	0	67.1892	31.0556	17.1755	0
ENSMUSG00000019986	Ahi1	6.92078	5.69929	0	0	0	49.5546	18.7834	25.1751	4
ENSMUSG00000019987	Arg1	3.61117	2.12793	0	0	0	2.20123	3.1263	7.18609	0
ENSMUSG00000019988	Nedd1	5.23492	6.78782	0	0	0	40.5722	16.619	14.9572	1
ENSMUSG00000019990	Pde7b	8.36226	3.74903	0	0	0	40.832	20.8259	42.9211	8
ENSMUSG00000019996	Mtap7	7.06292	8.59524	1	0	0	186.228	92.8209	34.8955	29
ENSMUSG00000019997	Ctgf	1.6663	10.809	0	0	0	21.4363	27.3284	15.1649	0
ENSMUSG00000019998	Stx7	5.30743	8.55408	0	0	0	97.9025	58.8263	17.9271	0
ENSMUSG00000020000	Moxd1	6.30865	5.25029	0	0	0	35.1878	16.3243	18.7204	0
ENSMUSG00000020003	Pex7	5.56224	7.71833	1	0	0	73.2461	34.0996	17.9607	2
ENSMUSG00000020010	Vnn3	4.20187	2.50894	0	0	0	4.26971	5.07513	8.04899	0
ENSMUSG00000020017	Hal	4.80705	2.20702	0	0	0	5.62821	5.7719	8.83385	1
ENSMUSG00000020019	Ntn4	6.72096	2.93442	0	0	0	17.5214	13.7286	17.9591	1
ENSMUSG00000020023	Tmcc3	6.21801	9.215	0	0	0	179.948	118.368	25.9025	4
ENSMUSG00000020029	Nudt4	4.066	9.74671	1	0	0	68.387	73.4782	15.1954	15
ENSMUSG00000020032	Nuak1	6.11201	7.96007	0	0	0	101.01	47.734	22.2071	1
ENSMUSG00000020037	Rfx4	7.23209	4.7769	0	0	1	41.239	19.4459	26.6734	4
ENSMUSG00000020042	Btbd11	8.08803	2.68967	0	0	0	23.6911	14.9226	33.7193	2
ENSMUSG00000020044	Timp3	5.61389	5.34093	0	0	0	28.181	13.5967	14.7173	1
ENSMUSG00000020052	Ascl1	7.16146	3.18905	0	0	0	22.6666	16.1101	22.35	0
ENSMUSG00000020053	Igf1	6.18482	3.83124	0	0	0	21.3923	15.4126	15.6916	10
ENSMUSG00000020062	Slc5a8	5.44367	2.29654	0	0	0	8.1115	7.59054	10.5819	0
ENSMUSG00000020063	Sirt1	4.32754	9.34633	0	0	0	73.7075	66.468	15.2959	2
ENSMUSG00000020064	Herc4	6.17716	9.97666	5	0	0	226.38	179.546	27.3278	24
ENSMUSG00000020070	Rufy2	5.20781	4.07034	0	0	0	15.9386	11.8348	11.5993	3
ENSMUSG00000020074	Ccar1	5.57879	10.1339	3	0	0	190.074	164.878	22.4811	15
ENSMUSG00000020076	Ddx50	5.14241	9.57023	0	0	0	133.016	105.984	18.7642	2
ENSMUSG00000020079	Supv3l1	4.35269	8.74899	0	0	0	59.9133	45.9485	14.5546	2
ENSMUSG00000020080	Hkdc1	5.29723	2.19295	0	0	0	7.21674	6.88009	10.0351	0
ENSMUSG00000020081	Tacr2	3.71951	3.27278	0	0	0	4.16898	5.26571	8.06732	0
ENSMUSG00000020085	Amid	4.54788	2.3367	0	0	0	5.07385	5.50389	8.44507	2
ENSMUSG00000020088	Sara1	3.69789	8.96856	0	0	0	39.0059	38.2413	13.4942	2
ENSMUSG00000020089	Pyp	4.67497	11.3891	0	0	0	157.367	201.219	19.7255	3
ENSMUSG00000020091	Eif4ebp2	4.34191	10.9503	1	0	0	114.506	147.072	17.7382	3
ENSMUSG00000020092	X99384	5.99313	8.3916	1	1	0	118.926	64.1926	22.1075	5
ENSMUSG00000020097	Sgpl1	5.653	7.2415	0	0	0	59.9036	24.9335	17.712	6
ENSMUSG00000020098	Pcbd1	2.31063	2.4902	0	0	0	1.18886	1.66181	6.99927	1
ENSMUSG00000020099	Unc5b	6.09005	7.38725	0	0	0	75.4254	31.0535	20.9108	0
ENSMUSG00000020107	D10Ertd641	3.92638	8.55283	1	1	0	39.4003	32.5093	13.3665	3
ENSMUSG00000020108	Ddit4	1.06764	8.75537	1	0	0	9.48031	5.79765	13.0858	0
ENSMUSG00000020109	Dnajb12	4.20563	7.60168	0	0	0	31.2198	18.3024	12.7856	0
ENSMUSG00000020111	Cbara1	7.01985	7.49621	1	0	0	108.572	40.5652	30.9742	0
ENSMUSG00000020114	Cand1	5.2277	10.5042	1	0	0	179.451	174.724	20.9137	0
ENSMUSG00000020115	Tbk1	5.33228	7.17122	2	1	0	50.7553	21.5025	15.9283	2
ENSMUSG00000020120	Plek	5.21944	5.11946	0	0	0	22.2839	11.9404	12.7997	0
ENSMUSG00000020122	Egfr	7.33724	4.6171	0	0	0	40.5715	19.7772	27.6214	0
ENSMUSG00000020123	Avpr1a	2.30889	5.34758	0	0	0	3.50019	2.57931	9.07132	0
ENSMUSG00000020124	Usp15	6.41883	3.36701	2	0	0	19.2405	14.8141	16.483	3
ENSMUSG00000020128	Vps54	6.35502	8.62064	1	0	0	149.256	82.6533	25.8858	77
ENSMUSG00000020130	Tbc1d15	5.7494	10.1198	4	0	0	202.115	172.269	23.7484	12
ENSMUSG00000020132	Rab21	4.69911	8.75797	1	0	0	76.8849	53.8688	15.6185	2
ENSMUSG00000020134	Peli1	5.88264	8.52761	0	0	0	121.511	68.8251	21.5182	5
ENSMUSG00000020135	Apc2	3.83673	2.3922	0	0	0	3.00969	4.00447	7.55326	0
ENSMUSG00000020140	Lgr5	7.08588	3.359	0	0	0	23.8412	16.7256	21.9247	0
ENSMUSG00000020142	Slc1a4	4.92918	7.33952	0	0	0	45.1032	20.7967	14.4959	0
ENSMUSG00000020149	Rab1	4.66744	12.3141	1	2	0	177.847	269.44	21.4175	22
ENSMUSG00000020150	Gamt	1.49262	6.47789	0	0	0	3.71929	1.74553	10.3321	4
ENSMUSG00000020152	Actr2	5.66135	11.0544	4	0	1	241.946	252.884	25.1032	4
ENSMUSG00000020153	Ndufs7	2.87598	9.65787	0	0	0	28.1541	35.7154	13.5248	5
ENSMUSG00000020154	Ptprb	6.72483	2.65011	0	0	0	15.3058	12.2858	17.5306	0
ENSMUSG00000020155	Kcnmb1	2.9982	4.94152	0	0	0	4.51331	4.03139	8.86112	0
ENSMUSG00000020159	Gabrp	4.81645	6.49978	0	0	1	28.7128	12.4727	13.0705	0
ENSMUSG00000020163	Uqcr	1.9381	9.95581	0	0	0	19.3089	22.3839	13.8818	10
ENSMUSG00000020170	Frs2	6.29245	8.46046	0	0	0	136.189	72.658	24.8936	19
ENSMUSG00000020175	Rab36	4.08848	4.36084	0	0	0	8.42832	7.44321	9.35241	0
ENSMUSG00000020178	Adora2a	3.16816	5.34734	0	0	0	5.687	4.46415	9.27931	0
ENSMUSG00000020180	Snrpd3	4.12474	11.7907	0	1	0	111.374	179.302	18.4575	13
ENSMUSG00000020182	Ddc	6.39227	7.51374	0	0	0	89.14	36.4783	23.7605	16
ENSMUSG00000020183	Cpm	4.68291	5.34149	0	0	0	17.6822	9.72015	11.414	3
ENSMUSG00000020189	Osbpl8	7.04926	4.33744	2	0	0	33.9497	18.9474	23.5655	9
ENSMUSG00000020190	Mknk2	3.39903	6.88016	0	0	0	11.7317	7.42457	10.8442	0
ENSMUSG00000020196	Cabin1	6.88523	4.57697	2	0	0	34.758	18.4608	22.3834	22
ENSMUSG00000020198	Ap3d1	5.14049	9.18246	0	0	0	116.358	84.2611	18.1059	1
ENSMUSG00000020205	Phlda1	1.21226	9.02221	0	0	0	10.988	7.71423	13.2586	0
ENSMUSG00000020231	Dip2	6.36564	5.95489	0	0	0	44.9127	17.3974	20.4092	0
ENSMUSG00000020235	Fzr1	3.52268	9.09663	1	0	0	35.8056	37.681	13.4069	2
ENSMUSG00000020238	Ncln	3.33743	7.83974	0	0	0	17.9446	13.7735	11.7725	0
ENSMUSG00000020248	Nfyb	3.95196	8.9114	1	5	0	46.6743	42.1231	13.8569	16
ENSMUSG00000020251	Glt8d2	5.32977	3.88051	0	0	0	15.7502	12.1272	11.8075	0
ENSMUSG00000020253	Ppm1m	2.31846	6.40576	0	0	0	5.04516	3.04757	9.985	4
ENSMUSG00000020256	Aldh1l2	5.54266	4.33709	0	0	0	20.1534	13.378	13.133	0
ENSMUSG00000020260	Pofut2	3.35952	6.17994	0	0	0	8.53381	5.49411	10.1439	5
ENSMUSG00000020261	Slc36a1	4.88445	3.9702	0	0	0	12.996	10.4054	10.5602	0
ENSMUSG00000020262	Adarb1	6.99886	6.04732	0	0	0	57.1221	19.9672	26.903	1
ENSMUSG00000020263	Dip3b	5.60383	5.98459	0	0	0	34.5371	14.3179	15.5519	0
ENSMUSG00000020264	Slc36a2	4.6856	2.1532	0	0	0	5.07011	5.34819	8.55149	0
ENSMUSG00000020267	Hint1	2.03527	12.0914	0	0	1	30.5757	55.8756	16.8033	64
ENSMUSG00000020271	Fbxw11	6.70137	9.53424	1	0	0	236.253	158.38	32.4167	14
ENSMUSG00000020272	Stk10	6.51227	5.31717	0	0	0	38.4717	17.0754	20.4327	2
ENSMUSG00000020273	Papolg	5.02755	8.47985	0	0	0	82.7098	50.4558	16.4838	3
ENSMUSG00000020282	Rhbdf1	3.66152	8.63207	0	0	0	33.0601	29.873	13.036	1
ENSMUSG00000020283	Pex13	4.28222	8.34547	0	0	0	47.5803	33.316	13.8569	16
ENSMUSG00000020289	Mare	5.18543	5.794	0	0	0	27.0469	12.1404	13.4788	1
ENSMUSG00000020290	Xpo1	5.37372	11.4888	2	1	0	232.297	271.041	23.8595	27
ENSMUSG00000020297	Nsg2	5.87708	3.58644	0	0	0	17.4487	13.6638	13.7158	1
ENSMUSG00000020300	Cpeb4	6.01558	6.57844	0	0	0	50.3963	19.0782	18.9067	0
ENSMUSG00000020303	Stc2	3.40885	7.01869	0	0	0	12.604	8.08686	10.9904	0
ENSMUSG00000020305	Asb3	7.21237	6.33468	0	0	0	67.9268	22.1582	30.4429	8
ENSMUSG00000020308	Gtrgeo22	2.77631	6.6734	0	2	0	7.16706	4.58241	10.2822	113
ENSMUSG00000020312	Shc2	4.19164	6.05376	0	0	0	15.553	8.32468	11.0846	0
ENSMUSG00000020315	Spnb2	6.91086	11.0601	2	0	0	372.672	338.417	40.7701	6
ENSMUSG00000020321	Mdh1	3.91112	10.6718	0	0	0	76.9087	106.054	16.1673	0
ENSMUSG00000020325	Fstl3	2.41549	5.73736	0	0	0	4.1662	2.83093	9.39497	0
ENSMUSG00000020326	Ccng1	2.74846	10.6932	0	0	0	34.3731	54.5003	14.797	2
ENSMUSG00000020327	Fgf22	1.80033	4.13222	0	0	0	1.92938	1.80742	8.22435	1
ENSMUSG00000020328	Nudcd2	2.67288	9.98052	0	1	0	27.5933	37.2392	13.8457	18
ENSMUSG00000020331	Hcn2	4.28355	4.19712	0	0	0	9.30948	8.14223	9.51206	0
ENSMUSG00000020333	Acsl6	5.84119	2.69016	0	0	0	11.5202	10.1853	12.4872	0
ENSMUSG00000020334	Slc22a4	5.49073	2.75016	0	0	0	10.3708	9.40374	11.1879	0
ENSMUSG00000020335	Zfp354b	3.19582	3.46815	0	0	0	3.09128	4.11761	7.83818	0
ENSMUSG00000020340	Cyfip2	6.88796	7.42091	0	0	0	100.268	37.6072	29.0089	0
ENSMUSG00000020349	Ppp2ca	4.58051	11.835	2	0	0	157.96	224.664	20.1306	9
ENSMUSG00000020354	Sgcd	8.64573	2.58183	0	0	0	26.2855	14.7742	45.0412	0
ENSMUSG00000020357	Flt4	5.40949	6.82749	0	0	0	44.642	17.999	15.7987	0
ENSMUSG00000020358	Hnrpab	2.75446	12.5687	2	0	0	45.9806	103.467	17.5453	4
ENSMUSG00000020361	Hspa4	5.27858	12.2441	4	2	0	246.888	333.627	24.849	39
ENSMUSG00000020363	Gfpt2	5.47336	9.0933	1	0	0	130.77	89.2566	19.7879	16
ENSMUSG00000020366	Mapk9	5.30954	7.28813	1	0	0	53.1933	23.0564	15.9913	4
ENSMUSG00000020368	Canx	4.96019	10.3128	2	3	0	149.586	145.116	19.1338	14
ENSMUSG00000020374	Rasgef1c	6.30674	2.49379	0	0	0	12.3139	10.53	14.5665	0
ENSMUSG00000020375	Rufy1	5.38574	3.87329	1	0	0	16.0968	12.3453	11.9974	3
ENSMUSG00000020380	Rad50	5.8512	8.43697	0	0	0	115.384	63.8896	21.1088	1
ENSMUSG00000020386	Sara2	4.81962	9.76573	0	1	0	118.632	104.342	17.5927	22
ENSMUSG00000020387	Phf15	5.46028	7.92838	0	0	0	77.9856	38.7188	17.7311	4
ENSMUSG00000020388	Pdlim4	3.81116	2.86959	0	0	0	3.72899	4.83092	7.86257	0
ENSMUSG00000020389	Cdkl3	5.59285	2.93117	0	0	0	11.7761	10.4068	11.7465	11
ENSMUSG00000020390	Ube2b	3.89006	10.654	1	0	0	75.3272	104.103	16.0962	59
ENSMUSG00000020392	D11Ertd497	3.27411	8.87521	0	0	0	27.507	28.309	12.8715	1
ENSMUSG00000020393	Kremen1	6.1305	7.05064	0	0	0	64.9421	25.1317	20.5898	2
ENSMUSG00000020395	Itk	6.02374	2.36321	0	0	0	10.4472	9.26524	12.9354	0
ENSMUSG00000020397	Crsp9	2.20789	9.93215	0	0	0	21.5509	26.6679	13.7661	1
ENSMUSG00000020402	Vdac1	3.91972	11.4911	0	1	0	90.3976	146.232	17.4352	32
ENSMUSG00000020409	D11Ertd730	3.83299	7.87825	0	0	0	26.6211	18.6662	12.4206	1
ENSMUSG00000020413	Hus1	4.17177	7.92401	0	0	0	35.6759	22.9489	13.0926	1
ENSMUSG00000020423	Btg2	1.92334	8.10923	0	0	0	9.47532	6.77776	11.7456	0
ENSMUSG00000020427	Igfbp3	2.96569	10.5713	0	0	0	38.0171	59.261	14.7475	0
ENSMUSG00000020428	Gabra6	3.852	3.41964	0	0	0	4.93183	5.87893	8.30745	0
ENSMUSG00000020430	Pes1	3.55655	9.21961	0	0	0	38.4219	41.4494	13.6018	3
ENSMUSG00000020435	Osbp2	7.32315	7.16159	0	0	0	101.254	33.731	34.5645	0
ENSMUSG00000020436	Gabrg2	6.47285	2.76911	0	0	1	14.917	12.2666	15.9563	0
ENSMUSG00000020437	Myo1g	3.8487	3.30911	0	0	0	4.69175	5.69906	8.22108	1
ENSMUSG00000020440	Arf5	1.51602	7.28953	0	0	0	5.42998	2.75933	11.1068	0
ENSMUSG00000020444	Guk1	2.9895	9.10419	0	0	0	24.9535	27.6561	12.9231	6
ENSMUSG00000020448	Rnf185	5.20844	7.38007	0	0	0	53.1294	23.7181	15.6657	13
ENSMUSG00000020453	Zfp278	4.20688	2.49578	1	0	0	4.25837	5.05782	8.04603	21
ENSMUSG00000020456	Ogdh	6.02239	8.3146	15	0	0	Hotspot	61.0818	22.1879	12
ENSMUSG00000020457	Drg1	4.04194	9.92126	0	2	0	70.6389	79.6032	15.3829	10
ENSMUSG00000020458	Rtn4	5.68114	12.7502	1	0	0	307.155	435.638	29.4711	52
ENSMUSG00000020459	Mtif2	4.23381	8.36909	2	0	0	46.3265	33.1341	13.7723	6
ENSMUSG00000020463	AW011752	5.54578	9.19471	0	0	0	139.789	97.2762	20.4286	4
ENSMUSG00000020467	Efemp1	6.20038	8.37668	0	0	0	127.019	66.8608	23.844	0
ENSMUSG00000020469	Myl7	1.09626	2.41565	0	0	0	0.728194	0.671045	7.34439	0
ENSMUSG00000020471	Pold2	2.24641	9.42327	0	0	0	18.7219	20.7102	13.1384	8
ENSMUSG00000020473	Aebp1	3.35248	6.5624	0	0	0	9.86576	6.19539	10.4963	0
ENSMUSG00000020475	Pgam2	1.0635	2.36686	0	0	0	0.703896	0.640076	7.33102	2
ENSMUSG00000020476	Dbnl	3.6361	8.55015	1	0	0	31.2879	27.7998	12.9043	0
ENSMUSG00000020485	Supt4h1	2.59979	3.28989	0	0	0	2.00487	2.70924	7.53469	3
ENSMUSG00000020496	Rnf187	2.72879	10.221	0	0	0	30.3742	43.4716	14.1692	0
ENSMUSG00000020514	Mrpl22	2.98277	9.78093	0	0	0	31.1906	40.8019	13.7374	6
ENSMUSG00000020515	Cnot8	3.8522	8.80573	1	0	0	41.3103	37.2808	13.5441	13
ENSMUSG00000020516	Rps6kb1	5.45776	8.5059	2	0	0	102.268	59.7239	18.6707	10
ENSMUSG00000020520	Galnt10	7.15036	6.10193	0	0	0	61.096	20.6735	28.9639	3
ENSMUSG00000020522	Mfap3	3.60857	8.36731	0	0	0	28.2213	23.9645	12.6555	2
ENSMUSG00000020525	Ppm1d	5.16241	7.75815	0	0	0	62.7269	30.7509	16.0065	0
ENSMUSG00000020526	Znhit3	2.43349	9.14308	0	0	0	18.5608	19.8391	12.7977	2
ENSMUSG00000020528	Prpsap2	5.01841	9.12729	0	0	0	107.137	77.8395	17.4399	3
ENSMUSG00000020532	Acaca	7.70441	9.61703	3	0	0	331.812	192.132	51.9827	0
ENSMUSG00000020534	Shmt1	4.52394	9.3281	1	0	0	84.6957	71.889	15.8503	12
ENSMUSG00000020536	Llglh	3.8538	8.86702	0	0	0	42.3973	38.8748	13.6225	0
ENSMUSG00000020537	Drg2	3.8165	8.52335	0	0	0	35.6273	30.0546	13.1424	1
ENSMUSG00000020544	Cox11	2.75788	8.99265	0	0	0	20.8519	22.2787	12.6842	2
ENSMUSG00000020547	Bzw2	6.02181	9.37126	1	0	0	177.502	123.872	24.4157	24
ENSMUSG00000020549	Elac2	4.52187	7.72337	0	0	0	42.0937	23.1914	13.6966	3
ENSMUSG00000020553	Pctp	4.27969	6.26746	0	0	0	18.0102	9.13199	11.4704	0
ENSMUSG00000020570	Sypl	4.58809	9.48621	0	0	0	93.4801	81.1036	16.292	1
ENSMUSG00000020571	Pdia6	4.18396	9.93219	0	0	0	79.3161	85.8659	15.7409	2
ENSMUSG00000020572	Pbef1	4.96037	9.26368	2	0	0	109.091	82.8092	17.397	25
ENSMUSG00000020573	Pik3cg	5.135	3.9885	0	0	0	14.9517	11.4567	11.2842	0
ENSMUSG00000020580	Rock2	6.53327	8.06423	0	0	0	122.736	56.8616	26.444	1
ENSMUSG00000020581	Agr2	3.48207	2.88908	0	0	0	2.91971	4.06394	7.60402	0
ENSMUSG00000020583	Matn3	4.58844	6.20005	0	0	0	22.0443	10.3183	12.0919	0
ENSMUSG00000020585	Laptm4a	4.09288	11.1258	0	0	0	97.4936	139.729	17.2914	10
ENSMUSG00000020589	D12Ertd553	6.82562	5.19262	0	0	0	41.0764	18.1221	23.0603	15
ENSMUSG00000020590	Snx13	6.64789	7.78751	0	0	0	111.286	47.1193	27.0465	0
ENSMUSG00000020593	Lpin1	6.23542	5.7376	0	0	0	39.9451	16.419	19.0193	1
ENSMUSG00000020594	Pum2	6.28878	9.73727	2	1	0	219.316	162.567	27.9118	28
ENSMUSG00000020599	Rgs9	6.18537	6.97862	0	0	0	63.9789	24.3944	20.8834	0
ENSMUSG00000020601	Trib2	4.64449	4.94835	0	0	0	15.312	9.57414	10.9224	0
ENSMUSG00000020608	Smc6l1	5.75232	8.81272	1	0	0	130.703	80.9125	21.113	4
ENSMUSG00000020611	Gna13	5.07279	7.14451	2	0	0	44.2864	19.2861	14.7772	7
ENSMUSG00000020612	Prkar1a	4.2592	9.53713	1	0	0	74.5542	71.8988	15.3783	2
ENSMUSG00000020614	BC029169	5.62451	2.40534	0	0	0	9.22011	8.44916	11.3144	0
ENSMUSG00000020627	Kbtbd9	8.22742	3.06257	0	0	0	29.4123	17.3547	37.5316	2
ENSMUSG00000020629	AL024210	2.6731	2.79065	0	0	0	1.65896	2.39562	7.21031	4
ENSMUSG00000020634	Ubxd4	4.83097	9.71244	1	1	0	117.515	101.844	17.5549	138
ENSMUSG00000020635	Fkbp1b	3.07399	4.80318	0	0	0	4.54071	4.23283	8.78416	1
ENSMUSG00000020639	Pfn4	3.23159	3.05868	0	0	0	2.64678	3.73485	7.57017	0
ENSMUSG00000020640	Itsn2	6.65477	4.34282	0	0	0	29.9393	17.6798	19.8431	0
ENSMUSG00000020641	Rsad2	3.72879	3.59054	0	0	0	4.7995	5.72486	8.31217	0
ENSMUSG00000020642	Rnf144	6.76797	6.79025	0	0	0	71.3623	24.8645	26.0013	0
ENSMUSG00000020647	Ncoa1	7.37689	3.53818	0	0	0	28.1317	18.2131	25.5215	78
ENSMUSG00000020648	Dus4l	3.88479	5.63466	0	0	0	10.5864	6.75571	10.2001	9
ENSMUSG00000020649	Rrm2	2.54226	11.5511	0	0	0	36.0414	66.2279	15.9343	1
ENSMUSG00000020650	Bcap29	5.27564	7.63138	1	0	0	62.111	29.104	16.3361	5
ENSMUSG00000020654	Adcy3	6.3466	5.81467	0	0	0	42.5615	16.9856	20	2
ENSMUSG00000020656	Grhl1	5.49429	2.50008	0	0	0	9.18288	8.46914	10.9489	0
ENSMUSG00000020659	Cbll1	3.8341	8.46261	0	0	0	35.1678	29.0298	13.0989	1
ENSMUSG00000020661	Dnmt3a	6.01855	8.17272	2	0	0	108.341	54.8285	21.8735	21
ENSMUSG00000020664	Dld	4.31129	9.10471	0	0	0	66.751	56.9082	14.9211	0
ENSMUSG00000020669	Sh3yl1	5.22562	6.04719	0	0	0	30.0499	12.7975	13.9483	0
ENSMUSG00000020672	Sntg2	7.64943	2.91951	0	0	0	23.2582	15.6584	27.5448	0
ENSMUSG00000020677	Ddx52	4.32315	9.00827	0	0	0	64.9506	53.8208	14.8222	2
ENSMUSG00000020680	Taf15	5.07181	2.94759	1	3	0	9.40855	8.78254	10.0942	2
ENSMUSG00000020681	Ace	4.41285	3.39343	0	0	0	7.57616	7.69082	9.0523	0
ENSMUSG00000020682	Mmp28	4.47606	2.28037	0	0	0	4.6825	5.19188	8.28243	1
ENSMUSG00000020687	Cdc27	4.91695	2.97852	0	1	0	8.78201	8.37392	9.72872	3
ENSMUSG00000020689	Itgb3	5.89045	2.36622	0	0	0	9.97792	8.95646	12.3358	0
ENSMUSG00000020691	Mettl2	3.79981	7.86236	0	0	0	25.7252	18.1212	12.3518	1
ENSMUSG00000020692	Nle1	2.92619	7.46827	2	0	0	11.4054	8.16543	11.1093	1
ENSMUSG00000020694	Tlk2	6.64667	6.07003	1	0	0	51.3722	18.8356	23.1313	12
ENSMUSG00000020695	Mrc2	5.86688	5.81668	0	0	0	36.0012	15.0777	16.7328	3
ENSMUSG00000020696	Rffl	6.06443	7.20892	0	0	0	68.4809	27.333	20.3812	7
ENSMUSG00000020697	Lig3	4.43676	8.21607	1	0	0	50.338	32.4723	14.0862	3
ENSMUSG00000020698	Cct6b	5.49368	2.75887	0	0	0	10.427	9.44545	11.207	7
ENSMUSG00000020700	Map3k3	6.14598	7.21206	0	0	0	70.5728	27.9509	21.0153	0
ENSMUSG00000020701	Gm644	5.84368	5.25371	0	0	0	29.9113	14.519	15.7715	0
ENSMUSG00000020705	Ddx42	5.00962	7.87507	1	0	0	61.499	31.7648	15.5312	6
ENSMUSG00000020706	Ftsj3	2.73531	9.85713	0	0	0	27.5724	36.3678	13.7112	1
ENSMUSG00000020708	Psmc5	2.79992	10.9541	0	0	0	37.373	62.705	15.1739	10
ENSMUSG00000020709	Centa2	4.62521	2.91465	0	0	0	7.11184	7.26207	9.04432	8
ENSMUSG00000020710	Smarcd2	2.14958	7.80932	0	0	0	9.00767	6.31313	11.3645	0
ENSMUSG00000020715	Ern1	6.49469	7.31069	1	0	0	83.4442	32.3188	24.3095	4
ENSMUSG00000020716	Nf1	7.91718	2.17272	1	0	0	17.3726	11.6376	29.4549	7
ENSMUSG00000020721	Helz	7.1279	6.85638	7	0	0	82.5098	27.3468	30.698	47
ENSMUSG00000020722	Cacng1	3.68471	3.52768	0	0	0	4.51973	5.51563	8.22388	0
ENSMUSG00000020723	Cacng4	5.8993	5.23187	0	0	0	30.3172	14.7404	16.0495	0
ENSMUSG00000020732	Rab37	6.14564	4.52646	0	0	0	26.7081	15.8368	16.4679	0
ENSMUSG00000020733	Slc9a3r1	4.15688	9.07264	0	0	0	58.4776	51.7946	14.4963	1
ENSMUSG00000020734	Grin2c	4.17592	2.4373	0	0	0	4.03561	4.85357	7.96304	0
ENSMUSG00000020736	Nt5c	0.511974	8.66202	0	0	0	7.9481	3.54029	13.6563	1
ENSMUSG00000020738	Sumo2	5.67061	12.7387	1	0	0	305.606	432.993	29.3382	6
ENSMUSG00000020740	Gga3	4.29506	7.22745	6	0	0	Hotspot	14.6791	12.548	3
ENSMUSG00000020745	Pafah1b1	5.66445	8.75463	1	13	0	123.482	Hotspot	20.3955	140
ENSMUSG00000020755	Hcngp	4.9944	7.33929	5	0	0	46.7419	21.3202	14.7364	11
ENSMUSG00000020766	Galk1	2.08508	9.66064	0	0	0	18.811	21.2058	13.461	2
ENSMUSG00000020770	Zc3h5	4.94949	6.09733	2	1	0	26.5795	11.6805	13.0165	21
ENSMUSG00000020773	Trim47	2.15931	2.43241	0	0	0	1.07685	1.4605	6.97533	2
ENSMUSG00000020774	Aspa	4.29624	4.81653	0	0	0	11.4296	8.20833	10.0843	0
ENSMUSG00000020777	Acox1	4.76325	7.07952	0	0	0	36.0329	16.4104	13.6072	0
ENSMUSG00000020780	Srp68	4.86066	9.643	2	0	0	117.038	99.2081	17.5689	5
ENSMUSG00000020781	Tsen54	3.05918	7.04899	0	0	0	10.0918	6.69771	10.7614	0
ENSMUSG00000020782	Llglh2	4.98532	8.86481	1	1	0	95.1502	64.8969	16.8851	246
ENSMUSG00000020785	Camkk1	4.52488	2.50158	0	0	0	5.42573	5.87342	8.53256	0
ENSMUSG00000020786	Rnf157	4.50583	4.94212	0	0	0	13.8783	9.01464	10.6074	0
ENSMUSG00000020793	Galr2	1.57386	3.90948	0	0	0	1.64164	1.50722	8.1467	1
ENSMUSG00000020794	Ube2g1	6.30621	9.64095	0	6	0	214.139	154.845	27.8576	69
ENSMUSG00000020801	Med31	1.95196	8.13023	0	0	0	9.68395	7.02729	11.7573	0
ENSMUSG00000020803	Txnl5	1.55287	9.77667	0	0	0	15.8493	15.4583	13.8903	0
ENSMUSG00000020806	Rhbdl6	4.85055	6.63267	0	0	0	30.9838	13.3614	13.3367	1
ENSMUSG00000020810	Cygb	3.12416	3.94022	0	0	0	3.54256	4.27458	8.14536	0
ENSMUSG00000020811	BC030477	5.28344	2.44164	0	0	0	8.14418	7.69557	10.2233	0
ENSMUSG00000020817	Rabep1	6.61953	7.65185	6	0	0	103.048	42.3245	26.3998	2
ENSMUSG00000020821	Kif1c	4.89966	7.43266	0	0	0	46.4483	21.9426	14.5127	0
ENSMUSG00000020826	Nos2	5.29906	1.94822	0	0	0	6.35491	6.09414	9.81993	0
ENSMUSG00000020828	Pld2	4.16567	4.14007	0	0	0	8.32872	7.67302	9.27832	0
ENSMUSG00000020829	D11Ertd18e	2.63877	5.41172	0	0	0	4.22147	3.21388	9.14043	3
ENSMUSG00000020836	Coro6	2.48259	6.00199	0	0	0	4.71017	3.06896	9.62553	0
ENSMUSG00000020838	Slc6a4	5.0766	2.26478	0	0	0	6.73711	6.5854	9.49981	2
ENSMUSG00000020840	Blmh	5.37972	8.80814	1	0	0	112.485	71.8885	18.741	4
ENSMUSG00000020841	Cpd	6.03073	6.09625	0	0	0	42.0214	16.4868	18.1974	0
ENSMUSG00000020843	Timm22	3.18634	8.00849	0	0	0	17.5847	14.3319	11.8275	0
ENSMUSG00000020844	Nxn	7.14872	5.4251	1	0	0	48.8655	19.1702	27.2179	44
ENSMUSG00000020847	Rph3al	6.55016	3.69777	0	0	0	23.0212	16.3775	17.9167	0
ENSMUSG00000020848	Doc2b	4.75318	2.62988	0	0	0	6.74121	6.84406	9.06576	0
ENSMUSG00000020850	Prpf8	4.50004	11.2281	1	0	0	135.641	175.9	18.7434	0
ENSMUSG00000020859	Spag9	7.02212	8.61199	0	0	2	185.167	93.3184	34.3099	0
ENSMUSG00000020864	Ankrd40	3.52995	7.83518	0	0	0	20.5898	15.3203	11.965	8
ENSMUSG00000020865	Abcc3	5.63285	3.14534	0	0	0	13.1977	11.3371	12.1331	0
ENSMUSG00000020866	Cacna1g	6.02784	1.95708	0	0	0	8.47443	7.60727	12.486	0
ENSMUSG00000020869	AA959742	3.94636	10.821	0	0	0	81.6784	114.985	16.4661	6
ENSMUSG00000020873	Slc35b1	2.75082	8.86567	0	0	0	19.7597	20.4082	12.5365	4
ENSMUSG00000020875	Hoxb9	2.13192	5.35695	0	0	0	3.2363	2.28614	9.1	1
ENSMUSG00000020876	Snx11	3.3189	5.07527	1	0	0	5.80306	4.87629	9.14748	8
ENSMUSG00000020882	Cacnb1	4.30276	6.74104	1	0	0	22.2715	11.0827	12.0224	4
ENSMUSG00000020886	Dlgh4	4.73715	5.07209	0	0	0	16.8819	9.9368	11.2739	1
ENSMUSG00000020888	Dvl2	3.16559	7.55856	2	0	0	13.8787	10.0875	11.3395	0
ENSMUSG00000020889	Nr1d1	2.82477	1.72435	0	0	0	1.04695	1.59605	6.5718	1
ENSMUSG00000020890	Gucy2e	3.80612	2.41902	0	0	0	2.97745	3.98892	7.54289	0
ENSMUSG00000020892	Aloxe3	4.50703	4.53894	0	0	0	12.2839	9.07195	10.2288	0
ENSMUSG00000020894	Vamp2	4.35664	5.668	0	0	0	15.5217	8.54471	11.0125	1
ENSMUSG00000020899	Pfas	2.87833	9.90752	0	0	0	30.3915	40.8731	13.8359	0
ENSMUSG00000020900	Myh10	6.96183	10.7273	2	0	0	354.102	298.301	40.4623	3
ENSMUSG00000020901	Pik3r5	6.00293	2.77093	0	0	0	12.6948	10.9912	13.3218	0
ENSMUSG00000020902	Ntn1	7.43584	2.24404	0	0	0	15.6152	11.4316	23.343	12
ENSMUSG00000020903	Stx8	7.91112	7.64008	0	0	1	152.971	50.3808	48.2265	31
ENSMUSG00000020907	Rcvrn	3.00144	2.23408	0	0	0	1.5226	2.30601	6.93189	0
ENSMUSG00000020908	Myh4	4.30903	4.35001	0	0	0	9.98372	8.27839	9.68808	0
ENSMUSG00000020911	Krt1-19	2.35332	8.95044	0	0	0	16.5871	16.6303	12.5766	0
ENSMUSG00000020917	Acly	5.68779	11.2119	1	1	0	251.599	270.635	25.6877	8
ENSMUSG00000020918	Gcn5l2	2.9458	9.15973	0	0	0	24.7961	27.8699	12.9631	1
ENSMUSG00000020925	D11Ertd707	3.70609	7.82735	1	0	0	23.4813	16.7813	12.1778	3
ENSMUSG00000020926	Adam11	4.22358	2.71643	0	0	0	4.81082	5.60156	8.23157	0
ENSMUSG00000020932	Gfap	3.29057	5.63192	0	0	0	6.74884	4.86004	9.60117	0
ENSMUSG00000020936	Nmt1	5.23128	11.133	3	6	0	204.964	226.813	22.1642	7
ENSMUSG00000020941	Map3k14	5.58442	4.77346	0	0	0	23.4801	13.5318	13.8465	0
ENSMUSG00000020946	Gosr2	4.3817	4.54495	0	0	0	11.2234	8.57201	9.99124	6
ENSMUSG00000020948	Btbd5	4.52963	4.34328	0	0	0	11.7314	9.15184	10.0943	2
ENSMUSG00000020949	Fkbp3	3.52482	11.6062	0	0	0	67.5873	122.949	16.8392	22
ENSMUSG00000020950	Foxg1	3.45325	4.15742	0	0	0	4.79599	5.26891	8.50959	1
ENSMUSG00000020952	Scfd1	6.12901	2.90913	0	0	1	14.1735	11.9663	14.1315	4
ENSMUSG00000020954	Strn3	6.38042	10.6572	0	0	0	287.951	258.855	31.4554	4
ENSMUSG00000020962	Gtf2a1	4.95415	6.22017	5	0	0	27.8697	12.044	13.1778	12
ENSMUSG00000020963	Tshr	7.21642	2.93286	0	0	0	20.5091	14.8932	22.3992	0
ENSMUSG00000020964	Sel1h	5.32186	6.61859	0	0	0	39.1875	15.7918	15.1029	0
ENSMUSG00000020974	Pole2	4.72312	8.39236	1	0	0	66.6213	41.9606	15.19	5
ENSMUSG00000020978	Klhdc2	3.77695	8.92115	0	0	0	40.7493	38.6857	13.5599	2
ENSMUSG00000020982	Sdccag1	5.51204	10.1823	0	0	0	187.459	165.338	22.1078	1
ENSMUSG00000020986	Sec23a	5.73428	9.03032	2	0	0	141.422	92.8506	21.4035	7
ENSMUSG00000020988	L2hgdh	5.10329	8.06364	0	0	0	70.7995	37.9818	16.1939	2
ENSMUSG00000020994	Pnn	2.78952	10.4362	0	1	0	33.1742	49.9622	14.4727	1
ENSMUSG00000021003	Galc	5.834	3.11674	0	0	0	14.0461	11.907	12.9478	0
ENSMUSG00000021010	Npas3	9.67713	5.31451	0	0	0	96.4715	22.6109	104.033	0
ENSMUSG00000021013	Ttc8	5.97154	5.70506	0	0	0	36.0359	15.3273	17.1901	0
ENSMUSG00000021018	Polr2h	2.03773	10.2118	0	0	0	21.5782	27.2528	14.1674	1
ENSMUSG00000021024	Psma6	4.28983	12.1702	0	0	0	133.134	218.262	19.6326	30
ENSMUSG00000021025	Nfkbia	1.58256	10.5553	0	0	0	19.6783	23.0762	14.8833	1
ENSMUSG00000021027	Garnl1	7.76551	6.93729	0	0	0	104.012	31.0037	42.027	1
ENSMUSG00000021028	Mbip	4.13955	8.62515	1	0	0	48.1927	38.0927	13.8811	1
ENSMUSG00000021032	Ngb	2.32452	3.84794	0	0	0	2.18577	2.53591	7.91636	0
ENSMUSG00000021036	Sptlc2	6.32808	8.59151	2	0	3	146.048	80.4835	25.5449	149
ENSMUSG00000021037	Ahsa1	2.86215	11.2728	0	1	0	41.1219	73.68	15.6516	6
ENSMUSG00000021039	Snw1	3.39616	10.2466	0	0	0	46.7679	66.04	14.7153	1
ENSMUSG00000021047	Nova1	6.91946	3.17656	0	0	0	20.8768	15.4416	20.0121	0
ENSMUSG00000021048	Mthfd1	6.01134	10.1596	5	0	0	224.54	188.689	26.1267	15
ENSMUSG00000021051	Ppp2r5e	7.18309	7.0476	1	0	0	91.7885	30.7881	32.0395	98
ENSMUSG00000021054	Sgpp1	4.42062	3.73913	0	0	0	8.76552	8.30012	9.35449	0
ENSMUSG00000021061	Spnb1	6.83155	4.43423	0	0	0	32.6637	18.2905	21.5822	0
ENSMUSG00000021065	Fut8	7.89401	7.60419	0	0	0	149.508	48.9838	47.6513	3
ENSMUSG00000021066	Spg3a	6.19863	3.94179	0	0	0	22.3839	15.664	15.9333	0
ENSMUSG00000021067	Sav1	4.4612	9.10919	0	0	0	74.8168	61.1385	15.3474	3
ENSMUSG00000021069	Pygl	5.20191	2.91204	0	0	0	9.86651	9.08603	10.4248	0
ENSMUSG00000021070	Bdkrb2	4.90212	2.23844	0	0	0	6.04889	6.08571	9.06359	1
ENSMUSG00000021076	Actr10	4.65512	9.73576	0	0	0	105.916	95.9218	16.9041	2
ENSMUSG00000021095	Gsc	1.02006	2.69521	0	0	0	0.819193	0.715138	7.57948	2
ENSMUSG00000021096	Ppm1a	5.08844	9.54754	0	0	0	128.531	102.601	18.4547	11
ENSMUSG00000021099	Six6	2.30889	2.19613	0	0	0	1.02251	1.44737	6.81503	0
ENSMUSG00000021108	Prkch	7.59354	6.84398	0	0	0	94.6554	28.8963	38.2592	0
ENSMUSG00000021109	Hif1a	5.30929	8.04076	4	0	0	77.2044	40.1352	17.1205	3
ENSMUSG00000021111	Papola	5.81957	7.8102	2	3	0	84.5262	39.4239	19.7245	105
ENSMUSG00000021112	Mpp5	6.51827	6.27503	0	0	0	53.0685	19.2842	22.343	1
ENSMUSG00000021114	Atp6v1d	4.21039	10.3301	0	0	0	90.0731	105.714	16.3906	8
ENSMUSG00000021115	Vrk1	6.06865	6.94704	2	0	0	60.5211	23.2714	19.9335	23
ENSMUSG00000021116	Eif2s1	4.62942	8.71466	0	0	0	72.1046	50.7744	15.3233	8
ENSMUSG00000021118	Plek2	4.19061	4.25588	0	0	0	8.83012	7.80558	9.41431	0
ENSMUSG00000021120	Pigh	2.86829	5.92113	1	0	0	5.66376	3.88317	9.63248	0
ENSMUSG00000021123	Rdh12	3.78115	2.70552	0	0	0	3.36524	4.45675	7.7181	0
ENSMUSG00000021125	Arg2	4.67101	2.5801	0	0	0	6.23845	6.47464	8.86091	0
ENSMUSG00000021127	Zfp36l1	2.39342	9.33321	0	0	0	19.475	21.6882	13.02	1
ENSMUSG00000021130	Galntl1	6.41664	4.02352	0	0	0	24.8305	16.5844	17.4795	3
ENSMUSG00000021136	Smoc1	7.31816	7.14084	0	0	0	100.09	33.2626	34.4182	2
ENSMUSG00000021139	Synj2bp	7.93512	8.54441	2	0	0	237.309	99.6122	52.9987	8
ENSMUSG00000021140	Pcnx	7.1379	6.97963	0	0	0	87.6378	29.3627	31.186	1
ENSMUSG00000021143	Pacs2	5.9034	6.95958	0	0	0	57.4078	22.4488	18.8009	1
ENSMUSG00000021144	Mta1	5.28107	9.44019	2	0	0	136.077	103.311	19.2803	8
ENSMUSG00000021147	Wdr37	6.04472	7.81081	0	0	0	91.646	41.8907	21.3701	8
ENSMUSG00000021149	Gtpbp4	4.5579	11.2301	2	0	0	141.388	180.581	18.9667	3
ENSMUSG00000021156	Zmynd11	6.32855	7.65495	2	0	0	93.5874	39.8925	23.4679	5
ENSMUSG00000021171	D12Ertd551	6.90268	4.2117	1	0	0	31.086	18.4265	21.8207	0
ENSMUSG00000021175	Cdca7l	3.77589	7.50141	0	0	0	21.0925	13.6749	11.9192	0
ENSMUSG00000021177	Tdp1	6.01482	8.05388	1	0	0	102.185	50.0337	21.6095	4
ENSMUSG00000021178	Psmc1	3.73249	10.0551	0	0	0	57.3098	72.5329	14.9512	8
ENSMUSG00000021180	Rps6ka5	7.45422	3.62711	4	0	0	29.8561	18.7351	26.6998	2
ENSMUSG00000021186	Fbln5	6.18001	3.66284	0	0	0	20.0207	14.9912	15.4255	0
ENSMUSG00000021187	Mtac2d1	6.02996	2.64468	0	0	0	12.0533	10.5113	13.3002	0
ENSMUSG00000021189	Mjd	5.27161	7.50916	9	0	0	Hotspot	26.5762	16.1372	13
ENSMUSG00000021190	Lgmn	5.51109	7.24329	0	0	0	56.6969	23.8987	16.9272	10
ENSMUSG00000021192	Golga5	4.66698	7.7109	1	0	0	46.2306	24.4635	14.1029	1
ENSMUSG00000021193	Pitrm1	5.00746	9.52243	0	0	0	122.223	98.1434	18.0255	0
ENSMUSG00000021196	Pfkp	6.43992	8.63018	1	1	0	154.243	84.7694	26.8006	0
ENSMUSG00000021200	Asb2	4.10064	5.92771	0	0	0	13.8535	7.78883	10.8015	0
ENSMUSG00000021203	Otub2	4.138	2.54342	0	0	0	4.13049	4.99495	7.99154	0
ENSMUSG00000021218	Gdi2	4.85345	12.5738	0	0	0	205.296	312.441	22.8822	1
ENSMUSG00000021219	Rgs6	7.44907	2.51395	0	0	0	17.9812	12.9678	24.0746	0
ENSMUSG00000021222	Wdr21	3.98504	8.66597	1	0	0	43.3539	36.2837	13.6144	30
ENSMUSG00000021233	Zadh1	4.84639	7.57434	0	0	0	48.3228	23.7977	14.512	2
ENSMUSG00000021235	Coq6	3.55385	7.68584	0	0	0	19.4639	13.8735	11.8313	3
ENSMUSG00000021236	Entpd5	4.92315	6.11483	0	0	0	26.3569	11.6056	12.9517	0
ENSMUSG00000021238	Aldh6a1	4.34206	5.35406	0	0	0	13.9181	8.3595	10.675	1
ENSMUSG00000021239	Chx10	4.67903	5.33466	0	0	0	17.6005	9.70312	11.3973	0
ENSMUSG00000021242	Npc2	4.04536	10.2139	0	0	0	76.7304	92.2567	15.8048	8
ENSMUSG00000021248	Tmed10	4.99349	9.1103	0	0	0	105.057	76.2931	17.3016	47
ENSMUSG00000021250	Fos	1.75232	9.37456	0	0	0	14.9672	14.2459	13.2613	0
ENSMUSG00000021253	Tgfb3	4.44566	1.87056	0	0	0	3.69669	4.17733	7.93321	0
ENSMUSG00000021255	Esrrb	7.35132	9.90968	4	2	1	325.847	215.525	44.9503	22
ENSMUSG00000021257	Angel1	4.69877	6.20984	0	0	0	23.8247	10.8416	12.3932	0
ENSMUSG00000021258	Ccnk	4.55551	6.2977	0	2	0	22.3491	10.4438	12.1168	3
ENSMUSG00000021259	Cyp46a1	4.80095	4.49663	0	0	0	14.742	10.2785	10.8584	0
ENSMUSG00000021263	Degs2	3.59443	3.07995	0	0	0	3.47142	4.63083	7.82109	1
ENSMUSG00000021264	Yy1	4.55649	11.0823	0	1	0	137.482	170.645	18.7086	4
ENSMUSG00000021265	Slc25a29	3.32178	4.79641	0	0	0	5.34708	4.90603	8.92085	0
ENSMUSG00000021270	Hspca	2.42223	13.8077	1	0	1	42.3442	111.851	19.5416	71
ENSMUSG00000021273	Fdft1	5.02875	9.99015	4	0	0	142.461	127.243	18.9111	6
ENSMUSG00000021277	Traf3	6.6525	6.55042	0	0	0	61.9111	21.7708	24.2213	5
ENSMUSG00000021279	Cdc42bpb	6.39885	7.28937	4	0	0	79.9482	31.207	23.3428	3
ENSMUSG00000021282	Eif5	3.09356	10.9601	0	0	0	44.7501	75.3999	15.3751	12
ENSMUSG00000021286	Zfyve21	3.70885	7.49002	1	0	0	19.8944	13.0836	11.8144	4
ENSMUSG00000021288	Kns2	5.64007	7.2387	3	0	0	59.5253	24.7909	17.6327	6
ENSMUSG00000021301	Hecw1	8.20641	2.70102	0	0	0	24.6436	15.129	35.9188	0
ENSMUSG00000021302	Ggps1	3.45589	6.02457	0	1	0	8.65075	5.61669	10.0832	21
ENSMUSG00000021303	Gng4	5.44188	3.0402	0	0	0	11.6534	10.3151	11.3145	0
ENSMUSG00000021318	Gli3	8.04294	7.96222	0	0	0	186.453	65.0129	53.1476	2
ENSMUSG00000021319	Sfrp4	3.27068	2.92264	0	0	2	2.55196	3.64251	7.49764	0
ENSMUSG00000021326	Trim27	3.85908	3.50226	0	0	0	5.13373	6.01894	8.37755	1
ENSMUSG00000021337	Scgn	5.23882	6.77169	0	0	0	40.3528	16.5049	14.9519	0
ENSMUSG00000021356	Irf4	4.14323	2.3438	0	0	0	3.75061	4.57582	7.85456	0
ENSMUSG00000021357	Sec5l1	7.3231	7.10485	2	0	0	98.5215	32.5352	34.3862	8
ENSMUSG00000021359	Tcfap2a	4.26649	6.26681	0	0	0	17.8229	9.07341	11.4436	0
ENSMUSG00000021363	Mak	5.76816	2.60181	0	0	0	10.7401	9.6147	12.0809	0
ENSMUSG00000021364	Elovl2	5.2434	3.41905	0	0	0	12.6212	10.8056	11.0441	0
ENSMUSG00000021365	Nedd9	7.48339	6.77999	0	0	0	88.9465	27.5798	36.0483	0
ENSMUSG00000021368	Tbc1d7	4.29396	2.85974	0	0	0	5.44293	6.12886	8.44024	1
ENSMUSG00000021373	Cap2	7.21074	5.53288	0	0	1	51.5157	19.4319	28.285	9
ENSMUSG00000021374	Nup153	5.56946	10.5698	2	0	0	210.958	201.281	23.3186	6
ENSMUSG00000021375	Kif13a	7.49478	7.81894	1	0	0	147.733	55.1174	39.8315	4
ENSMUSG00000021377	Dek	4.41839	12.2492	0	0	0	148.109	237.068	20.2409	11
ENSMUSG00000021379	Id4	1.38405	5.06943	0	0	0	2.23409	1.3369	9.15334	0
ENSMUSG00000021381	Barx1	1.77315	1.8551	0	0	0	0.680167	0.839768	6.69648	0
ENSMUSG00000021388	Aspn	4.5282	2.98146	0	0	0	6.85892	7.13281	8.9183	0
ENSMUSG00000021390	Ogn	4.04045	2.81155	0	0	0	4.35688	5.31757	8.06752	0
ENSMUSG00000021400	Wrnip1	4.36303	8.66915	0	0	0	58.402	43.6968	14.4767	0
ENSMUSG00000021413	Prpf4b	6.87961	9.37606	2	0	0	237.459	149.275	34.5137	1
ENSMUSG00000021418	Rpp40	3.68706	7.50475	0	0	0	19.7021	13.068	11.8013	2
ENSMUSG00000021427	Ssr1	4.01346	10.566	0	0	0	81.5145	106.74	16.2422	2
ENSMUSG00000021428	Riok1	4.59305	6.80497	1	0	0	28.3512	13.0522	12.7865	1
ENSMUSG00000021432	Slc35b3	4.82731	6.88714	0	0	0	34.2319	15.0418	13.5729	2
ENSMUSG00000021448	Shc3	6.95887	4.87457	0	0	0	38.9697	18.6103	23.7582	3
ENSMUSG00000021451	Sema4d	6.52981	8.32142	0	0	0	138.516	69.0386	27.03	6
ENSMUSG00000021457	Syk	5.70918	4.73654	0	0	0	24.3585	14.0558	14.3751	3
ENSMUSG00000021460	Auh	6.56296	2.72057	0	0	0	15.0169	12.2558	16.4831	0
ENSMUSG00000021464	Ror2	7.42538	7.57357	0	0	1	128.015	45.4889	37.672	1
ENSMUSG00000021466	Ptch1	5.75457	3.52055	0	0	0	16.2434	13.0172	13.071	23
ENSMUSG00000021468	Sptlc1	5.49237	8.32398	0	0	0	95.5243	52.8268	18.5626	1
ENSMUSG00000021469	Msx2	2.37546	5.17355	0	0	0	3.42889	2.69388	8.92657	1
ENSMUSG00000021474	Sfxn1	5.18892	10.0991	0	0	0	159.088	142.467	19.9408	10
ENSMUSG00000021478	Drd1a	2.00144	2.98796	0	0	0	1.31712	1.64118	7.36224	0
ENSMUSG00000021481	Zfp346	4.88289	7.44313	1	0	0	46.2431	21.9612	14.4671	1
ENSMUSG00000021484	Lman2	4.28651	7.84408	0	0	0	37.5081	22.8144	13.2504	2
ENSMUSG00000021485	Mxd3	2.0878	8.55113	1	0	0	12.4499	10.5618	12.1709	11
ENSMUSG00000021488	Nsd1	6.09015	4.26517	5	0	0	24.0895	15.5707	15.7522	58
ENSMUSG00000021490	Slc34a1	3.90699	2.22357	0	0	0	2.92018	3.83708	7.50658	0
ENSMUSG00000021493	Pdlim7	4.15105	10.5774	0	0	0	91.1882	114.872	16.6019	6
ENSMUSG00000021494	Ddx41	2.60999	6.85418	1	0	0	7.08625	4.5104	10.4137	0
ENSMUSG00000021495	BC021381	4.93796	8.5284	1	0	0	80.5036	50.5031	16.1827	1
ENSMUSG00000021500	Ddx46	5.4629	8.66799	1	0	0	109.934	67.1062	18.9773	0
ENSMUSG00000021501	Caml	3.23358	7.15518	1	0	0	11.9055	7.94866	10.9802	0
ENSMUSG00000021504	B4galt7	3.39876	3.94989	0	0	4	4.28868	5.02946	8.31194	1
ENSMUSG00000021506	Pitx1	2.67175	3.75327	0	0	0	2.52073	3.14668	7.86828	0
ENSMUSG00000021508	Cxcl14	2.9835	2.75329	0	0	0	1.95261	2.87083	7.26022	0
ENSMUSG00000021518	Ptdss1	6.03472	8.74879	0	0	0	140.969	83.6608	23.1837	1
ENSMUSG00000021520	Uqcrb	2.24184	10.9682	0	0	0	28.0618	43.6793	15.1166	6
ENSMUSG00000021536	Adcy2	8.56913	6.03649	0	0	0	90.5791	23.4232	59.089	0
ENSMUSG00000021537	Cetn3	3.79348	10.2906	0	0	0	63.9903	84.011	15.3849	2
ENSMUSG00000021539	Lect2	2.59407	4.05035	0	0	0	2.69392	3.09429	8.07234	0
ENSMUSG00000021540	Smad5	5.29547	6.68606	1	0	0	39.8737	16.1395	15.0793	4
ENSMUSG00000021541	Trpc7	6.93641	4.28373	0	0	0	32.1826	18.5779	22.2941	0
ENSMUSG00000021546	Hnrpk	3.60763	12.7002	2	1	0	82.1447	178.17	18.75	8
ENSMUSG00000021548	Ccnh	4.59973	9.69194	0	0	0	100.651	91.4698	16.6394	0
ENSMUSG00000021549	Rasa1	6.20858	9.28555	1	0	0	183.925	123.275	25.9751	0
ENSMUSG00000021552	Gkap1	4.94753	7.28373	0	0	0	44.3331	20.1616	14.489	7
ENSMUSG00000021555	Mak10	5.63006	9.25335	2	0	0	147.567	103.464	21.101	23
ENSMUSG00000021559	Dapk1	7.33048	8.58074	1	0	0	201.174	95.5296	39.4518	9
ENSMUSG00000021569	Trip13	4.65952	9.66162	1	0	0	103.821	92.2924	16.8068	2
ENSMUSG00000021576	Pdcd6	3.81967	10.6446	0	0	0	71.0656	99.927	15.9384	1
ENSMUSG00000021577	Sdha	4.7879	10.2589	1	0	0	133.512	132.161	18.2618	1
ENSMUSG00000021583	Arts1	5.72558	3.27282	0	0	0	14.4661	12.113	12.6563	0
ENSMUSG00000021587	Pcsk1	5.40289	2.14915	0	0	0	7.38894	6.97718	10.3128	0
ENSMUSG00000021589	Rhobtb3	6.2148	6.44616	0	0	0	51.1682	19.0383	20.1227	0
ENSMUSG00000021591	Glrx1	4.72661	8.25962	0	0	0	62.7904	38.057	15.0199	0
ENSMUSG00000021595	Nsun2	4.56041	11.4792	0	1	0	147.721	197.752	19.4103	2
ENSMUSG00000021597	Ankrd32	5.59003	6.04109	0	0	0	35.0354	14.4048	15.5626	0
ENSMUSG00000021598	D13Wsu50e	2.63552	9.84827	0	0	0	26.027	33.9463	13.6707	3
ENSMUSG00000021604	Irx4	3.1306	2.39617	0	0	0	1.79598	2.69189	7.08306	0
ENSMUSG00000021606	Ndufs6	3.10064	11.0142	0	0	1	45.4322	77.3605	15.4568	13
ENSMUSG00000021608	BC005662	5.62091	9.09342	0	0	0	138.717	93.4577	20.7352	0
ENSMUSG00000021613	Hapln1	6.11145	5.37784	0	0	0	34.1658	15.6051	17.5644	0
ENSMUSG00000021619	Atg10	8.17438	3.59642	0	0	0	36.4622	19.9999	38.3065	19
ENSMUSG00000021620	Acot12	5.47803	4.95155	0	0	0	23.7376	13.0477	13.608	0
ENSMUSG00000021621	Zcchc9	3.48285	8.6049	0	0	0	28.5337	26.5363	12.7744	2
ENSMUSG00000021622	Ckmt2	4.55127	3.02862	0	0	0	7.12556	7.32563	8.99856	0
ENSMUSG00000021629	Slc30a5	4.94054	8.77332	0	0	0	89.4646	59.9875	16.5571	5
ENSMUSG00000021635	Rad17	5.07968	9.85863	0	0	0	140.856	121.165	18.9388	6
ENSMUSG00000021636	Marveld2	2.34483	5.7065	0	0	0	3.98444	2.69215	9.36979	0
ENSMUSG00000021638	Ocln	5.79364	5.54368	0	0	0	32.106	14.4337	15.9152	2
ENSMUSG00000021643	Serf1	2.58376	5.73182	0	0	0	4.534	3.16174	9.40169	2
ENSMUSG00000021647	Cart	0.914565	1.70802	0	0	0	0.478922	0.411104	6.9922	0
ENSMUSG00000021661	Ankra2	3.42304	7.28206	0	0	0	14.4598	9.64985	11.2698	0
ENSMUSG00000021662	Rgnef	8.25974	7.41891	0	0	1	151.481	44.1373	56.6931	2
ENSMUSG00000021666	Gfm2	5.29833	7.43847	0	0	0	57.0056	25.4961	16.1582	10
ENSMUSG00000021669	Col4a3bp	6.57589	9.74699	1	0	0	242.368	173.848	31.3533	0
ENSMUSG00000021670	Hmgcr	4.4522	8.22491	0	0	0	51.1263	32.9191	14.1393	1
ENSMUSG00000021678	F2rl1	3.75478	8.81004	0	0	0	38.3026	35.5075	13.3886	4
ENSMUSG00000021684	Pde8b	7.81891	3.30022	0	0	0	29.0575	18.0481	31.0369	0
ENSMUSG00000021685	Otp	3.00988	3.70893	0	0	0	3.02085	3.86527	7.92781	0
ENSMUSG00000021686	Ap3b1	7.69575	9.19329	7	0	0	286.606	149.766	49.8064	6
ENSMUSG00000021687	Scamp1	6.38974	4.0074	0	0	0	24.4659	16.4654	17.2675	2
ENSMUSG00000021693	Kif2a	5.92305	8.95714	1	0	1	147.293	93.3558	22.6948	5
ENSMUSG00000021694	Ercc8	5.1946	2.86203	3	0	0	9.6026	8.8942	10.3564	0
ENSMUSG00000021696	Elovl7	6.15013	4.11108	0	0	0	23.3585	15.6933	15.8855	2
ENSMUSG00000021697	Depdc1b	6.51036	8.0282	3	0	0	119.686	55.0569	26.1114	1
ENSMUSG00000021700	Rab3c	7.77065	2.9119	0	0	1	24.0252	15.8166	29.2419	0
ENSMUSG00000021701	Plk2	2.53232	9.53648	1	0	0	22.3714	26.7641	13.2706	0
ENSMUSG00000021702	Thbs4	5.43192	4.06063	0	0	0	17.5535	12.7588	12.3746	0
ENSMUSG00000021707	Dhfr	4.97398	9.75092	0	0	1	129.006	109.974	18.2462	2
ENSMUSG00000021708	Rasgrf2	8.12666	2.57985	0	0	1	22.6962	14.2908	34.0661	0
ENSMUSG00000021710	Nln	5.64016	6.96099	0	0	0	52.1116	20.8413	17.1944	4
ENSMUSG00000021712	Trim23	4.62346	6.66321	0	0	0	27.1853	12.3339	12.7043	2
ENSMUSG00000021713	Ppwd1	4.56675	8.62892	0	0	0	66.6052	46.5585	15.006	0
ENSMUSG00000021715	Sdccag10	7.53709	7.41748	1	0	0	122.537	41.2163	39.2047	2
ENSMUSG00000021719	D13Bwg1146	6.71658	3.13819	0	0	0	19.2143	14.7119	18.2601	0
ENSMUSG00000021720	Rnf180	7.15491	3.33578	0	0	0	24.1224	16.7967	22.5813	0
ENSMUSG00000021730	Hcn1	8.54977	2.64247	0	0	0	26.3744	15.0872	42.9684	0
ENSMUSG00000021737	Psmd6	3.13044	11.4506	0	0	0	50.0488	92.6346	16.1088	0
ENSMUSG00000021738	Sca7	6.52226	3.66615	0	0	0	22.527	16.1929	17.6617	0
ENSMUSG00000021743	Zfp312	1.9042	2.64783	0	0	0	1.07568	1.34322	7.16002	0
ENSMUSG00000021745	Ptprg	9.41561	6.26135	1	0	0	123.496	25.3455	97.291	27
ENSMUSG00000021748	Pdhb	2.80632	11.411	0	0	0	40.7468	74.7748	15.8194	0
ENSMUSG00000021752	Kctd6	3.24975	9.46371	0	0	0	33.5405	40.1854	13.5543	19
ENSMUSG00000021754	Map3k1	5.96334	6.54604	1	0	1	48.8029	18.5693	18.4988	1
ENSMUSG00000021758	Ddx4	5.75304	8.28042	1	0	0	103.579	55.3244	20.1223	0
ENSMUSG00000021764	Ndufs4	6.64393	9.92431	2	0	0	261.23	193.485	32.7795	22
ENSMUSG00000021765	Fst	2.46702	7.10385	0	0	0	7.3948	4.753	10.6369	0
ENSMUSG00000021767	Myst4	7.42849	9.38161	7	0	0	282.562	162.586	44.4553	30
ENSMUSG00000021768	Dusp13	3.24565	2.14439	0	0	0	1.70366	2.55775	6.97413	0
ENSMUSG00000021770	Samd8	5.41812	2.55136	1	0	0	9.12723	8.45237	10.7455	3
ENSMUSG00000021771	Vdac2	3.83986	12.0787	1	0	0	92.1487	169.665	18.1996	8
ENSMUSG00000021773	Comtd1	1.60881	8.40603	0	0	0	9.66465	6.76414	12.229	2
ENSMUSG00000021774	Ube2e1	5.62609	10.747	0	0	0	224.312	220.991	24.1328	2
ENSMUSG00000021775	Nr1d2	5.01984	2.35438	0	0	0	6.84796	6.72535	9.43575	0
ENSMUSG00000021779	Thrb	6.28418	2.91175	0	0	0	14.9743	12.429	14.9971	0
ENSMUSG00000021785	Ngly1	5.96963	5.70468	0	0	0	36.007	15.3191	17.1777	0
ENSMUSG00000021794	Glud1	5.10526	11.4349	2	0	0	203.211	242.216	22.0013	5
ENSMUSG00000021796	Bmpr1a	6.51549	9.20201	1	0	0	198.183	125.443	29.1074	16
ENSMUSG00000021798	Ldb3	5.95408	5.95501	0	0	0	38.919	15.7405	17.4747	2
ENSMUSG00000021803	Pcdh21	4.36555	3.13879	0	0	0	6.54096	6.98991	8.76823	0
ENSMUSG00000021804	Rgr	3.51942	2.14454	0	0	0	2.07118	2.99499	7.13189	0
ENSMUSG00000021811	Dnajc9	2.08508	10.3178	0	0	0	22.6258	29.6169	14.2882	3
ENSMUSG00000021814	Anxa7	4.62433	10.0997	0	0	1	115.192	114.273	17.3567	11
ENSMUSG00000021815	Zmynd17	3.78795	2.21896	0	0	0	2.64953	3.59662	7.39079	0
ENSMUSG00000021816	Ppp3cb	5.53931	8.88204	1	0	0	123.817	79.5042	19.8165	4
ENSMUSG00000021820	Camk2g	5.88704	7.61771	0	0	0	78.7042	34.7705	19.8434	0
ENSMUSG00000021823	Vcl	6.74697	11.6253	5	0	0	389.022	403.238	39.9607	0
ENSMUSG00000021824	Ap3m1	4.20516	8.10597	1	0	0	40.0202	26.7998	13.3833	8
ENSMUSG00000021835	Bmp4	2.77167	8.15551	0	0	0	14.6177	12.4158	11.7608	7
ENSMUSG00000021838	Samd4	7.77167	7.4645	0	0	0	134.535	43.7323	44.2233	0
ENSMUSG00000021846	Peli2	7.10661	5.61037	0	0	0	51.0947	19.2211	27.1501	0
ENSMUSG00000021852	Slc35f4	7.83853	2.66841	0	0	0	21.8061	14.4685	29.6001	0
ENSMUSG00000021866	Anxa11	5.49365	7.48218	0	1	0	63.342	28.0516	17.2043	21
ENSMUSG00000021868	Ppif	2.65787	8.56968	0	0	0	16.5854	15.6832	12.1781	0
ENSMUSG00000021870	Slmap	6.92787	9.85892	1	0	0	281.125	196.916	36.8358	17
ENSMUSG00000021877	Arf4	4.25263	11.0638	0	0	0	109.288	147.456	17.6437	3
ENSMUSG00000021890	Eaf1	3.87931	8.99211	0	0	0	45.445	42.7612	13.8234	1
ENSMUSG00000021893	Capn7	5.11049	7.56241	0	0	0	55.459	26.0918	15.5038	3
ENSMUSG00000021898	Asb14	4.36856	3.04658	0	0	0	6.2867	6.78911	8.69996	0
ENSMUSG00000021900	Btd	2.61518	4.10559	0	0	0	2.7771	3.14891	8.11552	13
ENSMUSG00000021901	Bap1	3.07998	8.18757	0	0	0	17.8851	15.4096	11.946	2
ENSMUSG00000021902	Phf7	3.76765	7.71727	0	0	0	23.3353	15.963	12.1431	4
ENSMUSG00000021904	Sema3g	6.65315	2.49996	0	0	0	13.8771	11.3586	16.7758	0
ENSMUSG00000021905	Zcsl2	2.33085	5.20049	0	0	2	3.38293	2.61424	8.94986	5
ENSMUSG00000021909	Tnnc1	1.76553	5.21359	0	0	0	2.66598	1.76414	9.08551	0
ENSMUSG00000021916	Glt8d1	3.40599	6.51954	0	0	0	10.0678	6.2801	10.5012	1
ENSMUSG00000021917	Spcs1	0.777367	10.4109	0	0	0	14.9996	11.8064	15.5943	3
ENSMUSG00000021919	Chat	5.75556	2.95722	0	0	0	12.6824	11.025	12.4237	0
ENSMUSG00000021929	Kpna3	6.22331	9.80434	3	0	0	218.812	165.965	27.3811	10
ENSMUSG00000021936	Mapk8	6.03245	7.61432	1	0	0	82.748	36.0434	20.8983	4
ENSMUSG00000021938	Pspc1	5.80392	10.2734	4	0	0	214.668	188.422	24.5328	3
ENSMUSG00000021943	Gdf10	3.69142	3.56743	0	0	0	4.61767	5.58354	8.25975	0
ENSMUSG00000021944	Gata4	5.5345	5.78094	0	0	1	31.3727	13.6202	14.9331	2
ENSMUSG00000021947	Cryl1	6.94936	5.1706	0	0	0	42.4629	18.5136	24.302	2
ENSMUSG00000021950	Anxa8	3.86691	3.17801	0	0	0	4.49353	5.53487	8.14283	0
ENSMUSG00000021952	Xpo4	6.39063	8.26618	2	0	0	128.813	64.3055	25.423	46
ENSMUSG00000021957	Tkt	4.67661	11.457	0	0	0	159.303	206.257	19.8545	5
ENSMUSG00000021959	Lats2	5.82212	6.99419	0	0	1	56.6579	22.4022	18.3328	1
ENSMUSG00000021962	Dcp1a	5.5684	8.3305	0	0	1	98.7879	54.3637	19.024	3
ENSMUSG00000021963	Sap18	2.74996	10.1248	0	0	0	29.9692	42.0539	14.0537	10
ENSMUSG00000021967	Mrp63	1.32596	10.2775	0	0	0	16.899	16.827	14.7401	0
ENSMUSG00000021969	Zdhhc20	5.76895	7.97026	1	0	0	89.7849	43.9015	19.6695	26
ENSMUSG00000021973	Efha1	6.37478	7.24319	0	0	0	77.5241	30.0935	23.0235	2
ENSMUSG00000021974	Fgf9	5.29583	5.47529	0	0	0	25.719	12.3198	13.5116	0
ENSMUSG00000021975	D14Ertd231	6.46571	8.66657	0	0	0	158.017	87.4328	27.1707	21
ENSMUSG00000021978	Extl3	4.82848	7.81303	0	0	0	53.8446	28.2395	14.7667	4
ENSMUSG00000021981	Cab39l	6.75386	4.54312	1	0	0	32.9601	18.0364	21.0765	4
ENSMUSG00000021982	Cdadc1	5.26892	2.4703	0	0	0	8.20804	7.7567	10.2071	1
ENSMUSG00000021983	Atp8a2	9.10481	3.43223	0	0	0	44.0587	20.1725	62.935	0
ENSMUSG00000021987	Mtmr6	5.2001	7.47447	0	0	0	55.4563	25.2823	15.7637	0
ENSMUSG00000021990	Spata13	5.84995	6.76294	0	0	0	51.4646	19.8818	18.1259	1
ENSMUSG00000021991	Cacna2d3	9.67276	2.81474	0	0	0	38.731	16.6748	82.7059	0
ENSMUSG00000021993	Mipep	6.91765	7.30836	0	0	0	95.7544	34.9554	29.0927	13
ENSMUSG00000021994	Wnt5a	4.30254	7.27841	0	0	0	28.6755	15.2416	12.6227	0
ENSMUSG00000021996	Esd	4.1819	10.5838	0	0	0	93.5709	116.939	16.6941	3
ENSMUSG00000021998	Lcp1	6.56061	5.8724	0	0	0	46.6342	17.9107	21.9198	0
ENSMUSG00000021999	Cpb2	5.32812	2.50709	0	0	0	8.58666	8.04565	10.4188	2
ENSMUSG00000022003	Slc25a30	4.69655	7.77502	0	0	0	48.6647	25.9943	14.2776	2
ENSMUSG00000022020	Narg1l	5.81152	7.55555	0	0	0	74.2415	32.5319	19.2206	11
ENSMUSG00000022024	Sugt1	5.39455	11.0823	7	0	0	218.409	235.119	23.1394	22
ENSMUSG00000022025	Lect1	4.61341	2.15709	0	0	0	4.84083	5.19642	8.42233	0
ENSMUSG00000022031	Elp3	5.96862	8.96319	0	0	0	150.059	94.8667	23.0797	2
ENSMUSG00000022041	Chrna2	3.58388	2.03237	0	0	0	2.05072	2.93649	7.10423	0
ENSMUSG00000022043	Trim35	3.84629	9.45245	0	0	0	52.225	55.701	14.352	0
ENSMUSG00000022044	Stmn4	4.1132	2.86272	0	0	0	4.73088	5.6234	8.19465	0
ENSMUSG00000022048	Dpysl2	6.04444	9.5891	0	0	0	192.326	141.223	25.1099	0
ENSMUSG00000022052	Ppp2r2a	5.85833	10.5796	2	1	0	235.731	219.936	25.7031	5
ENSMUSG00000022053	Ebf2	7.64009	4.17514	0	0	1	38.5895	20.4005	30.7269	0
ENSMUSG00000022054	Nef3	2.47508	5.84974	0	0	0	4.45486	2.98326	9.49306	0
ENSMUSG00000022055	Nefl	1.94935	10.6594	0	0	0	23.1571	31.3988	14.7917	0
ENSMUSG00000022060	Klf12	8.12497	3.38106	6	0	1	32.8831	18.9525	36.6028	21
ENSMUSG00000022075	Rhobtb2	4.35607	5.39568	0	0	0	14.2472	8.42219	10.7426	1
ENSMUSG00000022076	Klhl1	8.69519	5.69981	0	0	0	83.7475	22.507	61.4249	0
ENSMUSG00000022089	Bin3	5.25259	7.84348	0	0	0	68.2949	33.8618	16.5439	2
ENSMUSG00000022091	Sorbs3	4.97829	5.08613	0	0	0	19.5312	10.9345	11.962	0
ENSMUSG00000022092	Ppp3cc	6.15951	3.09073	0	0	0	15.5813	12.8505	14.5319	2
ENSMUSG00000022094	Slc39a14	5.58373	7.50583	0	0	0	66.4477	29.3472	17.739	18
ENSMUSG00000022096	Hr	4.28503	3.36531	0	0	0	6.79432	7.19458	8.82275	0
ENSMUSG00000022097	Sftpc	1.64662	2.41004	0	0	0	0.866043	1.00644	7.08349	0
ENSMUSG00000022098	Bmp1	5.51201	6.50539	0	0	0	40.5084	16.0361	15.8354	0
ENSMUSG00000022099	Epb4.9	4.73265	7.97012	0	0	0	54.845	30.6093	14.6503	45
ENSMUSG00000022100	Xpo7	6.69127	9.00013	3	0	0	194.855	114.402	30.7509	2
ENSMUSG00000022101	Fgf17	2.35219	4.96385	0	0	1	3.18348	2.65773	8.75888	2
ENSMUSG00000022105	Rb1	7.02503	7.1177	0	0	0	90.3098	31.3859	29.9983	1
ENSMUSG00000022106	Rcbtb2	5.35847	5.08093	0	0	0	23.4587	12.5263	13.2785	2
ENSMUSG00000022108	Itm2b	4.52663	8.94157	0	0	0	73.5797	56.5381	15.3123	2
ENSMUSG00000022109	Med4	3.13947	8.58783	0	0	0	22.306	21.4572	12.43	0
ENSMUSG00000022110	Sucla2	5.43886	10.7364	0	0	0	207.57	207.487	22.7275	2
ENSMUSG00000022112	Gpc5	10.4872	3.24061	0	0	0	58.0362	19.235	139.841	0
ENSMUSG00000022114	Spry2	2.10601	10.3283	0	1	0	22.8933	30.1971	14.2953	4
ENSMUSG00000022122	Ednrb	4.88523	6.75473	0	0	0	33.3519	14.3534	13.5987	0
ENSMUSG00000022124	Fbxl3	4.20828	8.0559	0	0	0	39.1589	25.8339	13.3295	5
ENSMUSG00000022129	Dct	5.29935	1.9929	0	0	0	6.50719	6.23469	9.86065	0
ENSMUSG00000022136	Dnajc3	5.43653	6.39733	0	0	1	37.5941	15.0566	15.3191	3
ENSMUSG00000022139	Mbnl2	7.2888	8.38016	9	0	0	181.619	82.1196	37.9858	8
ENSMUSG00000022141	Nipbl	7.45129	8.15108	2	2	0	171.471	70.6218	40.1966	21
ENSMUSG00000022142	Nup155	5.70249	9.93546	5	0	0	188.71	154.885	22.9901	4
ENSMUSG00000022144	Gdnf	4.73145	2.3484	0	0	0	5.77445	5.98461	8.79368	0
ENSMUSG00000022150	Dab2	7.13816	3.62903	0	0	0	27.0992	17.9433	23.0123	0
ENSMUSG00000022159	Rab2b	4.13521	6.21752	0	0	0	15.785	8.40449	11.1491	4
ENSMUSG00000022175	Lrp10	2.62012	8.18412	0	0	0	13.6247	11.5106	11.7514	0
ENSMUSG00000022176	Rem2	2.11603	7.55546	0	0	1	7.821	5.10489	11.1128	0
ENSMUSG00000022180	Slc7a8	5.89903	3.63051	0	0	0	17.9001	13.8667	13.8774	0
ENSMUSG00000022184	Fbxo4	3.81895	2.46677	0	0	0	3.08126	4.10374	7.58766	0
ENSMUSG00000022186	Oxct1	6.99475	7.91773	0	0	0	132.811	55.3441	31.8211	0
ENSMUSG00000022191	Rnasen	6.7545	9.57618	15	0	1	Hotspot	163.796	33.2872	23
ENSMUSG00000022194	Bcl2l2	2.27381	6.20366	0	0	0	4.57181	2.78603	9.80692	0
ENSMUSG00000022198	Pabpn1	1.98768	10.0745	0	2	0	20.3696	24.6078	14.011	18
ENSMUSG00000022200	Golph3	4.91538	9.75714	0	0	0	125.115	107.875	17.9904	4
ENSMUSG00000022201	Zfr	5.58529	10.0155	6	0	1	184.509	155.761	22.2873	7
ENSMUSG00000022203	Efs	3.21304	7.50634	0	0	0	13.9564	9.99063	11.3202	1
ENSMUSG00000022205	Sub1	3.82375	5.76679	0	0	0	10.5228	6.6208	10.2429	25
ENSMUSG00000022206	Npr3	5.94026	3.08307	0	0	0	14.3725	12.1215	13.3992	0
ENSMUSG00000022214	Wdr23	3.32682	5.97341	0	0	0	7.74874	5.16772	9.93024	0
ENSMUSG00000022216	Psme1	1.49262	10.5577	0	0	0	19.0897	21.6303	14.9617	3
ENSMUSG00000022220	Adcy4	3.89995	2.92504	0	0	0	4.10875	5.16677	7.99249	0
ENSMUSG00000022229	Atp12a	4.556	3.24888	0	0	0	7.89461	7.87769	9.18911	0
ENSMUSG00000022231	Sema5a	8.81771	3.33449	0	0	0	39.1125	19.4825	53.0503	0
ENSMUSG00000022234	Cct5	3.45246	13.0912	3	0	0	75.615	180.13	19.1412	2
ENSMUSG00000022240	Ctnnd2	9.44712	6.5028	0	0	0	136.929	27.4497	101.285	0
ENSMUSG00000022241	Tars	4.17672	10.2142	2	0	0	85.1719	98.4533	16.1299	0
ENSMUSG00000022243	Slc45a2	4.83355	3.9129	0	0	0	12.3564	10.1381	10.3776	0
ENSMUSG00000022245	Lbxcor1	3.14454	3.50947	0	0	0	3.0398	4.03179	7.84254	0
ENSMUSG00000022246	Rai14	7.17146	10.0132	4	0	0	317.348	221.569	41.709	165
ENSMUSG00000022247	Bxdc2	3.47794	11.7583	2	0	0	66.7522	125.941	16.9992	4
ENSMUSG00000022248	Rad1	2.91131	8.64245	0	0	1	19.7898	19.3917	12.351	8
ENSMUSG00000022255	Mtdh	5.8728	9.65181	2	0	0	184.549	139.74	23.7473	6
ENSMUSG00000022257	Laptm4b	5.53201	9.83805	1	0	0	171.685	139.81	21.5627	0
ENSMUSG00000022261	Sdc2	6.83288	3.85473	0	0	0	26.8143	17.6923	20.4885	0
ENSMUSG00000022262	Dnahc5	8.07517	2.75287	0	0	0	24.3391	15.2951	33.6866	0
ENSMUSG00000022265	Ank	7.00394	6.82627	0	0	1	78.2584	26.3908	28.9394	0
ENSMUSG00000022272	Myo10	7.57836	9.59536	3	8	0	317.34	187.184	48.7456	88
ENSMUSG00000022280	Rnf19	5.43179	8.38096	0	0	0	95.6307	54.0514	18.314	2
ENSMUSG00000022285	Ywhaz	4.58562	11.6284	0	0	0	153.866	210.42	19.7777	20
ENSMUSG00000022286	Grhl2	7.0482	8.59058	0	0	0	184.99	92.3007	34.6489	39
ENSMUSG00000022292	Rrm2b	5.2135	5.89181	1	0	0	28.3196	12.4159	13.7061	1
ENSMUSG00000022295	Atp6v1c1	4.93074	8.54995	0	0	0	80.9411	51.1457	16.1852	2
ENSMUSG00000022297	Fzd6	5.01841	6.78504	0	0	0	36.389	15.3424	14.1005	0
ENSMUSG00000022299	Mftc	4.2043	7.73903	0	0	0	33.3966	20.2612	12.9431	1
ENSMUSG00000022300	Wdsof1	5.08436	10.8281	0	0	0	179.732	190.697	20.7063	2
ENSMUSG00000022304	Dpys	6.47551	2.51226	0	0	1	13.1608	11.0171	15.6055	10
ENSMUSG00000022305	Lrp12	6.18733	5.6775	0	0	0	38.5298	16.1437	18.5714	0
ENSMUSG00000022306	Zfpm2	8.82586	5.88285	0	0	0	92.1906	23.1066	67.1581	0
ENSMUSG00000022309	Angpt1	7.97863	2.93565	0	0	0	25.8206	16.2722	32.5786	0
ENSMUSG00000022311	Csmd3	8.71299	2.9621	0	0	0	32.155	17.2324	48.3866	0
ENSMUSG00000022312	Eif3s3	6.30239	11.9133	0	0	0	349.262	403.944	34.1863	13
ENSMUSG00000022314	Rad21	4.85972	11.8605	0	0	0	189.557	254.369	21.4803	13
ENSMUSG00000022315	Slc30a8	5.32844	2.78942	0	0	0	9.86375	9.05717	10.6902	0
ENSMUSG00000022321	Cdh10	7.60947	4.65469	0	0	0	44.5819	20.4461	31.6123	0
ENSMUSG00000022324	Matn2	6.5043	2.90289	0	0	0	16.068	13.0005	16.3592	2
ENSMUSG00000022329	Stk3	8.13022	7.23635	0	0	0	133.438	38.5698	52.0776	0
ENSMUSG00000022335	Zfp406	7.45189	3.90512	1	0	0	33.1707	19.5382	27.3512	2
ENSMUSG00000022338	Eny2	3.25927	7.19977	0	0	0	12.3799	8.30696	11.0444	4
ENSMUSG00000022339	Ebag9	4.44042	7.9588	1	0	0	44.5807	26.7355	13.7708	2
ENSMUSG00000022342	Kcnv1	3.11253	3.52964	0	0	0	3.00184	3.97273	7.84219	0
ENSMUSG00000022351	Sqle	4.00917	9.92244	0	0	0	68.8355	78.3468	15.3113	0
ENSMUSG00000022353	Mtss1	7.13509	10.2616	5	0	0	335.252	248.869	41.9514	45
ENSMUSG00000022354	Ndufb9	2.50589	11.1546	0	0	0	33.0755	56.0491	15.3661	7
ENSMUSG00000022358	Fbxo32	5.12073	3.02161	0	0	0	9.98126	9.17932	10.2963	0
ENSMUSG00000022360	Atad2	5.35882	9.27516	1	0	1	133.083	96.1897	19.4309	2
ENSMUSG00000022361	Zhx1	4.86839	5.03483	0	0	0	18.0801	10.4832	11.5862	1
ENSMUSG00000022364	Wdr67	5.85322	6.89544	0	0	0	54.7228	21.3502	18.366	1
ENSMUSG00000022365	Derl1	4.51816	7.21295	2	0	0	32.6012	16.0994	13.067	0
ENSMUSG00000022367	Has2	4.8518	4.98329	0	0	0	17.6307	10.4219	11.4861	0
ENSMUSG00000022370	Mrpl13	4.53754	10.0702	0	0	0	107.595	108.448	17.0011	3
ENSMUSG00000022371	Col14a1	7.74551	2.47873	0	0	0	19.3115	13.207	27.7621	0
ENSMUSG00000022372	Sla	5.67274	4.5178	0	0	0	22.458	13.9377	13.9233	0
ENSMUSG00000022376	Adcy8	7.85328	2.72661	0	0	0	22.5307	14.8397	29.9804	0
ENSMUSG00000022377	Ddef1	8.20138	6.64757	2	0	1	103.618	27.741	51.2514	11
ENSMUSG00000022382	Wnt7b	5.53556	6.20589	0	0	0	36.388	14.6911	15.5254	0
ENSMUSG00000022383	Ppara	6.07159	2.17549	0	0	0	9.648	8.57776	12.942	0
ENSMUSG00000022386	Trmu	4.17616	5.72863	0	0	0	13.765	7.88553	10.7352	1
ENSMUSG00000022389	Tef	4.58779	6.83809	0	0	1	28.676	13.2523	12.8109	0
ENSMUSG00000022390	Zc3h7b	5.25335	2.48895	1	0	0	8.22618	7.7796	10.179	5
ENSMUSG00000022394	L3mbtl2	4.60585	9.54219	3	1	1	96.3833	84.3801	16.436	8
ENSMUSG00000022403	St13	5.11499	11.0546	4	0	0	190.942	211.133	21.3107	19
ENSMUSG00000022404	Slc25a17	5.38729	7.88258	42	0	0	Hotspot	36.5113	17.2703	9
ENSMUSG00000022407	Adsl	4.48729	9.66973	6	0	0	92.3286	86.0098	16.2307	9
ENSMUSG00000022412	AI452372	4.22389	7.64562	0	0	0	32.3707	19.0737	12.8757	5
ENSMUSG00000022414	Map3k7ip1	4.83572	3.66365	3	0	0	11.2585	9.78573	10.1507	7
ENSMUSG00000022415	Syngr1	4.81752	8.07561	0	0	1	60.8473	34.3478	15.0837	37
ENSMUSG00000022419	Depdc6	7.13412	7.9035	1	0	0	137.823	55.9579	33.8546	11
ENSMUSG00000022420	Dnalc4	3.69755	6.17423	0	0	0	10.9654	6.6312	10.4713	3
ENSMUSG00000022421	Cbx6	5.58075	4.428	0	0	0	21.0667	13.5531	13.4034	0
ENSMUSG00000022425	Enpp2	6.34167	6.62297	0	0	0	57.5198	21.0402	21.4804	0
ENSMUSG00000022427	Tomm22	1.33285	10.0701	0	0	0	16.035	15.2942	14.4585	4
ENSMUSG00000022428	Pgea1	3.07622	6.69687	0	0	1	8.68107	5.58292	10.4324	4
ENSMUSG00000022429	Dmc1h	5.44427	5.71558	0	0	0	29.5969	13.1473	14.4342	5
ENSMUSG00000022432	Smc1l2	6.07191	3.18638	0	0	0	15.7762	12.9663	14.1871	3
ENSMUSG00000022433	Csnk1e	4.38281	8.32161	0	0	0	50.8071	34.3002	14.0783	30
ENSMUSG00000022435	Upk3a	2.41359	2.17418	0	0	0	1.06372	1.53633	6.79932	0
ENSMUSG00000022436	Sh3bp1	3.40477	6.35448	0	0	0	9.41482	5.92015	10.344	0
ENSMUSG00000022438	Parvb	6.33926	2.67199	2	0	0	13.6003	11.4532	14.994	1
ENSMUSG00000022442	Ttll1	4.76054	5.4768	0	0	0	19.3721	10.0781	11.758	2
ENSMUSG00000022443	Myh9	6.34914	9.35916	8	20	0	198.036	Hotspot	27.6159	46
ENSMUSG00000022450	Ndufa6	2.04579	9.86013	0	0	0	19.6475	22.9695	13.7196	16
ENSMUSG00000022451	Ptk9	3.5684	9.5984	1	0	0	44.0824	52.0765	14.0939	2
ENSMUSG00000022453	Naga	3.2121	4.60472	0	0	0	4.67812	4.6123	8.69903	1
ENSMUSG00000022454	Nell2	8.82229	6.64025	0	0	0	122.78	28.6177	71.793	0
ENSMUSG00000022456	3-Sep	4.09246	7.15378	0	0	0	22.8885	12.6846	12.0576	0
ENSMUSG00000022462	Slc38a2	3.62047	11.9165	3	0	0	75.965	143.44	17.4861	7
ENSMUSG00000022463	Srebf2	5.83948	8.68073	3	0	0	127.784	75.7771	21.4933	0
ENSMUSG00000022464	Slc38a4	5.93588	10.5669	0	3	0	241.691	223.364	26.3845	50
ENSMUSG00000022468	Pp11r	3.34085	2.10321	0	0	0	1.78089	2.65003	6.99681	0
ENSMUSG00000022469	Rapgef3	4.46499	2.34556	0	0	0	4.8024	5.32697	8.31362	0
ENSMUSG00000022471	Xrcc6	4.61859	8.69942	1	0	0	71.1218	50.0109	15.2669	9
ENSMUSG00000022472	D15Wsu75e	4.5631	8.05001	0	0	0	50.9083	30.2721	14.2274	1
ENSMUSG00000022475	Hdac7a	5.7102	6.08272	0	0	0	37.2342	15.0563	16.2485	0
ENSMUSG00000022476	Polr3h	5.2474	8.13683	0	0	0	78.6238	42.2783	16.9651	2
ENSMUSG00000022477	Aco2	5.41376	10.5016	0	0	0	194.832	185.862	22.0792	5
ENSMUSG00000022479	Vdr	5.7505	2.96863	0	0	0	12.7261	11.0542	12.4154	0
ENSMUSG00000022484	Hoxc10	2.29983	4.6797	0	0	0	2.84896	2.57786	8.5384	0
ENSMUSG00000022485	Hoxc5	1.77484	3.31029	0	0	0	1.39041	1.54881	7.64128	0
ENSMUSG00000022486	Hoxc4	0.344828	5.92625	0	0	0	2.23853	0.63029	10.8441	0
ENSMUSG00000022488	Nckap1l	5.49211	2.51943	0	0	0	9.26391	8.53599	10.9607	0
ENSMUSG00000022489	Pde1b	4.74174	6.88184	0	0	0	32.3986	14.4844	13.2999	1
ENSMUSG00000022498	Txndc11	5.89949	2.38256	0	0	0	10.0939	9.0465	12.3935	2
ENSMUSG00000022503	Nubp1	3.64051	9.15061	0	0	0	39.9561	41.6097	13.6333	1
ENSMUSG00000022508	Bcl6	4.56694	6.75917	0	0	0	27.2752	12.6059	12.6647	0
ENSMUSG00000022510	Trp63	7.699	4.35121	0	0	0	41.6229	20.6474	32.1481	0
ENSMUSG00000022512	Cldn1	3.92495	2.35149	0	0	1	3.16333	4.11469	7.61255	0
ENSMUSG00000022514	Il1rap	7.08455	3.75932	0	0	0	28.0353	18.2041	22.7221	0
ENSMUSG00000022517	Mgrn1	5.66775	8.60121	2	0	0	115.89	68.2222	20.1354	14
ENSMUSG00000022521	Crebbp	7.01212	9.16933	2	0	0	230.274	134.696	35.9277	1
ENSMUSG00000022523	Fgf12	8.15692	2.86674	0	0	0	26.3128	16.0929	35.5243	0
ENSMUSG00000022525	Hrasls	4.38101	3.80865	0	0	0	8.73798	8.23623	9.34428	0
ENSMUSG00000022528	Hes1	0.973795	6.33357	0	0	0	3.00454	1.1269	10.5854	0
ENSMUSG00000022529	Zfp263	2.73963	7.33824	0	0	0	9.5903	6.62534	10.9107	0
ENSMUSG00000022538	D16Bwg1547	4.71265	9.08462	1	0	0	88.1897	67.1308	16.1369	6
ENSMUSG00000022545	Ercc4	5.09942	4.14811	0	0	0	15.5253	11.4373	11.3393	3
ENSMUSG00000022550	Adck5	4.28939	6.64092	0	0	0	21.0987	10.5036	11.8858	5
ENSMUSG00000022551	Cyc1	1.25641	12.026	1	0	0	22.8812	31.1767	17.358	0
ENSMUSG00000022553	Maf1	1.61824	8.84316	0	0	0	11.6937	9.26021	12.7177	0
ENSMUSG00000022554	Brp16	1.4782	5.40626	0	0	0	2.55138	1.436	9.38265	0
ENSMUSG00000022557	Bop1	4.60461	9.79491	4	1	0	104.206	96.899	16.8129	5
ENSMUSG00000022560	Gpr172b	1.41034	6.24172	0	0	0	3.30067	1.5238	10.1638	2
ENSMUSG00000022561	Gpaa1	1.8504	5.65843	0	0	0	3.16097	1.9042	9.42763	2
ENSMUSG00000022562	Oplah	3.4121	2.42429	0	0	0	2.20964	3.21724	7.24539	0
ENSMUSG00000022564	Grina	1.63877	7.66622	0	0	0	6.83362	3.95066	11.4175	0
ENSMUSG00000022565	Plec1	5.94474	8.48354	1	0	0	121.845	67.7949	21.9085	0
ENSMUSG00000022570	Tsta3	2.34199	8.59147	0	0	0	14.235	12.9307	12.1741	1
ENSMUSG00000022571	Pycrl	2.34625	7.68657	0	0	0	9.28443	6.58039	11.2141	1
ENSMUSG00000022574	Naprt1	1.81476	6.01764	0	0	0	3.51431	1.94388	9.75342	0
[truncated: 5,436 more rows]
